# Supplementary material for: Genome-Wide Association Study and Genomic Prediction Elucidate the Distinct Genetic Architecture of Aluminum and Proton Tolerance in Arabidopsis thaliana
Source: Front Plant Sci. 2020 Apr 9;11:405. doi: 10.3389/fpls.2020.00405 (PMC7160251; doi:10.3389/fpls.2020.00405)
Supplement: Supplementary file 2 [file Table_1.xlsx]

## Sheet: Supplementary Table S1
Supplementary Table S1 List of A.thaliana accessions used in this study
EcoID	Name	Al tolerancea (RRLAl [%])	proton tolerancea (RRLproton [%])	Difference rateb (RRLAl)	Difference rateb (RRLproton)	Subpopulationc	latitude	longitude
CS76352	Voeran-1	6.6	28.9	-1.35468	-0.256424	Admix	46.36	11.23
6901	Bil-7	11.4	47	-0.775726	0.102685	NE	63.324	18.484
CS76392	Bak-2	11.8	34.1	-0.79739	-0.146127	Admix	41.79	43.48
7029	Bch-3	12.8	38.2	-0.497784	0.166848	WE	49.5166	9.3166
6979	Wei-0	13.3	40.3	-0.310594	-0.129716	Admix	47.25	8.26
8314	Ka-0	13.4	50	-0.204334	0.134015	Admix	47	14
6932	Ler-1	13.5	30.4	0.228426	-0.220334	Admix	47.984	10.8719
CS76398	Nemrut-1	13.5	49.6	-0.972588	0.177647	Admix	38.64	42.24
8395	Tu-0	13.6	NA	-0.175722	NA	Admix	45	7.5
6971	Ts-5	13.7	30.5	-0.47619	-0.278716	SE	41.7194	2.93056
CS76416	Pra-6	14.2	NA	0.0738923	NA	Admix	41.05	-3.54
CS76384	Kly4	14.3	46.6	-0.114716	0.0758777	CA	51.32	82.55
7523	Pna-17	14.6	25.6	-0.840813	-0.434733	Admix	42.0945	-86.3253
6906	C24	14.6	30.5	-0.31975	-0.255098	SE	40.2077	-8.42639
CS76382	Sha	14.7	41.2	0.226547	0.0724859	CA	37.29	71.3
7514	Rrs-7	14.8	44	-0.350936	0.114507	Admix	41.5609	-86.4251
CS76347	Aitba-2	15.8	37.4	-0.354343	0.00233903	Admix	31.48	-7.45
6996	An-2	15.8	36.3	-0.137854	0.146267	WE	51.2167	4.4
7105	Dra-2	16.1	25.4	-0.518783	-0.540441	EE	49.4167	16.2667
7030	Bch-4	16.6	48.3	-0.677266	0.113405	Admix	49.5166	9.3166
CS76373	Bolin-1	16.8	39	-0.616482	-0.0501216	Admix	44.46	25.74
7192	Kil-0	16.9	41.7	-0.0309767	-0.00418314	WE	55.6395	-5.66364
CS76367	Lago-1	17.2	38.6	-0.420057	-0.0489378	SE	39.18	16.26
7151	Go-0	17.3	35.1	-0.22205	-0.00776253	WE	51.5338	9.9355
7520	Lp2-2	17.8	36	-0.546726	-0.0936253	EE	49.38	16.81
CS76401	Tuescha9	17.8	46	0.298281	0.117775	Admix	48.53	9.05
6962	Shahdara	17.9	31.8	0.409759	-0.305697	CA	38.35	68.48
6929	Condara	18	43.1	0.0339416	-0.00942521	CA	38.48	68.49
7139	Fi-1	18.6	44.2	-0.132676	0.11757	WE	50.5	8.0167
6970	Ts-1	18.6	51.4	-0.355014	0.244823	SE	41.7194	2.93056
8300	Gr-1	18.7	31	-0.200314	-0.307621	EE	47	15.5
7300	Pla-0	18.8	NA	0.00315172	NA	Admix	41.5	2.25
CS76418	Vie-0	19	32.6	-0.335542	-0.172411	Admix	42.63	0.76
7168	Hodja-Obi-Garm	19.1	45.5	0.137222	0.0678995	CA	38.7146	69.7061
6982	Wt-5	19.2	44.4	-0.286457	0.0376499	WE	52.3	9.3
5837	Bor-1	19.3	29.9	-0.224346	-0.313818	EE	49.4013	16.2326
CS76420	Copac-1	19.4	34.8	-0.262266	-0.141573	Admix	46.11	21.95
7100	Db-0	19.4	48.3	0.0278216	0.0575631	WE	50.3055	8.324
6928	KNO-18	19.6	43.5	0.216686	-0.0497468	Admix	41.2816	-86.621
CS76425	Valsi-1	19.7	34.1	-0.104125	-0.0874613	SE	40.18	16.45
7521	Lp2-6	19.9	31.3	-0.379776	-0.294283	EE	49.38	16.81
CS76368	Apost-1	19.9	31.9	0.215686	-0.127758	SE	39.01	16.47
8351	Ost-0	19.9	42.1	-0.251509	0.0544705	Admix	60.25	18.37
CS76390	Lag2.2	20	39.9	-0.4365	0.0388244	SE	41.83	46.28
8374	Rsch-4	20.1	34.2	-0.266437	-0.117021	WE	56.3	34
CS76422	Krazo-2	20.2	44	0.034584	0.0335747	CA	53.09	52
6992	Ang-0	20.6	28.5	-0.332815	-0.273585	Admix	50.3	5.3
7292	Pa-3	20.7	41.9	-0.739824	-0.0950758	WE	38.07	13.22
8353	Pa-1	20.8	37	-0.122819	0.0172054	SE	38.07	13.22
7239	Ll-2	20.8	46.3	-0.426365	0.132575	SE	41.59	2.49
7033	Buckhorn_Pass	20.9	25.4	-0.484306	-0.625603	NA	41.3599	-122.755
7117	El-0	21	36.9	-0.231028	-0.159971	WE	51.5105	9.68253
6899	Bay-0	21.1	32	-0.284255	-0.231872	Admix	49	11
6945	Nok-3	21.2	36.9	0.0260246	0.0437621	Admix	52.24	4.45
8213	Pro-0	21.4	40.9	0.107748	-0.00505916	Admix	43.25	-6
CS76372	Jablo-1	21.6	38.5	-0.583056	-0.02603	SE	41.59	25.2
CS76423	Galdo-1	21.6	48.7	-0.229632	0.0627865	SE	40.57	15.32
8297	Ge-0	21.8	41.9	-0.166986	0.025989	Admix	46.5	6.08
8274	Can-0	21.8	42.6	-0.10174	0.120139	Admix	29.2144	-13.4811
CS76408	WalhaesB4	21.9	35.8	-0.0810573	-0.155596	Admix	48.6	9.19
8329	Lm-2	21.9	44	0.733761	0.135606	WE	48	0.5
6910	Ct-1	22.2	34.1	-0.659424	-0.0605227	EE	37.3	15
6968	Tamm-2	22.2	38.5	-0.118351	0.0671695	NE	60	23.5
6043	Lov-1	22.3	34	-0.288024	-0.37487	NE	62.801	18.079
7013	Bd-0	22.4	31.9	0.0163815	-0.248647	Admix	52.4584	13.287
6976	Uod-7	22.5	36.8	-0.163951	-0.117828	EE	48.3	14.45
6907	CIBC-17	22.5	43.2	-0.0534956	0.00849201	Admix	51.4083	-0.6383
CS76353	Altenb-2	22.5	45	-0.08926	0.0999349	Admix	46.37	11.24
8311	In-0	22.7	41	-0.414483	0.0328189	Admix	47.5	11.5
CS76399	Ey15-2	22.8	40.9	-0.0674869	0.037294	Admix	48.43	8.77
CS76351	Rovero-1	22.9	43.9	-0.0824587	0.0398724	Admix	46.25	11.17
6969	Tamm-27	22.9	38.9	-0.139048	0.0473785	NE	60	23.5
6963	Sorbo	23	48.2	-0.0727839	0.239839	CA	38.35	68.48
7201	Kr-0	23.2	32	-0.178923	-0.112554	WE	51.3317	6.55934
7378	Uk-1	23.3	36.1	-0.204725	0.04369	Admix	48.0333	7.7667
8343	Na-1	23.6	39.4	-0.227879	-0.0479113	Admix	47.5	1.5
6967	Sq-8	23.6	48.9	0.0174367	0.237483	Admix	51.4083	-0.6383
CS76359	Ciste-1	23.7	45.6	0.235986	0.00113985	SE	41.62	12.87
6920	GOT-22	23.8	NA	-0.198142	NA	Admix	51.5338	9.9355
7438	N13	23.9	48.2	0.146753	0.0558315	Admix	61.36	34.15
7518	Omo-2-1	24	35.6	0.0388309	-0.142445	Admix	56.1509	15.7735
8215	Fei-0	24.2	41.3	-0.160906	-0.113206	Admix	40.5	-8.32
7373	Tsu-0	24.2	33.9	0.553914	-0.0687877	Admix	34.43	136.31
7165	Hn-0	24.6	35.6	0.346374	-0.144043	Admix	51.3472	8.28844
6919	Ga-0	24.7	44	0.130645	0.0342565	Admix	50.3	8
CS76395	Kastel-1	24.9	32.5	0.128568	-0.100551	Admix	44.64	34.38
6911	Cvi-0	24.9	34	-0.185414	-0.0405338	Admix	15.1111	-23.6167
CS76387	Xan-1	24.9	43.6	-0.0620341	-0.0403359	SE	38.65	48.8
8310	Hs-0	25	36.9	-0.136138	0.105048	WE	52.24	9.44
6921	Got-7	25	NA	-0.115304	NA	Admix	51.5338	9.9355
7032	Bsch-2	25.1	32.4	-0.373444	-0.225711	Admix	50.0167	8.6667
8270	Bs-1	25.3	42.1	-0.193532	0.062745	Admix	47.5	7.5
7195	Kl-1	25.4	34	0.147117	-0.113528	WE	50.95	6.9666
6983	Yo-0	25.6	50.8	-0.0165282	0.161062	Admix	37.45	-119.35
CS76404	HKT2.4	26.3	45.8	-0.0503009	0.0955714	Admix	48.14	9.4
7004	Bs-2	26.4	43.5	-0.293186	-0.0853709	Admix	47.5	7.5
7011	Be-1	26.4	42.6	-0.0531438	0.0528948	Admix	49.6803	8.6161
CS76403	TueSB30-3	26.5	45.3	0.0841985	0.0593775	Admix	48.53	9.06
CS76380	Sij2	26.5	47.6	-0.108497	0.107013	CA	41.45	70.05
6927	KNO-10	26.5	41.1	-0.206503	0.107115	NA	41.2816	-86.621
7147	Gie-0	26.7	40.8	0.403015	0.0121502	Admix	50.584	8.67825
CS76381	Sij4	26.9	46.6	-0.087365	0.0995355	CA	41.45	70.05
8325	Lip-0	27.1	40	0.103937	-0.0654827	EE	50	19.3
CS76383	Koz2	27.2	52.7	0.165222	0.28067	CA	51.33	82.19
6940	Mz-0	27.4	34.6	-0.0325068	-0.0206808	WE	50.3	8.3
7078	Co-2	27.5	37.1	0.0385467	-0.0536148	Admix	40.12	-8.25
6046	Lov-5	27.5	47.6	0.122021	0.126209	NE	62.801	18.079
7186	Kn-0	27.6	47.3	0.0655668	0.0507669	EE	54.8969	23.8924
CS76391	Vash-1	27.6	45.8	0.0632513	0.170623	SE	41.24	46.37
7126	Es-0	27.6	NA	0.180588	NA	Admix	60.1997	24.5682
8290	En-1	27.7	30.5	-0.379518	-0.236452	EE	50	8.5
6937	Mrk-0	28	47.7	0.120857	0.129297	Admix	49	9.3
CS76397	Del-10	28.1	44.1	0.394626	0.084936	Admix	44.94	21.18
CS76389	Istisu-1	28.2	42.8	0.164162	0.00165861	SE	38.98	48.56
7079	Co-3	28.3	45.9	-0.207872	0.129214	SE	40.12	-8.25
8271	Bu-0	28.4	29	-0.253287	-0.341474	WE	50.5	9.5
CS76426	Leb-3	28.5	52.3	0.467524	0.296689	CA	51.65	80.82
7330	Sapporo-0	28.7	28.4	0.129797	-0.39333	Admix	43.0553	141.346
6961	Se-0	29	45.7	0.166291	0.0707499	SE	38.3333	-3.53333
CS76405	TueWa1-2	29.1	40.4	0.0943532	-0.0271458	Admix	48.53	9.04
7152	Go-2	29.6	35.9	-0.00781497	-0.105831	WE	51.5338	9.9355
7515	Rrs-10	29.7	50.9	-0.0394706	0.436206	NA	41.5609	-86.4251
6930	KZ-1	29.8	43.5	0.0618385	0.0220182	CA	49.5	73.1
7526	Pna-10	30	49	-0.0255342	0.371944	NA	42.0945	-86.3253
CS76378	Stepn-1	30.3	57.7	0.0855838	0.249077	CA	54.06	60.48
CS76379	Sij1	30.5	51.4	0.117635	0.226194	CA	41.45	70.05
7296	Petergof	30.7	35.7	0.276003	-0.217032	EE	59	29
CS76421	Borsk-2	31	38	-0.0956072	-0.14212	CA	53.04	51.75
6898	An-1	31.1	46.9	-0.168822	0.0558189	Admix	51.2167	4.4
6964	Spr1-2	31.2	43.2	0.117032	-0.00253597	Admix	56.3	16
8265	Blh-1	31.6	40.7	0.140028	0.00668489	WE	48	19
7323	Rubezhnoe-1	31.7	37	-0.0596266	-0.119519	CA	49	38.28
7035	Blh-2	31.8	31.7	0.0780366	-0.383053	EE	48	19
7094	Da-0	31.8	34.4	0.143251	0.0256856	Admix	49.8724	8.65081
CS76417	Qui-0	31.9	24.4	-0.15103	-0.376262	Admix	42.69	-6.93
CS76355	Castelfed-4	32	46.2	-0.0661886	0.134711	Admix	46.34	11.29
CS76370	Petro-1	32.3	36.5	0.101616	-0.210751	EE	44.34	21.46
CS76363	Moran-1	32.5	44.2	0.479099	0.0707192	SE	39.83	16.17
6975	Uod-1	32.6	32.8	0.205663	-0.247563	EE	48.3	14.45
CS76394	Yeg-1	32.6	33.2	-0.298243	-0.176648	CA	39.87	45.36
CS76424	Timpo-1	32.7	47	0.0741569	0.100861	SE	39.27	16.27
6903	Bor-4	32.8	40.3	-0.122968	0.0966546	EE	49.4013	16.2326
7210	La-1	33.5	41	-0.0981334	-0.0649477	Admix	52.7333	15.2333
6985	Zdr-6	33.7	39.5	-0.0175857	-0.0352741	EE	49.3853	16.2544
CS76419	Slavi-1	33.9	34.7	0.0846386	-0.123829	Admix	41.43	23.65
7297	Pf-0	34.2	51.3	-0.105322	0.222858	WE	48.5479	9.11033
7199	Kl-5	34.6	46.5	-0.13726	0.141903	WE	50.95	6.9666
6980	Ws-0	35.9	39	0.498775	-0.0485966	EE	52.3	30
6936	Lz-0	36	41.2	0.229765	-0.0508118	Admix	46	3.3
7176	Is-1	36.6	36.8	-0.302605	0.0150556	WE	50.5	7.5
6933	Ll-0	37.2	35.1	-0.104689	-0.213304	SE	41.59	2.49
8337	Mir-0	37.2	37.1	0.320257	-0.130958	Admix	44	12.37
6977	Van-0	37.5	51.6	0.0454885	0.14009	Admix	49.3	-123
6009	Eden-1	37.5	53.3	-0.00360787	0.189582	NE	62.877	18.177
8387	St-0	37.6	43.9	0.264686	0.000507664	WE	59	18
6897	Ag-0	37.9	39.4	0.00697056	0.00184424	Admix	45	1.3
6959	REN-1	38	40.8	0.111225	-0.0339349	Admix	48.5	-1.41
CS76412	Fei-0	38.1	45.1	0.63197	0.0157854	Admix	40.92	-8.54
6960	REN-11	38.5	45.2	0.154432	0.0606384	Admix	48.5	-1.41
CS76388	Lerik1-3	38.6	52.7	0.339765	0.206547	SE	38.74	48.61
7178	Jm-1	39	45.6	0.284506	0.0552218	EE	49	15
7519	Omo-2-3	39.3	40.1	0.256732	-0.108292	Admix	56.1509	15.7735
CS76362	Angel-1	39.3	43.2	0.448553	0.0843224	SE	38.62	16.17
CS76406	Rue3-1-31	39.5	41.4	0.307164	-0.0834724	Admix	48.56	9.16
6965	Spr1-6	39.8	43.5	0.167659	0.0539925	Admix	58.4173	14.1576
CS76377	Stepn-2	40	51.7	0.183564	0.0645272	CA	54.09	60.46
7073	Chi-1	40.2	45	-0.146561	-0.0166582	Admix	53.7502	34.7361
7206	Kro-0	40.4	42.7	0.257708	-0.0269874	Admix	50.0742	8.96617
7104	Dra-1	40.4	57.7	-0.0824528	0.218564	EE	49.4167	16.2667
7128	Est-0	41.1	32.7	0.0857597	-0.221739	Admix	58.3	25.3
7106	Dr-0	41.1	33.1	0.0489849	-0.166437	EE	51.051	13.7336
CS76371	Lecho-1	41.4	43.7	0.022284	0.0887388	SE	41.43	23.5
CS76360	Ciste-2	42.4	48.8	0.226338	0.0751709	SE	41.62	12.87
6984	Zdr-1	43.1	43.8	0.442061	0.0802611	EE	49.3853	16.2544
6939	Mt-0	43.8	30.5	0.181991	-0.15157	WE	32.34	22.46
6922	Gu-0	43.9	31.7	0.134874	-0.137473	WE	50.3	8
CS76407	TueV13	43.9	49.3	0.386208	0.230279	Admix	48.52	9.05
CS76376	Kidr-1	44	46.4	-0.107784	-0.00333711	CA	51.31	57.56
7522	Mr-0	44.4	40.3	0.168415	0.0883425	Admix	44.15	9.65
6915	Ei-2	44.6	50.1	0.43079	0.17487	WE	50.3	6.3
6904	Br-0	44.7	44.4	0.0468857	-0.0247306	SE	49.2	16.6166
7158	Gr-5	44.9	45.2	0.255677	0.0495219	Admix	47	15.5
7014	Ba-1	48.2	39.1	0.197477	-0.0944213	WE	56.5459	-4.79821
7135	Fr-4	48.4	43.5	0.187568	0.0185457	Admix	50.1102	8.6822
8389	Ta-0	49.2	36.6	0.267825	-0.127123	EE	49.5	14.5
8366	Rd-0	49.2	42.4	-0.157708	0.0269857	Admix	50.5	8.5
7150	Gu-1	49.4	46.2	0.0487584	0.0921984	WE	50.3	8
8388	Stw-0	49.6	34.9	-0.0227268	-0.193879	EE	52	36
6909	Col-0	53.3	34.9	-0.318432	-0.115045	WE	38.3	-92.3
6942	Nd-1	53.9	35.4	0.151005	-0.157258	WE	50	10
7265	Nd-0	60.1	41.9	0.20118	0.04848	WE	50	10
CS76374	Shigu-2	61.2	48.2	0.501391	0.0484122	CA	53.33	49.48
CS76396	Koch-1	64.9	41.2	0.202834	-0.0181121	Admix	50.36	29.32
CS76375	Shigu-1	65.7	58.1	0.390276	0.22076	CA	53.33	49.48
CS76400	Star-8	69.3	48.1	0.403766	0.0808426	Admix	48.43	8.82
6916	Est-1	70.3	42.7	0.351012	0.0356639	Admix	58.3	25.3
6978	Wa-1	NA	35.9	NA	-0.192587	EE	52.3	21
6944	Nfa-8	NA	42.2	NA	-0.0408592	Admix	51.4083	-0.6383
7169	Hh-0	NA	40	NA	-0.00675905	Admix	54.4175	9.88682
6966	Sq-1	NA	42.5	NA	0.000897218	Admix	51.4083	-0.6383
7172	Hl-3	NA	40.6	NA	0.0114167	WE	52.1444	9.37827
6943	NFA-10	NA	42.9	NA	0.0633002	Admix	51.4083	-0.6383
CS76386	Dog-4	NA	45.6	NA	0.0783797	Admix	38.3	42.22
7164	Hau-0	NA	50.2	NA	0.0897765	Admix	55.675	12.5686
6923	HR-10	NA	48.2	NA	0.108268	Admix	51.4083	-0.6383
CS76385	Kly1	NA	52.4	NA	0.152457	CA	51.34	82.57
aRelative root length (RRL) of A.thaliana accession under Al and proton stress condition. NA indicates missing value due to low germination rate (n ≤ 5). bDifference rate was calculated using the formula log2(observed RRL/predicted RRL). The accessions that showed markedly different observed RRL from predicted RRL (difference rate > |0.5|) were highlighted using bold font and underline. cSubpopul…

## Sheet: Supplementary Table S2
Supplementary Table S2 T-DNA insertion and mutant lines used in this study.
Candidate gene	Line name	Discription
For Al tolerance
AT1G08430	SALK_009629	aluminum-activated malate transporter 1 (ALMT1)
AT5G03670	SALK_108869C	TON1 RECRUITING MOTIF 28 (TRM28)
AT3G51030	SALK_044578C	thioredoxin H-type 1 (TRX1)
AT4G04920	WiscDsLox504A08	SENSITIVE TO FREEZING 6 (SFR6)
AT4G14040	SALK_058073C	selenium-binding protein 2 (SBP2)
AT5G28850	ET4528	Calcium-binding EF-hand family protein
AT5G47050	SALK_128070C	SBP (S-ribonuclease binding protein) family protein
AT3G57200	SALK_019185C	glycosyltransferase-like protein
AT2G16980	SALK_068810C	Major facilitator superfamily protein
AT3G03240	SALK_124477C	alpha/beta-Hydrolases superfamily protein
AT3G05370	SALK_094160C	receptor like protein 31 (RLP31)
AT5G19460	SALK_008103C	nudix hydrolase homolog 20 (NUDT20)
AT1G30825	N127	Arp2/3 complex_ 34 kD subunit p34-Arc
AT5G54550	SALK_055653C	Protein of unknown function (DUF295)
AT4G06534	SALK_068724C	transmembrane protein
AT4G03560	SALK_145413	two-pore channel 1 (TPC1)
AT3G24495	SALK_200886C	MUTS homolog 7 (MSH7)
AT3G42800	SALK_064131	AF-like protein
AT5G24110	SALK_090390	WRKY DNA-binding protein 30 (WRKY30)
AT3G05545	SALK_089110C	RING/U-box superfamily protein
AT2G15500	SAIL_107_F12	RNA-binding protein
AT3G03250	SALK_100183C	UDP-GLUCOSE PYROPHOSPHORYLASE 1 (UGP1)
AT3G05937	SAIL_111B11	unknown protein
AT3G05320	SALK_151675C	O-fucosyltransferase family protein
AT5G24230	SALK_011387C	Lipase class 3-related protein
AT4G04540	SALK_036225C	cysteine-rich RLK (RECEPTOR-like protein kinase) 39 (CRK39)
AT2G34660	mrp2	multidrug resistance-associated protein 2 (MRP2)
AT4G26220	SALK_027385C	S-adenosyl-L-methionine-dependent methyltransferases superfamily protein
At4g04710	SALK_125850C	calcium-dependent protein kinase 22 (CPK22)
AT4G04220	SALK_048207C	receptor like protein 46 (RLP46)
AT3G03260	SALK_088578C	homeodomain GLABROUS 8 (HDG8)
AT1G65270	SALK_097162C	ER membrane protein complex subunit-like protein
AT1G08420	SALK_055335	BRI1 suppressor 1 (BSU1)-like 2 (BSL2)
AT4G04260	SALK_204915C	Bromo-adjacent homology (BAH) domain-containing protein
AT4G07390	SALK_151293C	Mannose-P-dolichol utilization defect 1 protein
AT1G30760	SALK_000581C	FAD-binding Berberine family protein
AT3G05330	SALK_033437C	TANGLED (ATN)
AT5G24030	SALK_024849C	SLAC1 homologue 3 (SLAH3)
AT2G34670	SALK_013355C	Protein of unknown function (DUF630 and DUF632)
AT5G28060	SALK_000766	Ribosomal protein S24e family protein
AT3G02410	SALK_124729C	Isoprenylcysteine methylesterase-like 2 (ICME-LIKE2)
AT1G07990	SALK_045848C	SIT4 phosphatase-associated family protein
AT1G32160	SALK_030328C	Protein of unknown function (DUF760)
AT4G23100	pad2-1	glutamate-cysteine ligase (GSH1)
AT4G07408	SALK_203559C	unknown protein
For proton tolerance
AT5G59613	SALK_114006C	ATP synthase
AT3G13682	SALK_135831C	LSD1-like2 (LDL2)
AT2G25520	SALK_024802C	Drug/metabolite transporter superfamily protein
AT5G03320	SAIL_129_D02	PATTERN-TRIGGERED IMMUNITY COMPROMISED RECEPTOR-LIKE CYTOPLASMIC KINASE 2 (PCRK2)
AT4G13420	SALK_014177	high affinity K+ transporter 5 (HAK5)
AT4G32680	SALK_034959C	transmembrane protein
AT1G30290	SALK_038915C	Tetratricopeptide repeat (TPR)-like superfamily protein
AT4G11890	SALK_037588C	Protein kinase superfamily protein
AT5G51770	SALK_075797C	Protein kinase superfamily protein
AT4G17620	SALK_207001C	glycine-rich protein
AT1G30300	SALK_024108C	Metallo-hydrolase/oxidoreductase superfamily protein
AT5G26850	SALK_044413C	Uncharacterized protein
AT5G37490	SALK_202576C	ARM repeat superfamily protein
AT1G34630	SALK_096103C	BEST Arabidopsis thaliana protein match is: Mitochondrial import inner membrane translocase subunit Tim17/Tim22/Tim23 family protein (TAIR:AT5G51150.1)
AT3G27100	SALK_141684C	ENY2
AT2G01690	SALK_033424C	ARM repeat superfamily protein
AT1G62540	SALK_098896C	flavin-monooxygenase glucosinolate S-oxygenase 2 (FMO GS-OX2)
AT1G32170	SALK_107196C	xyloglucan endotransglucosylase/hydrolase 30 (XTH30)
AT3G27785	SALK_111812C	myb domain protein 118 (MYB118)
AT3G11460	SAIL_844_A11	Pentatricopeptide repeat (PPR) superfamily protein
AT5G59520	SALK_045578C	ZRT/IRT-like protein 2 (ZIP2)
AT4G13510	amt1-1	ammonium transporter 1;1 (AMT1;1)
AT2G25540	SALK_052533C	cellulose synthase 10 (CESA10)
AT1G20320	SALK_133629C	Haloacid dehalogenase-like hydrolase (HAD) superfamily protein
AT5G24300	SALK_201985C	STARCH SYNTHASE 1 (SS1)
AT4G17650	SALK_059981C	Polyketide cyclase / dehydrase and lipid transport protein
AT2G34660	mrp2	multidrug resistance-associated protein 2 (MRP2)
AT2G29080	SALK_206022C	FTSH protease 3 (ftsh3)
AT1G64235	GK-523E10	Bifunctional inhibitor/lipid-transfer protein/seed storage 2S albumin superfamily protein
AT4G32700	SALK_035610C	helicases
AT3G17710	SALK_038051C	F-box and associated interaction domains-containing protein
AT1G23205	SALK_201795C	Plant invertase/pectin methylesterase inhibitor superfamily protein
AT3G29575	SALK_052114C	ABI five binding protein 3 (AFP3)
AT4G10720	SALK_109179C	Ankyrin repeat family protein
AT3G28155	SALK_119862C	BEST Arabidopsis thaliana protein match is: ARM repeat superfamily protein (TAIR:AT2G35630.1)
AT3G17700	SALK_129133C	cyclic nucleotide-binding transporter 1 (CNBT1)
AT3G07820	SALK_145242C	Pectin lyase-like superfamily protein
AT1G47530	SALK_084030C	MATE efflux family protein

## Sheet: Supplementary Table S3
Supplementary Table S3 PCR primer sequences
Object		Name	Sequence (5'-)
ALMT1promoter::GUS	Col-0 and Bil-7	SfiIC-ALMTPromF2235	F	GCTTGGCCTGCTTGGCCGGCAGATAAAGAGGCACTCGTGCA
		ALMTProm(ATG)GUS	R	GGGGTTTCTACAGGACGTAACATAACACCTTTTGATGGTCACT
	Col-0 -TE	ALMT1P_up_TE	R	CAGGTTCAAAACTAATCAAAACTTTTTTTTTTTAATCAC
		ALMT1P_down_TE	F	GTTTTGATTAGTTTTGAACCTGATGATGTATTG
	Col-0_-491_TtoG	ALMT1P_-491_TtoG	F	CAGAAACGAAATGATTTGGGGAAGC
		ALMT1P_-491_TtoG	R	GCTTCCCCAAATCATTTCGTTTCTG
	GUS	GUS	F	ATGTTACGTCCTGTAGAAACCCC
		Sfi1D-Nos-terminator	R	AATTCGGCCGCGACGGCCCCCGATCTAGTAACATAGATGAC
Sequence analysis for AtALMT1 promoter	Amplification and sequence	At1g08430prom-2355	F	TAGTCCATAGTTATTGACCTGAAAC
		At1g08430_ATG+82bp	R	GACTTGCTCTTGTTTTGGTCTCTTC
	Sequence	At1g08430 PromUp-F0	F	GGGGGGGCTTTTGTGTATTTTAATTT
		ALMT1P_seq-1643	R	GATGGACTCAGTCACTCGATTTG
		At1g08430PromSeq-1476	F	TGGAGGATCAGATGGTTGAAGTTA
		At1g08430PromSeq-1006	F	ACCTAAGACAAGAGACTACTATTA
		ALMT1seq-580	R	TGGGAACAAACAAGTAGATGGCA
		At1g08430PromSeq-F2	F	AACTTACTGGGCTAGGTTCGACT
		At1g08430PromSeq-R2	R	CATCGATCCATGTACATAAAAACAAC
Expression analysis	AtUBQ1	At3g52590-realtime-F	F	AGAGCTGTCAACTGCAGGAAGAA
		At3g52590-realtime-R	R	ACAAGAAAAACAAACCCTATCAAAGG
	AtALMT1	At1g08430-realtime-F	F	CACAGTTTTACATGACGTTGATAATGAT
		At1g08430-realtime-R	R	TCTTCATGTTTTTCATGGTTTGAGTT
	AtSAND	At2g28390-realtime-F	F	GGGACCCCACAAGACTCAATA
		At2g28390-realtime-R	R	CATCTTTTACCCTTTGGCACAC
	AtTRM28	At5g03670_realtime_F	F	CAGAGGAATTGCCAAGCGAC
		At5g03670_realtime_R	R	TGTTTGACTCCACATCTCTCCAAG
	AtTRX1	At3g51030-realtime-F	F	GCCAAGTGTTTGGCAATGGTAG
		At3g51030-realtime-R	R	CAAGTGATTGGGCGATACAGG
	AtSFR6	At4g04920_realtime-F	F	GGTGCCACTAAGCAGCCAAATC
		At4g04920_realtime-R	R	CCACACATGGGGCAGCAATAAAC

## Sheet: Supplementary Table S4
Supplementary Table S4 AtALMT1 expression level and promoter haplotype of 71 accessions
EcoID	Hap	Relative AtALMT1 expression (AtALMT1/AtSAND/Col-0)	Distance from ATG
			-2221	-1963	-1937	-1924	-1831	-1824	-1669	-1570	-1485	-1485	-1481	-1465	-1397	-1383	TE	-789	-704	-701	-627	-514	-491	-243
6904	Hap1	0.59	C	T	C	G	T	-	C	G	A	-	A	A	G	A	-	A	T	T	G	C	G	-
6910	Hap1	0.54	C	T	C	G	T	-	C	G	A	-	A	A	G	A	-	A	T	T	G	C	G	-
6939	Hap1	0.77	C	T	C	G	T	-	C	G	A	-	A	A	G	A	-	A	T	T	G	C	G	-
7100	Hap1	0.57	C	T	C	G	T	-	C	G	A	-	A	A	G	A	-	A	T	T	G	C	G	-
7176	Hap1	0.76	C	T	C	G	T	-	C	G	A	-	A	A	G	A	-	A	T	T	G	C	G	-
7373	Hap1	0.49	C	T	C	G	T	-	C	G	A	-	A	A	G	A	-	A	T	T	G	C	G	-
7378	Hap1	0.78	C	T	C	G	T	-	C	G	A	-	A	A	G	A	-	A	T	T	G	C	G	-
8374	Hap1	0.55	C	T	C	G	T	-	C	G	A	-	A	A	G	A	-	A	T	T	G	C	G	-
8395	Hap1	0.42	C	T	C	G	T	-	C	G	A	-	A	A	G	A	-	A	T	T	G	C	G	-
6942	Hap1	0.52	C	T	C	G	T	-	C	G	A	-	A	A	G	A	-	A	T	T	G	C	G	-
6996	Hap1	0.71	C	T	C	G	T	-	C	G	A	-	A	A	G	A	-	A	T	T	G	C	G	-
7014	Hap1	0.68	C	T	C	G	T	-	C	G	A	-	A	A	G	A	-	A	T	T	G	C	G	-
7192	Hap1	0.96	C	T	C	G	T	-	C	G	A	-	A	A	G	A	-	A	T	T	G	C	G	-
8388	Hap1	0.6	C	T	C	G	T	-	C	G	A	-	A	A	G	A	-	A	T	T	G	C	G	-
CS76388	Hap1	0.64	C	T	C	G	T	-	C	G	A	-	A	A	G	A	-	A	T	T	G	C	G	-
CS76392	Hap1	0.43	C	T	C	G	T	-	C	G	A	-	A	A	G	A	-	A	T	T	G	C	G	-
6980	Hap3	1.22	C	T	C	G	T	-	C	C	A	-	A	A	G	A	-	A	T	T	G	C	T	-
7206	Hap3	0.48	C	T	C	G	T	-	C	C	A	-	A	A	G	A	-	A	T	T	G	C	T	-
7151	Hap3	0.57	C	T	C	G	T	-	C	C	A	-	A	A	G	A	-	A	T	T	G	C	T	-
7323	Hap3	0.79	C	T	C	G	T	-	C	C	A	-	A	A	G	A	-	A	T	T	G	C	T	-
CS76378	Hap3	1.08	C	T	C	G	T	-	C	C	A	-	A	A	G	A	-	A	T	T	G	C	T	-
CS76394	Hap3	0.8	C	T	C	G	T	-	C	C	A	-	A	A	G	A	-	A	T	T	G	C	T	-
CS76421	Hap3	0.96	C	T	C	G	T	-	C	C	A	-	A	A	G	A	-	A	T	T	G	C	T	-
CS76422	Hap3	0.79	C	T	C	G	T	-	C	C	A	-	A	A	G	A	-	A	T	T	G	C	T	-
7078	Hap4	0.82	C	T	C	G	T	-	C	C	A	-	A	A	G	A	-	A	T	T	G	C	G	-
CS76374	Hap4	0.74	C	T	C	G	T	-	C	C	A	-	A	A	G	A	-	A	T	T	G	C	G	-
6929	Hap4	0.46	C	T	C	G	T	-	C	C	A	-	A	A	G	A	-	A	T	T	G	C	G	-
6963	Hap4	0.83	C	T	C	G	T	-	C	C	A	-	A	A	G	A	-	A	T	T	G	C	G	-
CS76362	Hap4	0.88	C	T	C	G	T	-	C	C	A	-	A	A	G	A	-	A	T	T	G	C	G	-
CS76368	Hap4	0.42	C	T	C	G	T	-	C	C	A	-	A	A	G	A	-	A	T	T	G	C	G	-
CS76375	Hap4	0.52	C	T	C	G	T	-	C	C	A	-	A	A	G	A	-	A	T	T	G	C	G	-
CS76379	Hap4	0.38	C	T	C	G	T	-	C	C	A	-	A	A	G	A	-	A	T	T	G	C	G	-
6901		0.55	C	-	C	G	T	-	C	C	A	-	A	A	G	A	-	A	T	T	G	C	G	-
6940		0.56	C	T	C	G	T	-	C	C	A	-	A	A	G	A	-	A	T	T	G	C	G	T
7094		0.49	C	-	C	C	T	-	C	C	A	-	A	A	G	-	-	A	T	T	G	C	G	-
8270		0.49	C	-	C	C	T	-	C	C	A	-	A	A	G	-	-	A	T	T	G	C	G	-
8271		0.81	C	T	C	G	T	-	C	C	A	-	A	A	G	A	-	A	T	T	G	C	G	T
8274		0.68	C	-	C	C	T	-	C	C	A	-	A	A	G	A	-	A	T	T	G	C	G	T
6930		0.71	C	-	C	C	T	-	C	C	A	-	A	A	G	A	-	A	T	T	G	C	G	-
6971		0.4	C	-	C	C	T	-	C	C	A	-	A	A	G	-	-	A	T	T	G	C	G	-
8389		0.51	C	-	C	C	T	-	C	C	A	-	A	A	G	A	-	A	T	T	G	C	G	-
CS76360		0.49	C	-	C	C	T	-	C	C	A	-	A	A	G	-	-	A	T	T	G	C	G	-
CS76367		0.54	C	-	C	C	T	-	C	C	A	-	A	A	G	-	-	A	T	T	G	C	G	-
CS76381		0.4	C	-	C	C	T	-	C	C	A	-	A	A	G	A	-	A	T	T	G	C	G	-
6009	Hap2	0.79	C	-	C	C	G	GGGGG	T	C	-	-	A	A	G	A	+	-	T	C	G	C	T	-
6909	Hap2	1	C	-	C	C	G	GGGGG	T	C	-	-	A	A	G	A	+	-	T	C	G	C	T	-
6916	Hap2	0.53	C	-	C	C	G	GGGGG	T	C	-	-	A	A	G	A	+	-	T	C	G	C	T	-
6922	Hap2	0.69	C	-	C	C	G	GGGGG	T	C	-	-	A	A	G	A	+	-	T	C	G	C	T	-
7004	Hap2	0.58	C	-	C	C	G	GGGGG	T	C	-	-	A	A	G	A	+	-	T	C	G	C	T	-
7135	Hap2	0.89	C	-	C	C	G	GGGGG	T	C	-	-	A	A	G	A	+	-	T	C	G	C	T	-
7150	Hap2	0.96	C	-	C	C	G	GGGGG	T	C	-	-	A	A	G	A	+	-	T	C	G	C	T	-
7199	Hap2	1.04	C	-	C	C	G	GGGGG	T	C	-	-	A	A	G	A	+	-	T	C	G	C	T	-
8366	Hap2	0.76	C	-	C	C	G	GGGGG	T	C	-	-	A	A	G	A	+	-	T	C	G	C	T	-
CS76400	Hap2	0.94	C	-	C	C	G	GGGGG	T	C	-	-	A	A	G	A	+	-	T	C	G	C	T	-
5837		0.44	C	-	C	C	T	-	C	C	A	A	T	C	C	A	+	A	-	T	G	A	G	-
6906		0.44	T	-	C	G	T	-	C	C	A	-	A	A	G	A	+	A	T	T	G	C	G	-
6932		0.47	C	-	C	C	T	-	C	C	A	A	T	C	C	-	+	A	-	T	G	A	G	-
6979		0.46	C	-	C	C	T	-	C	C	A	A	T	C	C	-	+	A	-	T	G	A	G	-
6984		0.7	T	-	C	C	T	-	C	C	A	-	A	A	G	A	+	A	T	T	G	C	G	T
7033		0.55	C	-	C	C	T	-	C	C	A	A	T	C	C	-	+	A	-	T	G	A	G	-
7104		0.89	T	-	C	C	T	-	C	C	A	-	A	A	G	A	+	A	T	T	G	C	G	T
7105		0.72	T	-	C	C	T	-	C	C	A	-	A	A	G	A	+	A	T	T	G	C	G	T
7520		0.44	C	-	C	C	T	-	C	C	A	A	T	C	C	-	+	A	-	T	G	A	G	-
8300		0.43	C	-	C	C	T	-	C	C	A	A	T	C	C	-	+	A	-	T	G	A	G	-
8314		0.46	C	-	C	C	T	-	C	C	A	A	T	C	C	-	+	A	-	T	G	A	G	-
8329		0.5	T	-	C	G	T	-	C	C	A	-	A	A	G	A	+	A	T	T	G	C	G	-
CS76371		0.76	C	-	T	A	T	-	C	C	A	-	A	A	G	A	+	A	T	T	A	C	G	-
CS76383		0.35	C	-	T	A	T	-	C	C	A	-	A	A	G	A	+	A	T	T	A	C	G	-
CS76384		0.43	C	-	T	A	T	-	C	C	A	-	A	A	G	A	+	A	T	T	A	C	G	-
CS76419		0.75	C	-	T	A	T	-	C	C	A	-	A	A	G	A	+	A	T	T	A	C	G	-
CS76426		0.61	C	-	T	A	T	-	C	C	A	-	A	A	G	A	+	A	T	T	A	C	G	-

## Sheet: Supplementary Table S5
Supplementary Table S5 List of genes located within 10 Kb of the top 140 SNPs in GWAS of Al tolerance
AGI code	Discription	SNP (Chr_position)	P-value	rank	Minor		Major		markerR2	SNP location	located within LD block
					RRL (%)	N/allele	RRL (%)	N/allele
AT4G13270	Late embryogenesis abundant (LEA) hydroxyproline-rich glycoprotein family	4_7736379	2.9e-06	1	42.575	12/T	27.8148	183/C	0.122332	3178
AT4G13280	terpenoid synthase 12 (TPS12)	4_7736379	2.9e-06	1	42.575	12/T	27.8148	183/C	0.122332	Exon	✔
AT4G13290	cytochrome P450_family 71	4_7736379	2.9e-06	1	42.575	12/T	27.8148	183/C	0.122332	-1904	✔
AT4G13300	terpenoid synthase 13 (TPS13)	4_7736379	2.9e-06	1	42.575	12/T	27.8148	183/C	0.122332	6492
AT4G04695	calcium-dependent protein kinase 31 (CPK31)	4_2393077	5.5e-06	2	37.2718	39/A	26.7314	153/G	0.114564	-7081
AT4G04700	calcium-dependent protein kinase 27 (CPK27)	4_2393077	5.5e-06	2	37.2718	39/A	26.7314	153/G	0.114564	-3091
AT4G04710	calcium-dependent protein kinase 22 (CPK22)	4_2393077	5.5e-06	2	37.2718	39/A	26.7314	153/G	0.114564	Prom	✔
AT4G04720	calcium-dependent protein kinase 21 (CPK21)	4_2393077	5.5e-06	2	37.2718	39/A	26.7314	153/G	0.114564	1381
AT4G04730	unknown protein	4_2393077	5.5e-06	2	37.2718	39/A	26.7314	153/G	0.114564	8850
AT4G05620	Galactose oxidase/kelch repeat superfamily protein	4_2983439	1e-05	4	37.3696	23/A	27.7006	172/C	0.108043	1612	✔
AT4G05630	unknown protein	4_2983439	1e-05	4	37.3696	23/A	27.7006	172/C	0.108043	5009
AT4G05631	unknown protein	4_2983439	1e-05	4	37.3696	23/A	27.7006	172/C	0.108043	6567
AT4G13270	Late embryogenesis abundant (LEA) hydroxyproline-rich glycoprotein family	4_7738614	1.9e-05	5	39.7	14/G	27.874	181/C	0.10122	5413
AT4G13280	terpenoid synthase 12 (TPS12)	4_7738614	1.9e-05	5	39.7	14/G	27.874	181/C	0.10122	Prom	✔
AT4G13290	cytochrome P450_family 71	4_7738614	1.9e-05	5	39.7	14/G	27.874	181/C	0.10122	Prom	✔
AT4G13300	terpenoid synthase 13 (TPS13)	4_7738614	1.9e-05	5	39.7	14/G	27.874	181/C	0.10122	4257
AT4G13310	cytochrome P450_family 71	4_7738614	1.9e-05	5	39.7	14/G	27.874	181/C	0.10122	-9691
AT1G08380	photosystem I subunit O (PSAO)	1_2652210	2.6e-05	6	41.0895	19/G	27.4337	175/A	0.0977197	-8382
AT1G08390	unknown protein	1_2652210	2.6e-05	6	41.0895	19/G	27.4337	175/A	0.0977197	8925
AT1G08400	RINT-1 / TIP-1 family	1_2652210	2.6e-05	6	41.0895	19/G	27.4337	175/A	0.0977197	-4175
AT1G08410	P-loop containing nucleoside triphosphate hydrolases superfamily protein	1_2652210	2.6e-05	6	41.0895	19/G	27.4337	175/A	0.0977197	2831
AT1G08420	BRI1 suppressor 1 (BSU1)-like 2 (BSL2)	1_2652210	2.6e-05	6	41.0895	19/G	27.4337	175/A	0.0977197	Intron	✔
AT1G08430	aluminum-activated malate transporter 1 (ALMT1)	1_2652210	2.6e-05	6	41.0895	19/G	27.4337	175/A	0.0977197	-4506
AT1G08440	Aluminium activated malate transporter family protein	1_2652210	2.6e-05	6	41.0895	19/G	27.4337	175/A	0.0977197	-8817
AT5G35200	ENTH/ANTH/VHS superfamily protein	5_13469534	2.9e-05	7	38.0633	30/A	27.1436	165/G	0.0960395	-1483	✔
AT5G35210	metalloendopeptidases	5_13469534	2.9e-05	7	38.0633	30/A	27.1436	165/G	0.0960395	4662
AT4G05310	Ubiquitin-like superfamily protein	4_2722601	3.8e-05	8	38.055	20/C	27.7403	176/T	0.0927517	6589	✔
AT4G05320	polyubiquitin 10 (UBQ10)	4_2722601	3.8e-05	8	38.055	20/C	27.7403	176/T	0.0927517	2293	✔
AT4G05330	ARF-GAP domain 13 (AGD13)	4_2722601	3.8e-05	8	38.055	20/C	27.7403	176/T	0.0927517	Intron	✔
AT4G05340	P-loop containing nucleoside triphosphate hydrolases superfamily protein	4_2722601	3.8e-05	8	38.055	20/C	27.7403	176/T	0.0927517	-1089	✔
AT4G05350	RING/U-box superfamily protein	4_2722601	3.8e-05	8	38.055	20/C	27.7403	176/T	0.0927517	4309	✔
AT4G05360	Zinc knuckle (CCHC-type) family protein	4_2722601	3.8e-05	8	38.055	20/C	27.7403	176/T	0.0927517	-3603	✔
AT5G24210	alpha/beta-Hydrolases superfamily protein	5_8229439	3.8e-05	9	33.6189	74/C	25.8656	122/G	0.0927039	9820
AT5G24220	Lipase class 3-related protein	5_8229439	3.8e-05	9	33.6189	74/C	25.8656	122/G	0.0927039	1888
AT5G24230	Lipase class 3-related protein	5_8229439	3.8e-05	9	33.6189	74/C	25.8656	122/G	0.0927039	Intron	✔
AT5G24240	Phosphatidylinositol 3- and 4-kinase	5_8229439	3.8e-05	9	33.6189	74/C	25.8656	122/G	0.0927039	1503
AT5G24250	unknown protein	5_8229439	3.8e-05	9	33.6189	74/C	25.8656	122/G	0.0927039	4257
AT5G24260	prolyl oligopeptidase family protein	5_8229439	3.8e-05	9	33.6189	74/C	25.8656	122/G	0.0927039	5284
AT5G24270	SALT OVERLY SENSITIVE 3 (SOS3)	5_8229439	3.8e-05	9	33.6189	74/C	25.8656	122/G	0.0927039	9095
AT4G03520	ATHM2	4_1574750	4.6e-05	11	33.95	54/A	26.8317	142/G	0.0907777	-8558
AT4G03540	Uncharacterised protein family (UPF0497)	4_1574750	4.6e-05	11	33.95	54/A	26.8317	142/G	0.0907777	3267
AT4G03550	glucan synthase-like 5 (GSL05)	4_1574750	4.6e-05	11	33.95	54/A	26.8317	142/G	0.0907777	Exon	✔
AT4G03560	two-pore channel 1 (TPC1)	4_1574750	4.6e-05	11	33.95	54/A	26.8317	142/G	0.0907777	-3306
AT4G03565	Cystatin/monellin superfamily protein	4_1574750	4.6e-05	11	33.95	54/A	26.8317	142/G	0.0907777	-9997
AT5G24090	chitinase A (CHIA)	5_8153590	5.3e-05	12	41.5706	17/A	27.5793	179/G	0.0892424	-6338
AT5G24100	Leucine-rich repeat protein kinase family protein	5_8153590	5.3e-05	12	41.5706	17/A	27.5793	179/G	0.0892424	2282
AT5G24105	arabinogalactan protein 41 (AGP41)	5_8153590	5.3e-05	12	41.5706	17/A	27.5793	179/G	0.0892424	723	✔
AT5G24110	WRKY DNA-binding protein 30 (WRKY30)	5_8153590	5.3e-05	12	41.5706	17/A	27.5793	179/G	0.0892424	Exon	✔
AT5G24120	sigma factor E (SIGE)	5_8153590	5.3e-05	12	41.5706	17/A	27.5793	179/G	0.0892424	3961
AT5G24130	unknown protein	5_8153590	5.3e-05	12	41.5706	17/A	27.5793	179/G	0.0892424	-6623
AT1G08380	photosystem I subunit O (PSAO)	1_2653132	5.3e-05	13	44.0071	14/T	27.6225	182/C	0.0892328	-9304
AT1G08390	unknown protein	1_2653132	5.3e-05	13	44.0071	14/T	27.6225	182/C	0.0892328	9847
AT1G08400	RINT-1 / TIP-1 family	1_2653132	5.3e-05	13	44.0071	14/T	27.6225	182/C	0.0892328	-5097
AT1G08410	P-loop containing nucleoside triphosphate hydrolases superfamily protein	1_2653132	5.3e-05	13	44.0071	14/T	27.6225	182/C	0.0892328	3753
AT1G08420	BRI1 suppressor 1 (BSU1)-like 2 (BSL2)	1_2653132	5.3e-05	13	44.0071	14/T	27.6225	182/C	0.0892328	Exon	✔
AT1G08430	aluminum-activated malate transporter 1 (ALMT1)	1_2653132	5.3e-05	13	44.0071	14/T	27.6225	182/C	0.0892328	-3584
AT1G08440	Aluminium activated malate transporter family protein	1_2653132	5.3e-05	13	44.0071	14/T	27.6225	182/C	0.0892328	-7895
AT1G08400	RINT-1 / TIP-1 family	1_2657131	5.5e-05	14	48.23	10/T	27.7478	186/C	0.0887774	-9096
AT1G08410	P-loop containing nucleoside triphosphate hydrolases superfamily protein	1_2657131	5.5e-05	14	48.23	10/T	27.7478	186/C	0.0887774	7752
AT1G08420	BRI1 suppressor 1 (BSU1)-like 2 (BSL2)	1_2657131	5.5e-05	14	48.23	10/T	27.7478	186/C	0.0887774	11	✔
AT1G08430	aluminum-activated malate transporter 1 (ALMT1)	1_2657131	5.5e-05	14	48.23	10/T	27.7478	186/C	0.0887774	Prom	✔
AT1G08440	Aluminium activated malate transporter family protein	1_2657131	5.5e-05	14	48.23	10/T	27.7478	186/C	0.0887774	-3896
AT1G08410	P-loop containing nucleoside triphosphate hydrolases superfamily protein	1_2658099	5.5e-05	15	48.23	10/C	27.7478	186/T	0.0887774	8720
AT1G08420	BRI1 suppressor 1 (BSU1)-like 2 (BSL2)	1_2658099	5.5e-05	15	48.23	10/C	27.7478	186/T	0.0887774	979	✔
AT1G08430	aluminum-activated malate transporter 1 (ALMT1)	1_2658099	5.5e-05	15	48.23	10/C	27.7478	186/T	0.0887774	Prom	✔
AT1G08440	Aluminium activated malate transporter family protein	1_2658099	5.5e-05	15	48.23	10/C	27.7478	186/T	0.0887774	-2928
AT1G08450	calreticulin 3 (CRT3)	1_2658099	5.5e-05	15	48.23	10/C	27.7478	186/T	0.0887774	9699
AT1G07970	Cytochrome B561-related	1_2482473	6.9e-05	16	47.6091	11/C	27.6741	185/G	0.0862861	-7845
AT1G07980	nuclear factor Y_ subunit C10 (NF-YC10)	1_2482473	6.9e-05	16	47.6091	11/C	27.6741	185/G	0.0862861	-5546
AT1G07985	function unknown	1_2482473	6.9e-05	16	47.6091	11/C	27.6741	185/G	0.0862861	6318
AT1G07990	SIT4 phosphatase-associated family protein	1_2482473	6.9e-05	16	47.6091	11/C	27.6741	185/G	0.0862861	Exon	✔
AT1G08000	GATA transcription factor 10 (GATA10)	1_2482473	6.9e-05	16	47.6091	11/C	27.6741	185/G	0.0862861	767
AT1G08005	SIT4 phosphatase-associated family protein	1_2482473	6.9e-05	16	47.6091	11/C	27.6741	185/G	0.0862861	-871
AT1G08010	GATA transcription factor 11 (GATA11)	1_2482473	6.9e-05	16	47.6091	11/C	27.6741	185/G	0.0862861	3433
AT1G08030	tyrosylprotein sulfotransferase (TPST)	1_2482473	6.9e-05	16	47.6091	11/C	27.6741	185/G	0.0862861	7028
AT1G08032	unknown protein	1_2482473	6.9e-05	16	47.6091	11/C	27.6741	185/G	0.0862861	-9650
AT1G08035	unknown protein	1_2482473	6.9e-05	16	47.6091	11/C	27.6741	185/G	0.0862861	-9929
AT4G04955	allantoinase (ALN)	4_2536500	7.6e-05	17	37.25	28/G	27.3833	168/A	0.0852958	-9220
AT4G04957	FUNCTIONS IN: molecular	4_2536500	7.6e-05	17	37.25	28/G	27.3833	168/A	0.0852958	-7138
AT4G04960	Concanavalin A-like lectin protein kinase family protein	4_2536500	7.6e-05	17	37.25	28/G	27.3833	168/A	0.0852958	1114
AT4G04970	glucan synthase-like 1 (GSL1)	4_2536500	7.6e-05	17	37.25	28/G	27.3833	168/A	0.0852958	Prom	✔
AT4G04980	unknown protein	4_2536500	7.6e-05	17	37.25	28/G	27.3833	168/A	0.0852958	7710
AT4G04540	cysteine-rich RLK (RECEPTOR-like protein kinase) 39 (CRK39)	4_2265673	9.2e-05	19	39.7438	16/G	27.9046	174/C	0.084355	3535	✔
AT5G28060	Ribosomal protein S24e family protein	5_10065630	9.4e-05	20	24.2385	52/G	30.4375	144/A	0.0830407	3916	✔
AT4G06526	nucleic acid binding	4_3320883	9.8e-05	21	34.4594	32/A	27.6889	162/G	0.0827568	Exon	✔
AT5G28210	mRNA capping enzyme family protein	5_10190585	0.0001	22	35.8277	47/A	26.5738	149/G	0.082185	122	✔
AT5G28220	Protein prenylyltransferase superfamily protein	5_10190585	0.0001	22	35.8277	47/A	26.5738	149/G	0.082185	Exon	✔
AT5G24120	sigma factor E (SIGE)	5_8171798	0.0001	23	43.8278	18/C	27.3301	176/T	0.0823	-9569
AT5G24130	unknown protein	5_8171798	0.0001	23	43.8278	18/C	27.3301	176/T	0.0823	7732
AT5G24140	squalene monooxygenase 2 (SQP2)	5_8171798	0.0001	23	43.8278	18/C	27.3301	176/T	0.0823	-2125
AT5G24150	SQP1	5_8171798	0.0001	23	43.8278	18/C	27.3301	176/T	0.0823	518	✔
AT5G24155	FAD/NAD(P)-binding oxidoreductase family protein	5_8171798	0.0001	23	43.8278	18/C	27.3301	176/T	0.0823	8320
AT3G05290	peroxisomal adenine nucleotide carrier 1 (PNC1)	3_1519685	0.00012	25	22.2409	22/C	29.6213	174/A	0.0806283	-9983
AT3G05300	Cytidine/deoxycytidylate deaminase family protein	3_1519685	0.00012	25	22.2409	22/C	29.6213	174/A	0.0806283	-9074
AT3G05310	MIRO-related GTP-ase 3 (MIRO3)	3_1519685	0.00012	25	22.2409	22/C	29.6213	174/A	0.0806283	6384	✔
AT3G05320	O-fucosyltransferase family protein	3_1519685	0.00012	25	22.2409	22/C	29.6213	174/A	0.0806283	-2790	✔
AT3G05327	Cyclin family protein	3_1519685	0.00012	25	22.2409	22/C	29.6213	174/A	0.0806283	Prom	✔
AT3G05330	TANGLED (ATN)	3_1519685	0.00012	25	22.2409	22/C	29.6213	174/A	0.0806283	Exon	✔
AT3G05340	Tetratricopeptide repeat (TPR)-like superfamily protein	3_1519685	0.00012	25	22.2409	22/C	29.6213	174/A	0.0806283	3778
AT3G05345	Chaperone DnaJ-domain superfamily protein	3_1519685	0.00012	25	22.2409	22/C	29.6213	174/A	0.0806283	2764
AT3G05350	Metallopeptidase M24 family protein	3_1519685	0.00012	25	22.2409	22/C	29.6213	174/A	0.0806283	7278
AT4G26200	1-amino-cyclopropane-1-carboxylate synthase 7 (ACS7)	4_13285005	0.00012	26	23.466	50/A	30.6171	146/G	0.0800117	7817
AT4G26210	Mitochondrial ATP synthase subunit G protein	4_13285005	0.00012	26	23.466	50/A	30.6171	146/G	0.0800117	1603
AT4G26220	S-adenosyl-L-methionine-dependent methyltransferases superfamily protein	4_13285005	0.00012	26	23.466	50/A	30.6171	146/G	0.0800117	Exon	✔
AT4G26230	Ribosomal protein L31e family protein	4_13285005	0.00012	26	23.466	50/A	30.6171	146/G	0.0800117	Prom	✔
AT4G26240	unknown protein	4_13285005	0.00012	26	23.466	50/A	30.6171	146/G	0.0800117	1769
AT4G26250	galactinol synthase 6 (GolS6)	4_13285005	0.00012	26	23.466	50/A	30.6171	146/G	0.0800117	-2636
AT1G60010	unknown protein	1_22107250	0.00014	27	40.74	10/T	28.1505	186/C	0.0789834	-8673
AT1G60025	MIR426	1_22107250	0.00014	27	40.74	10/T	28.1505	186/C	0.0789834	Prom	✔
AT1G60030	nucleobase-ascorbate transporter 7 (NAT7)	1_22107250	0.00014	27	40.74	10/T	28.1505	186/C	0.0789834	6591
AT1G08420	BRI1 suppressor 1 (BSU1)-like 2 (BSL2)	1_2661045	0.00014	28	43.2733	15/A	27.5928	181/T	0.0785833	3925
AT1G08430	aluminum-activated malate transporter 1 (ALMT1)	1_2661045	0.00014	28	43.2733	15/A	27.5928	181/T	0.0785833	16	✔
AT1G08440	Aluminium activated malate transporter family protein	1_2661045	0.00014	28	43.2733	15/A	27.5928	181/T	0.0785833	Prom	✔
AT1G08450	calreticulin 3 (CRT3)	1_2661045	0.00014	28	43.2733	15/A	27.5928	181/T	0.0785833	6753
AT1G08460	histone deacetylase 8 (HDA08)	1_2661045	0.00014	28	43.2733	15/A	27.5928	181/T	0.0785833	-9406
AT3G04440	Plasma-membrane choline transporter family protein	3_1189789	0.00015	29	23.5972	36/C	29.9553	159/G	0.0782149	9089
AT3G04450	Homeodomain-like superfamily protein	3_1189789	0.00015	29	23.5972	36/C	29.9553	159/G	0.0782149	3429
AT3G04460	peroxin-12 (PEX12)	3_1189789	0.00015	29	23.5972	36/C	29.9553	159/G	0.0782149	311	✔
AT3G04470	Ankyrin repeat family protein	3_1189789	0.00015	29	23.5972	36/C	29.9553	159/G	0.0782149	Exon	✔
AT3G04480	endoribonucleases	3_1189789	0.00015	29	23.5972	36/C	29.9553	159/G	0.0782149	3841
AT3G04490	unknown protein	3_1189789	0.00015	29	23.5972	36/C	29.9553	159/G	0.0782149	-8853
AT5G63550	DEK domain-containing chromatin associated protein	5_25457835	0.00015	30	21.8846	26/C	29.8929	169/T	0.0781695	9663
AT5G63560	FATTY ALCOHOL:CAFFEOYL-COA CAFFEOYL TRANSFERASE (FACT)	5_25457835	0.00015	30	21.8846	26/C	29.8929	169/T	0.0781695	6421
AT5G63570	1-aminomutase	5_25457835	0.00015	30	21.8846	26/C	29.8929	169/T	0.0781695	3994
AT5G63580	flavonol synthase 2 (FLS2)	5_25457835	0.00015	30	21.8846	26/C	29.8929	169/T	0.0781695	1359
AT5G63590	flavonol synthase 3 (FLS3)	5_25457835	0.00015	30	21.8846	26/C	29.8929	169/T	0.0781695	Exon	✔
AT5G63595	flavonol synthase 4 (FLS4)	5_25457835	0.00015	30	21.8846	26/C	29.8929	169/T	0.0781695	1252
AT5G63600	flavonol synthase 5 (FLS5)	5_25457835	0.00015	30	21.8846	26/C	29.8929	169/T	0.0781695	2849
AT5G63610	cyclin-dependent kinase E;1 (CDKE;1)	5_25457835	0.00015	30	21.8846	26/C	29.8929	169/T	0.0781695	5602
AT5G63620	GroES-like zinc-binding alcohol dehydrogenase family protein	5_25457835	0.00015	30	21.8846	26/C	29.8929	169/T	0.0781695	8293
AT4G03520	ATHM2	4_1573906	0.00015	31	38.56	25/G	27.3649	171/T	0.0779649	-7714
AT4G03540	Uncharacterised protein family (UPF0497)	4_1573906	0.00015	31	38.56	25/G	27.3649	171/T	0.0779649	2423
AT4G03550	glucan synthase-like 5 (GSL05)	4_1573906	0.00015	31	38.56	25/G	27.3649	171/T	0.0779649	Exon	✔
AT4G03560	two-pore channel 1 (TPC1)	4_1573906	0.00015	31	38.56	25/G	27.3649	171/T	0.0779649	-4150
AT4G03520	ATHM2	4_1574559	0.00015	32	38.56	25/A	27.3649	171/T	0.0779649	-8367
AT4G03540	Uncharacterised protein family (UPF0497)	4_1574559	0.00015	32	38.56	25/A	27.3649	171/T	0.0779649	3076
AT4G03550	glucan synthase-like 5 (GSL05)	4_1574559	0.00015	32	38.56	25/A	27.3649	171/T	0.0779649	Exon	✔
AT4G03560	two-pore channel 1 (TPC1)	4_1574559	0.00015	32	38.56	25/A	27.3649	171/T	0.0779649	-3497
AT4G04423	unknown protein	4_2212677	0.00015	33	36.44	30/C	27.4354	161/A	0.0792546	8413
AT4G04450	WRKY42	4_2212677	0.00015	33	36.44	30/C	27.4354	161/A	0.0792546	-3702	✔
AT4G04460	Saposin-like aspartyl protease family protein	4_2212677	0.00015	33	36.44	30/C	27.4354	161/A	0.0792546	-9745
AT5G54520	Transducin/WD40 repeat-like superfamily protein	5_22158202	0.00015	34	33.1314	35/G	27.8831	160/C	0.0780617	-7082
AT5G54530	unknown function	5_22158202	0.00015	34	33.1314	35/G	27.8831	160/C	0.0780617	3773
AT5G54531	unknown protein	5_22158202	0.00015	34	33.1314	35/G	27.8831	160/C	0.0780617	3308
AT5G54540	Uncharacterised conserved protein (UCP012943)	5_22158202	0.00015	34	33.1314	35/G	27.8831	160/C	0.0780617	148
AT5G54550	Protein of unknown function (DUF295)	5_22158202	0.00015	34	33.1314	35/G	27.8831	160/C	0.0780617	Prom	✔
AT5G54560	Protein of unknown function (DUF295)	5_22158202	0.00015	34	33.1314	35/G	27.8831	160/C	0.0780617	-932
AT5G54570	beta glucosidase 41 (BGLU41)	5_22158202	0.00015	34	33.1314	35/G	27.8831	160/C	0.0780617	9434
AT3G42800	AF-like protein	3_14902641	0.00016	36	35.3	21/C	28.012	175/T	0.0775421	-589	✔
AT4G07380	unknown protein	4_4202311	0.00016	37	35.5	27/T	27.7213	169/C	0.0770538	-7295
AT4G07390	Mannose-P-dolichol utilization defect 1 protein	4_4202311	0.00016	37	35.5	27/T	27.7213	169/C	0.0770538	4740
AT4G07400	VIER F-box proteine 3 (VFB3)	4_4202311	0.00016	37	35.5	27/T	27.7213	169/C	0.0770538	-800	✔
AT4G07408	unknown protein	4_4202311	0.00016	37	35.5	27/T	27.7213	169/C	0.0770538	1118	✔
AT4G07410	Transducin family protein / WD-40 repeat family protein	4_4202311	0.00016	37	35.5	27/T	27.7213	169/C	0.0770538	Exon	✔
AT4G06490	Protein of unknown function (DUF3287)	4_3119721	0.00016	38	34.1775	40/G	27.4665	155/A	0.0770993	2387	✔
AT3G05350	Metallopeptidase M24 family protein	3_1538238	0.00017	39	22.6476	21/C	29.5303	175/A	0.0767117	-2371
AT3G05360	receptor like protein 30 (RLP30)	3_1538238	0.00017	39	22.6476	21/C	29.5303	175/A	0.0767117	-2950
AT3G05370	receptor like protein 31 (RLP31)	3_1538238	0.00017	39	22.6476	21/C	29.5303	175/A	0.0767117	Exon	✔
AT3G05380	ALWAYS EARLY 2 (ALY2)	3_1538238	0.00017	39	22.6476	21/C	29.5303	175/A	0.0767117	Prom	✔
AT3G05390	S-adenosyl-L-methionine-dependent methyltransferase	3_1538238	0.00017	39	22.6476	21/C	29.5303	175/A	0.0767117	8205
AT3G05400	Major facilitator superfamily protein	3_1538238	0.00017	39	22.6476	21/C	29.5303	175/A	0.0767117	-9348
AT4G04630	DUF584	4_2342848	0.00018	40	40.0833	12/T	28.0565	184/C	0.0761613	-8048
AT4G04632	Protein kinase superfamily protein	4_2342848	0.00018	40	40.0833	12/T	28.0565	184/C	0.0761613	-799	✔
AT4G04640	ATPC1	4_2342848	0.00018	40	40.0833	12/T	28.0565	184/C	0.0761613	7650
AT5G48900	Pectin lyase-like superfamily protein	5_19832314	0.00018	41	34.2909	44/T	27.0901	151/C	0.0763023	3222
AT5G48905	low-molecular-weight cysteine-rich 12 (LCR12)	5_19832314	0.00018	41	34.2909	44/T	27.0901	151/C	0.0763023	527	✔
AT5G48910	LOW PSII ACCUMULATION 66 (LPA66)	5_19832314	0.00018	41	34.2909	44/T	27.0901	151/C	0.0763023	558	✔
AT5G48920	tracheary element differentiation-related 7 (TED7)	5_19832314	0.00018	41	34.2909	44/T	27.0901	151/C	0.0763023	-1023	✔
AT5G48930	hydroxycinnamoyl-CoA shikimate/quinate hydroxycinnamoyl transferase (HCT)	5_19832314	0.00018	41	34.2909	44/T	27.0901	151/C	0.0763023	3985
AT5G48940	RGF1 INSENSITIVE 2 (RGFR2)	5_19832314	0.00018	41	34.2909	44/T	27.0901	151/C	0.0763023	-5396
AT4G06634	zinc finger (C2H2 type) family protein	4_3774267	0.00018	42	35.5741	27/T	27.8335	161/C	0.0773905	-5689	✔
AT4G04960	Concanavalin A-like lectin protein kinase family protein	4_2542053	0.00019	43	37.6957	23/C	27.6092	173/G	0.0757148	6667
AT4G04970	glucan synthase-like 1 (GSL1)	4_2542053	0.00019	43	37.6957	23/C	27.6092	173/G	0.0757148	Exon	✔
AT4G04980	unknown protein	4_2542053	0.00019	43	37.6957	23/C	27.6092	173/G	0.0757148	2157
AT4G04985	Eukaryotic aspartyl protease family protein	4_2542053	0.00019	43	37.6957	23/C	27.6092	173/G	0.0757148	6942
AT5G19420	Regulator of chromosome condensation (RCC1) family with FYVE zinc finger domain	5_6563137	0.00019	44	24.4386	83/G	31.9912	113/C	0.0754776	-7895
AT5G19430	RING/U-box superfamily protein	5_6563137	0.00019	44	24.4386	83/G	31.9912	113/C	0.0754776	7289
AT5G19440	NAD(P)-binding Rossmann-fold superfamily protein	5_6563137	0.00019	44	24.4386	83/G	31.9912	113/C	0.0754776	4795
AT5G19450	calcium-dependent protein kinase 19 (CDPK19)	5_6563137	0.00019	44	24.4386	83/G	31.9912	113/C	0.0754776	Prom	✔
AT5G19460	nudix hydrolase homolog 20 (NUDT20)	5_6563137	0.00019	44	24.4386	83/G	31.9912	113/C	0.0754776	Exon	✔
AT5G19470	nudix hydrolase homolog 24 (NUDT24)	5_6563137	0.00019	44	24.4386	83/G	31.9912	113/C	0.0754776	-1166
AT5G19473	RPM1-interacting protein 4 (RIN4) family protein	5_6563137	0.00019	44	24.4386	83/G	31.9912	113/C	0.0754776	-4057
AT5G19480	unknown protein	5_6563137	0.00019	44	24.4386	83/G	31.9912	113/C	0.0754776	-6364
AT4G06534	unknown protein	4_3365650	0.0002	45	35.2385	39/C	27.1917	157/G	0.0748742	7563
AT4G06536	SPla/RYanodine receptor (SPRY) domain-containing protein	4_3365650	0.0002	45	35.2385	39/C	27.1917	157/G	0.0748742	4395	✔
AT3G03220	expansin A13 (EXPA13)	3_752437	0.0002	46	25.3118	68/C	30.6422	128/A	0.0748173	-6390	✔
AT3G03230	alpha/beta-Hydrolases superfamily protein	3_752437	0.0002	46	25.3118	68/C	30.6422	128/A	0.0748173	-4428	✔
AT3G03240	alpha/beta-Hydrolases superfamily protein	3_752437	0.0002	46	25.3118	68/C	30.6422	128/A	0.0748173	-1837	✔
AT3G03250	UDP-GLUCOSE PYROPHOSPHORYLASE 1 (UGP1)	3_752437	0.0002	46	25.3118	68/C	30.6422	128/A	0.0748173	Intron	✔
AT3G03260	homeodomain GLABROUS 8 (HDG8)	3_752437	0.0002	46	25.3118	68/C	30.6422	128/A	0.0748173	2722	✔
AT3G03270	Adenine nucleotide alpha hydrolases-like superfamily protein	3_752437	0.0002	46	25.3118	68/C	30.6422	128/A	0.0748173	8873
AT1G72640	NAD(P)-binding Rossmann-fold superfamily protein	1_27356233	0.00021	47	39.3227	22/A	27.4615	174/C	0.074427	-5977
AT1G72645	unknown protein	1_27356233	0.00021	47	39.3227	22/A	27.4615	174/C	0.074427	7014
AT1G72650	TRF-like 6 (TRFL6)	1_27356233	0.00021	47	39.3227	22/A	27.4615	174/C	0.074427	2491
AT1G72660	P-loop containing nucleoside triphosphate hydrolases superfamily protein	1_27356233	0.00021	47	39.3227	22/A	27.4615	174/C	0.074427	Exon	✔
AT1G72670	IQ-domain 8 (iqd8)	1_27356233	0.00021	47	39.3227	22/A	27.4615	174/C	0.074427	450
AT1G72680	cinnamyl-alcohol dehydrogenase (CAD1)	1_27356233	0.00021	47	39.3227	22/A	27.4615	174/C	0.074427	2999
AT1G72690	unknown protein	1_27356233	0.00021	47	39.3227	22/A	27.4615	174/C	0.074427	-2921
AT1G72700	ATPase E1-E2 type family protein / haloacid dehalogenase-like hydrolase family protein	1_27356233	0.00021	47	39.3227	22/A	27.4615	174/C	0.074427	-7663
AT5G28210	mRNA capping enzyme family protein	5_10188325	0.00022	48	33.9571	56/T	26.7271	140/C	0.0739441	Prom	✔
AT5G28220	Protein prenylyltransferase superfamily protein	5_10188325	0.00022	48	33.9571	56/T	26.7271	140/C	0.0739441	2032
AT4G04960	Concanavalin A-like lectin protein kinase family protein	4_2544464	0.00024	53	34.6355	62/A	26.2336	131/G	0.0746424	9078
AT4G04970	glucan synthase-like 1 (GSL1)	4_2544464	0.00024	53	34.6355	62/A	26.2336	131/G	0.0746424	1333
AT4G04980	unknown protein	4_2544464	0.00024	53	34.6355	62/A	26.2336	131/G	0.0746424	Intron	✔
AT4G04985	Eukaryotic aspartyl protease family protein	4_2544464	0.00024	53	34.6355	62/A	26.2336	131/G	0.0746424	4531
AT4G04990	Protein of unknown function (DUF761)	4_2544464	0.00024	53	34.6355	62/A	26.2336	131/G	0.0746424	-8626
AT1G30760	FAD-binding Berberine family protein	1_10921888	0.00024	54	20.2143	14/A	29.4527	182/G	0.0731115	1211	✔
AT1G30780	F-box associated ubiquitination effector family protein	1_10921888	0.00024	54	20.2143	14/A	29.4527	182/G	0.0731115	2031	✔
AT1G30790	F-box and associated interaction domains-containing protein	1_10921888	0.00024	54	20.2143	14/A	29.4527	182/G	0.0731115	-8825	✔
AT4G16340	SPIKE1 (SPK1)	4_9246885	0.00025	55	39.0583	12/T	28.1234	184/C	0.0727258	-3568
AT4G16350	calcineurin B-like protein 6 (CBL6)	4_9246885	0.00025	55	39.0583	12/T	28.1234	184/C	0.0727258	-973	✔
AT4G16360	5'-AMP-activated protein kinase beta-2 subunit protein	4_9246885	0.00025	55	39.0583	12/T	28.1234	184/C	0.0727258	Exon	✔
AT4G16370	oligopeptide transporter (OPT3)	4_9246885	0.00025	55	39.0583	12/T	28.1234	184/C	0.0727258	417	✔
AT4G16380	Heavy metal transport/detoxification superfamily protein	4_9246885	0.00025	55	39.0583	12/T	28.1234	184/C	0.0727258	-5670
AT4G16390	pentatricopeptide (PPR) repeat-containing protein	4_9246885	0.00025	55	39.0583	12/T	28.1234	184/C	0.0727258	-9073
AT4G04910	N-ethylmaleimide sensitive factor (NSF)	4_2504668	0.00026	56	33.9907	43/G	27.332	153/A	0.0722037	-6902
AT4G04920	SENSITIVE TO FREEZING 6 (SFR6)	4_2504668	0.00026	56	33.9907	43/G	27.332	153/A	0.0722037	Exon	✔
AT4G04925	unknown protein	4_2504668	0.00026	56	33.9907	43/G	27.332	153/A	0.0722037	Prom	✔
AT4G04930	DES-1-LIKE	4_2504668	0.00026	56	33.9907	43/G	27.332	153/A	0.0722037	-2465
AT4G04940	transducin family protein / WD-40 repeat family protein	4_2504668	0.00026	56	33.9907	43/G	27.332	153/A	0.0722037	6360
AT4G04601	unknown protein	4_2309515	0.00026	57	37.8389	18/T	27.8943	175/C	0.0724815	Exon	✔
AT4G04260	Bromo-adjacent homology (BAH) domain-containing protein	4_2051115	0.00026	58	24.8241	54/A	30.5231	134/G	0.0742899	-1521	✔
AT3G05220	Heavy metal transport/detoxification superfamily protein	3_1499076	0.00026	59	21.1545	22/G	29.7586	174/A	0.0721277	7756
AT3G05230	Signal peptidase subunit	3_1499076	0.00026	59	21.1545	22/G	29.7586	174/A	0.0721277	5457
AT3G05240	mitochondrial editing factor 19 (MEF19)	3_1499076	0.00026	59	21.1545	22/G	29.7586	174/A	0.0721277	-1695
AT3G05250	RING/U-box superfamily protein	3_1499076	0.00026	59	21.1545	22/G	29.7586	174/A	0.0721277	1607
AT3G05260	NAD(P)-binding Rossmann-fold superfamily protein	3_1499076	0.00026	59	21.1545	22/G	29.7586	174/A	0.0721277	Prom	✔
AT3G05270	Plant protein of unknown function (DUF869)	3_1499076	0.00026	59	21.1545	22/G	29.7586	174/A	0.0721277	1727
AT3G05280	Integral membrane Yip1 family protein	3_1499076	0.00026	59	21.1545	22/G	29.7586	174/A	0.0721277	4682
AT3G05290	peroxisomal adenine nucleotide carrier 1 (PNC1)	3_1499076	0.00026	59	21.1545	22/G	29.7586	174/A	0.0721277	6814
AT3G05300	Cytidine/deoxycytidylate deaminase family protein	3_1499076	0.00026	59	21.1545	22/G	29.7586	174/A	0.0721277	8948
AT3G05310	MIRO-related GTP-ase 3 (MIRO3)	3_1499076	0.00026	59	21.1545	22/G	29.7586	174/A	0.0721277	-9084
AT5G63610	cyclin-dependent kinase E;1 (CDKE;1)	5_25477146	0.00026	60	20.7235	17/C	29.656	175/G	0.0738737	-9249
AT5G63620	GroES-like zinc-binding alcohol dehydrogenase family protein	5_25477146	0.00026	60	20.7235	17/C	29.656	175/G	0.0738737	-6713
AT5G63630	P-loop containing nucleoside triphosphate hydrolases superfamily protein	5_25477146	0.00026	60	20.7235	17/C	29.656	175/G	0.0738737	Prom	✔
AT5G63630	P-loop containing nucleoside triphosphate hydrolases superfamily protein	5_25477146	0.00026	60	20.7235	17/C	29.656	175/G	0.0738737	Prom	✔
AT5G63640	ENTH/VHS/GAT family protein	5_25477146	0.00026	60	20.7235	17/C	29.656	175/G	0.0738737	Prom	✔
AT5G63650	SNF1-related protein kinase 2.5 (SNRK2.5)	5_25477146	0.00026	60	20.7235	17/C	29.656	175/G	0.0738737	4371
AT5G63660	PDF2.5	5_25477146	0.00026	60	20.7235	17/C	29.656	175/G	0.0738737	-6546
AT5G63670	SPT4 homolog 2 (SPT42)	5_25477146	0.00026	60	20.7235	17/C	29.656	175/G	0.0738737	-8781
AT4G04210	plant UBX domain containing protein 4 (PUX4)	4_2040041	0.00027	61	36.2727	22/G	27.8782	170/A	0.0731951	8188
AT4G04220	receptor like protein 46 (RLP46)	4_2040041	0.00027	61	36.2727	22/G	27.8782	170/A	0.0731951	4095	✔
AT4G14260	Protein of unknown function (DUF295)	4_8228126	0.00027	62	35.6722	36/A	27.245	160/C	0.0718309	-8555
AT4G14270	BEST Arabidopsis thaliana protein match is: dehydration-induced protein (ERD15) (TAIR:AT2G41430.5)	4_8228126	0.00027	62	35.6722	36/A	27.245	160/C	0.0718309	8804
AT4G14272	Defensin-like (DEFL) family protein	4_8228126	0.00027	62	35.6722	36/A	27.245	160/C	0.0718309	8100
AT4G14276	Defensin-like (DEFL) family protein	4_8228126	0.00027	62	35.6722	36/A	27.245	160/C	0.0718309	6933
AT4G14280	ARM repeat superfamily protein	4_8228126	0.00027	62	35.6722	36/A	27.245	160/C	0.0718309	2941
AT4G14290	alpha/beta-Hydrolases superfamily protein	4_8228126	0.00027	62	35.6722	36/A	27.245	160/C	0.0718309	Intron	✔
AT4G14300	RNA-binding (RRM/RBD/RNP motifs) family protein	4_8228126	0.00027	62	35.6722	36/A	27.245	160/C	0.0718309	-891
AT4G14301	unknown protein	4_8228126	0.00027	62	35.6722	36/A	27.245	160/C	0.0718309	5638
AT4G14305	Peroxisomal membrane 22 kDa (Mpv17/PMP22) family protein	4_8228126	0.00027	62	35.6722	36/A	27.245	160/C	0.0718309	6967
AT4G14310	Transducin/WD40 repeat-like superfamily protein	4_8228126	0.00027	62	35.6722	36/A	27.245	160/C	0.0718309	8633
AT5G44740	Y-family DNA polymerase H (POLH)	5_18062156	0.00027	63	24.044	50/T	30.4192	146/C	0.0717285	-8277
AT5G44750	REV1	5_18062156	0.00027	63	24.044	50/T	30.4192	146/C	0.0717285	1987
AT5G44760	C2 domain-containing protein	5_18062156	0.00027	63	24.044	50/T	30.4192	146/C	0.0717285	Exon	✔
AT5G44770	Cysteine/Histidine-rich C1 domain family protein	5_18062156	0.00027	63	24.044	50/T	30.4192	146/C	0.0717285	-899
AT5G44780	unknown protein	5_18062156	0.00027	63	24.044	50/T	30.4192	146/C	0.0717285	-3904
AT5G44785	organellar single-stranded DNA binding protein 3 (OSB3)	5_18062156	0.00027	63	24.044	50/T	30.4192	146/C	0.0717285	8525
AT1G66880	Protein kinase superfamily protein	1_24959917	0.00027	64	25.2841	82/A	31.3167	114/G	0.0716412	4306
AT1G66890	50S ribosomal-like protein	1_24959917	0.00027	64	25.2841	82/A	31.3167	114/G	0.0716412	1803
AT1G66900	alpha/beta-Hydrolases superfamily protein	1_24959917	0.00027	64	25.2841	82/A	31.3167	114/G	0.0716412	Intron	✔
AT1G66910	Protein kinase superfamily protein	1_24959917	0.00027	64	25.2841	82/A	31.3167	114/G	0.0716412	1717
AT1G66920	Protein kinase superfamily protein	1_24959917	0.00027	64	25.2841	82/A	31.3167	114/G	0.0716412	5387
AT1G66930	Protein kinase superfamily protein	1_24959917	0.00027	64	25.2841	82/A	31.3167	114/G	0.0716412	-8606
AT5G24000	Protein of unknown function (DUF819)	5_8122929	0.00029	67	32.8127	55/A	27.2248	141/G	0.0708739	-8219
AT5G24010	Protein kinase superfamily protein	5_8122929	0.00029	67	32.8127	55/A	27.2248	141/G	0.0708739	6314
AT5G24020	MIND	5_8122929	0.00029	67	32.8127	55/A	27.2248	141/G	0.0708739	4899
AT5G24030	SLAC1 homologue 3 (SLAH3)	5_8122929	0.00029	67	32.8127	55/A	27.2248	141/G	0.0708739	Prom	✔
AT5G24040	Protein of unknown function (DUF295)	5_8122929	0.00029	67	32.8127	55/A	27.2248	141/G	0.0708739	3083	✔
AT5G24050	FUNCTIONS IN: DNA binding	5_8122929	0.00029	67	32.8127	55/A	27.2248	141/G	0.0708739	5424
AT5G24060	Pentatricopeptide repeat (PPR) superfamily protein	5_8122929	0.00029	67	32.8127	55/A	27.2248	141/G	0.0708739	7050
AT4G10820	F-box family protein	4_6658400	0.0003	68	25.3552	96/C	32.093	100/T	0.0708672	-7491
AT4G10840	Tetratricopeptide repeat (TPR)-like superfamily protein	4_6658400	0.0003	68	25.3552	96/C	32.093	100/T	0.0708672	Intron	✔
AT4G10845	unknown protein	4_6658400	0.0003	68	25.3552	96/C	32.093	100/T	0.0708672	-2195
AT3G05410	Photosystem II reaction center PsbP family protein	3_1566327	0.00031	70	22.7409	22/G	29.558	174/C	0.070521	4792
AT3G05420	acyl-CoA binding protein 4 (ACBP4)	3_1566327	0.00031	70	22.7409	22/G	29.558	174/C	0.070521	Exon	✔
AT3G05425	unknown protein	3_1566327	0.00031	70	22.7409	22/G	29.558	174/C	0.070521	Prom	✔
AT3G05430	Tudor/PWWP/MBT superfamily protein	3_1566327	0.00031	70	22.7409	22/G	29.558	174/C	0.070521	Prom	✔
AT3G05440	C2 domain-containing protein	3_1566327	0.00031	70	22.7409	22/G	29.558	174/C	0.070521	-4391
AT3G05450	CONTAINS InterPro DOMAIN/s: Cystatin-related	3_1566327	0.00031	70	22.7409	22/G	29.558	174/C	0.070521	7582
AT3G05460	sporozoite surface protein-related	3_1566327	0.00031	70	22.7409	22/G	29.558	174/C	0.070521	-9473
AT4G10810	unknown protein	4_6657533	0.00031	71	25.3138	94/G	31.999	102/A	0.0702225	-9197
AT4G10820	F-box family protein	4_6657533	0.00031	71	25.3138	94/G	31.999	102/A	0.0702225	-6624
AT4G10840	Tetratricopeptide repeat (TPR)-like superfamily protein	4_6657533	0.00031	71	25.3138	94/G	31.999	102/A	0.0702225	Exon	✔
AT4G10845	unknown protein	4_6657533	0.00031	71	25.3138	94/G	31.999	102/A	0.0702225	-3062
AT1G65240	Eukaryotic aspartyl protease family protein	1_24243312	0.00032	72	34.7447	38/G	27.3614	158/T	0.0699698	-7963
AT1G65250	Protein kinase superfamily protein	1_24243312	0.00032	72	34.7447	38/G	27.3614	158/T	0.0699698	7504
AT1G65260	plastid transcriptionally active 4 (PTAC4)	1_24243312	0.00032	72	34.7447	38/G	27.3614	158/T	0.0699698	2607
AT1G65270	ER membrane protein complex subunit-like protein	1_24243312	0.00032	72	34.7447	38/G	27.3614	158/T	0.0699698	Intron	✔
AT1G65280	DNAJ heat shock N-terminal domain-containing protein	1_24243312	0.00032	72	34.7447	38/G	27.3614	158/T	0.0699698	Prom	✔
AT1G65290	mitochondrial acyl carrier protein 2 (mtACP2)	1_24243312	0.00032	72	34.7447	38/G	27.3614	158/T	0.0699698	5516
AT1G65295	unknown protein	1_24243312	0.00032	72	34.7447	38/G	27.3614	158/T	0.0699698	-6199
AT1G65300	AGAMOUS-like 38 (AGL38)	1_24243312	0.00032	72	34.7447	38/G	27.3614	158/T	0.0699698	-9617
AT4G14000	Putative methyltransferase family protein	4_8101183	0.00033	73	32.4871	85/T	25.964	111/C	0.069605	8511
AT4G14010	ralf-like 32 (RALFL32)	4_8101183	0.00033	73	32.4871	85/T	25.964	111/C	0.069605	-5801
AT4G14020	Rapid alkalinization factor (RALF) family protein	4_8101183	0.00033	73	32.4871	85/T	25.964	111/C	0.069605	-3447
AT4G14030	selenium-binding protein 1 (SBP1)	4_8101183	0.00033	73	32.4871	85/T	25.964	111/C	0.069605	Prom	✔
AT4G14040	selenium-binding protein 2 (SBP2)	4_8101183	0.00033	73	32.4871	85/T	25.964	111/C	0.069605	Exon	✔
AT4G14050	Pentatricopeptide repeat (PPR) superfamily protein	4_8101183	0.00033	73	32.4871	85/T	25.964	111/C	0.069605	2462
AT4G14060	Polyketide cyclase/dehydrase and lipid transport superfamily protein	4_8101183	0.00033	73	32.4871	85/T	25.964	111/C	0.069605	-4154
AT2G15470	Pectin lyase-like superfamily protein	2_6763977	0.00035	74	22.2571	28/C	29.8821	168/G	0.0691167	7926
AT2G15480	UDP-glucosyl transferase 73B5 (UGT73B5)	2_6763977	0.00035	74	22.2571	28/C	29.8821	168/G	0.0691167	476	✔
AT2G15490	UDP-glycosyltransferase 73B4 (UGT73B4)	2_6763977	0.00035	74	22.2571	28/C	29.8821	168/G	0.0691167	477	✔
AT2G15500	RNA-binding protein	2_6763977	0.00035	74	22.2571	28/C	29.8821	168/G	0.0691167	Exon	✔
AT2G15530	RING/U-box superfamily protein	2_6763977	0.00035	74	22.2571	28/C	29.8821	168/G	0.0691167	-6912
AT3G05880	RARE-COLD-INDUCIBLE 2A (RCI2A)	3_1768079	0.00035	76	22.9053	19/T	29.4249	177/C	0.0690045	-9539
AT3G05890	RARE-COLD-INDUCIBLE 2B (RCI2B)	3_1768079	0.00035	76	22.9053	19/T	29.4249	177/C	0.0690045	-7587
AT3G05900	neurofilament protein-related	3_1768079	0.00035	76	22.9053	19/T	29.4249	177/C	0.0690045	-2095
AT3G05910	Pectinacetylesterase family protein	3_1768079	0.00035	76	22.9053	19/T	29.4249	177/C	0.0690045	Prom	✔
AT3G05920	Heavy metal transport/detoxification superfamily protein	3_1768079	0.00035	76	22.9053	19/T	29.4249	177/C	0.0690045	711	✔
AT3G05930	germin-like protein 8 (GLP8)	3_1768079	0.00035	76	22.9053	19/T	29.4249	177/C	0.0690045	-258	✔
AT3G05935	unknown protein	3_1768079	0.00035	76	22.9053	19/T	29.4249	177/C	0.0690045	3883	✔
AT3G05936	unknown protein	3_1768079	0.00035	76	22.9053	19/T	29.4249	177/C	0.0690045	5753	✔
AT3G05937	unknown protein	3_1768079	0.00035	76	22.9053	19/T	29.4249	177/C	0.0690045	7823	✔
AT3G05940	Protein of unknown function (DUF300)	3_1768079	0.00035	76	22.9053	19/T	29.4249	177/C	0.0690045	9285	✔
AT3G05900	neurofilament protein-related	3_1771535	0.00035	77	22.9053	19/C	29.4249	177/T	0.0690045	-5551
AT3G05910	Pectinacetylesterase family protein	3_1771535	0.00035	77	22.9053	19/C	29.4249	177/T	0.0690045	-1915	✔
AT3G05920	Heavy metal transport/detoxification superfamily protein	3_1771535	0.00035	77	22.9053	19/C	29.4249	177/T	0.0690045	Prom	✔
AT3G05930	germin-like protein 8 (GLP8)	3_1771535	0.00035	77	22.9053	19/C	29.4249	177/T	0.0690045	126	✔
AT3G05935	unknown protein	3_1771535	0.00035	77	22.9053	19/C	29.4249	177/T	0.0690045	427	✔
AT3G05936	unknown protein	3_1771535	0.00035	77	22.9053	19/C	29.4249	177/T	0.0690045	2297	✔
AT3G05937	unknown protein	3_1771535	0.00035	77	22.9053	19/C	29.4249	177/T	0.0690045	4367	✔
AT3G05940	Protein of unknown function (DUF300)	3_1771535	0.00035	77	22.9053	19/C	29.4249	177/T	0.0690045	5829	✔
AT3G05950	RmlC-like cupins superfamily protein	3_1771535	0.00035	77	22.9053	19/C	29.4249	177/T	0.0690045	9532
AT5G62120	response regulator 23 (RR23)	5_24959548	0.00035	78	40.1647	17/G	27.7128	179/C	0.0689345	-9323
AT5G62130	Per1-like family protein	5_24959548	0.00035	78	40.1647	17/G	27.7128	179/C	0.0689345	-4316
AT5G62140	unknown protein	5_24959548	0.00035	78	40.1647	17/G	27.7128	179/C	0.0689345	-2163
AT5G62150	peptidoglycan-binding LysM domain-containing protein	5_24959548	0.00035	78	40.1647	17/G	27.7128	179/C	0.0689345	779
AT5G62160	zinc transporter 12 precursor (ZIP12)	5_24959548	0.00035	78	40.1647	17/G	27.7128	179/C	0.0689345	Prom	✔
AT5G62162	MIR399C	5_24959548	0.00035	78	40.1647	17/G	27.7128	179/C	0.0689345	-937
AT5G62165	AGAMOUS-like 42 (AGL42)	5_24959548	0.00035	78	40.1647	17/G	27.7128	179/C	0.0689345	-3152
AT2G34660	multidrug resistance-associated protein 2 (MRP2)	2_14610407	0.00037	79	33.6939	49/T	27.1592	147/G	0.068396	Intron	✔
AT2G34670	Protein of unknown function (DUF630 and DUF632)	2_14610407	0.00037	79	33.6939	49/T	27.1592	147/G	0.068396	2174	✔
AT2G34680	AUXIN-INDUCED IN ROOT CULTURES 9 (AIR9)	2_14610407	0.00037	79	33.6939	49/T	27.1592	147/G	0.068396	6215
AT4G06534	transmembrane protein	4_3355983	0.00038	80	34.7375	32/A	27.6238	160/G	0.0685627	Prom	✔
AT4G06536	SPla/RYanodine receptor (SPRY) domain-containing protein	4_3355983	0.00038	80	34.7375	32/A	27.6238	160/G	0.0685627	-2763
AT1G32130	Transcription elongation factor (TFIIS) family protein	1_11568904	0.00038	81	23.0882	34/C	29.9901	162/G	0.0682331	-4984
AT1G32140	F-box family protein	1_11568904	0.00038	81	23.0882	34/C	29.9901	162/G	0.0682331	-2071
AT1G32150	basic region/leucine zipper transcription factor 68 (bZIP68)	1_11568904	0.00038	81	23.0882	34/C	29.9901	162/G	0.0682331	373	✔
AT1G32160	Protein of unknown function (DUF760)	1_11568904	0.00038	81	23.0882	34/C	29.9901	162/G	0.0682331	Intron	✔
AT1G32170	xyloglucan endotransglucosylase/hydrolase 30 (XTH30)	1_11568904	0.00038	81	23.0882	34/C	29.9901	162/G	0.0682331	-4416
AT5G47040	lon protease 2 (LON2)	5_19106920	0.00038	82	32.9014	72/A	26.4073	124/T	0.0682158	-6205
AT5G47050	SBP (S-ribonuclease binding protein) family protein	5_19106920	0.00038	82	32.9014	72/A	26.4073	124/T	0.0682158	Exon	✔
AT5G47060	Protein of unknown function (DUF581)	5_19106920	0.00038	82	32.9014	72/A	26.4073	124/T	0.0682158	-7868
AT3G03200	NAC domain containing protein 45 (NAC045)	3_747079	0.00038	83	25.106	67/G	30.7078	129/A	0.0681449	-6552
AT3G03210	unknown protein	3_747079	0.00038	83	25.106	67/G	30.7078	129/A	0.0681449	4770
AT3G03220	expansin A13 (EXPA13)	3_747079	0.00038	83	25.106	67/G	30.7078	129/A	0.0681449	-1032	✔
AT3G03230	alpha/beta-Hydrolases superfamily protein	3_747079	0.00038	83	25.106	67/G	30.7078	129/A	0.0681449	Prom	✔
AT3G03240	alpha/beta-Hydrolases superfamily protein	3_747079	0.00038	83	25.106	67/G	30.7078	129/A	0.0681449	Intron	✔
AT3G03250	UDP-GLUCOSE PYROPHOSPHORYLASE 1 (UGP1)	3_747079	0.00038	83	25.106	67/G	30.7078	129/A	0.0681449	2311	✔
AT3G03260	homeodomain GLABROUS 8 (HDG8)	3_747079	0.00038	83	25.106	67/G	30.7078	129/A	0.0681449	8080
AT1G75460	ATP-dependent protease La (LON) domain protein	1_28331126	0.00039	84	40.9765	17/T	27.6358	179/C	0.0680099	1362	✔
AT1G75470	purine permease 15 (PUP15)	1_28331126	0.00039	84	40.9765	17/T	27.6358	179/C	0.0680099	Exon	✔
AT1G75490	Integrase-type DNA-binding superfamily protein	1_28331126	0.00039	84	40.9765	17/T	27.6358	179/C	0.0680099	-2376	✔
AT1G75500	Walls Are Thin 1 (WAT1)	1_28331126	0.00039	84	40.9765	17/T	27.6358	179/C	0.0680099	6600	✔
AT4G05490	RNI-like superfamily protein	4_2778766	0.00039	85	37.7063	16/A	28.0006	180/C	0.0678268	-4514
AT4G05494	unknown protein	4_2778766	0.00039	85	37.7063	16/A	28.0006	180/C	0.0678268	-401
AT4G05497	RNI-like superfamily protein	4_2778766	0.00039	85	37.7063	16/A	28.0006	180/C	0.0678268	Exon	✔
AT1G08410	P-loop containing nucleoside triphosphate hydrolases superfamily protein	1_2658865	0.0004	86	43.5833	12/T	27.8283	184/A	0.0677879	9486
AT1G08420	BRI1 suppressor 1 (BSU1)-like 2 (BSL2)	1_2658865	0.0004	86	43.5833	12/T	27.8283	184/A	0.0677879	1745	✔
AT1G08430	aluminum-activated malate transporter 1 (ALMT1)	1_2658865	0.0004	86	43.5833	12/T	27.8283	184/A	0.0677879	Exon	✔
AT1G08440	Aluminium activated malate transporter family protein	1_2658865	0.0004	86	43.5833	12/T	27.8283	184/A	0.0677879	-2162
AT1G08450	calreticulin 3 (CRT3)	1_2658865	0.0004	86	43.5833	12/T	27.8283	184/A	0.0677879	8933
AT3G13820	F-box and associated interaction domains-containing protein	3_4559978	0.0004	87	23.4138	29/A	29.7269	167/C	0.0677746	9115
AT3G13830	F-box and associated interaction domains-containing protein	3_4559978	0.0004	87	23.4138	29/A	29.7269	167/C	0.0677746	4902
AT3G13840	GRAS family transcription factor	3_4559978	0.0004	87	23.4138	29/A	29.7269	167/C	0.0677746	-1141
AT3G13845	unknown protein	3_4559978	0.0004	87	23.4138	29/A	29.7269	167/C	0.0677746	Prom	✔
AT3G13850	LOB domain-containing protein 22 (LBD22)	3_4559978	0.0004	87	23.4138	29/A	29.7269	167/C	0.0677746	Exon	✔
AT3G13857	unknown protein	3_4559978	0.0004	87	23.4138	29/A	29.7269	167/C	0.0677746	Prom	✔
AT3G13860	heat shock protein 60-3A (HSP60-3A)	3_4559978	0.0004	87	23.4138	29/A	29.7269	167/C	0.0677746	1539
AT3G13870	ROOT HAIR DEFECTIVE 3 (RHD3)	3_4559978	0.0004	87	23.4138	29/A	29.7269	167/C	0.0677746	5434
AT5G42146	unknown protein	5_16854576	0.00041	88	44.6538	13/A	27.7313	182/G	0.067721	9607
AT5G42150	Glutathione S-transferase family protein	5_16854576	0.00041	88	44.6538	13/A	27.7313	182/G	0.067721	6297
AT5G42170	SGNH hydrolase-type esterase superfamily protein	5_16854576	0.00041	88	44.6538	13/A	27.7313	182/G	0.067721	2869
AT5G42180	Peroxidase superfamily protein	5_16854576	0.00041	88	44.6538	13/A	27.7313	182/G	0.067721	352
AT5G42190	E3 ubiquitin ligase SCF complex subunit SKP1/ASK1 family protein	5_16854576	0.00041	88	44.6538	13/A	27.7313	182/G	0.067721	Exon	✔
AT5G42200	RING/U-box superfamily protein	5_16854576	0.00041	88	44.6538	13/A	27.7313	182/G	0.067721	-3891
AT5G42203	unknown protein	5_16854576	0.00041	88	44.6538	13/A	27.7313	182/G	0.067721	-6544
AT5G42210	Major facilitator superfamily protein	5_16854576	0.00041	88	44.6538	13/A	27.7313	182/G	0.067721	-9464
AT3G57170	N-acetylglucosaminyl transferase component family protein / Gpi1 family protein	3_21172099	0.00041	89	45.2727	11/T	27.813	185/C	0.0674296	-6915
AT3G57180	BRASSINAZOLE(BRZ) INSENSITIVE PALE GREEN 2 (BPG2)	3_21172099	0.00041	89	45.2727	11/T	27.813	185/C	0.0674296	-3961
AT3G57190	peptide chain release factor	3_21172099	0.00041	89	45.2727	11/T	27.813	185/C	0.0674296	3723
AT3G57200	glycosyltransferase-like protein	3_21172099	0.00041	89	45.2727	11/T	27.813	185/C	0.0674296	Exon	✔
AT3G57210	Protein of unknown function (DUF626)	3_21172099	0.00041	89	45.2727	11/T	27.813	185/C	0.0674296	728	✔
AT3G57220	Glycosyl transferase family 4 protein	3_21172099	0.00041	89	45.2727	11/T	27.813	185/C	0.0674296	-356	✔
AT3G57230	AGAMOUS-like 16 (AGL16)	3_21172099	0.00041	89	45.2727	11/T	27.813	185/C	0.0674296	-3324
AT3G57240	β-1,3-GLUCANASE 3 (BG3)	3_21172099	0.00041	89	45.2727	11/T	27.813	185/C	0.0674296	9643
AT3G03220	expansin A13 (EXPA13)	3_755869	0.00041	90	24.5289	38/T	29.8184	158/A	0.0673742	-9822
AT3G03230	alpha/beta-Hydrolases superfamily protein	3_755869	0.00041	90	24.5289	38/T	29.8184	158/A	0.0673742	-7860
AT3G03240	alpha/beta-Hydrolases superfamily protein	3_755869	0.00041	90	24.5289	38/T	29.8184	158/A	0.0673742	-5269
AT3G03250	UDP-GLUCOSE PYROPHOSPHORYLASE 1 (UGP1)	3_755869	0.00041	90	24.5289	38/T	29.8184	158/A	0.0673742	Prom	✔
AT3G03260	homeodomain GLABROUS 8 (HDG8)	3_755869	0.00041	90	24.5289	38/T	29.8184	158/A	0.0673742	Exon	✔
AT3G03270	Adenine nucleotide alpha hydrolases-like superfamily protein	3_755869	0.00041	90	24.5289	38/T	29.8184	158/A	0.0673742	5441
AT3G03272	unknown function	3_755869	0.00041	90	24.5289	38/T	29.8184	158/A	0.0673742	7788
AT3G03280	unknown protein	3_755869	0.00041	90	24.5289	38/T	29.8184	158/A	0.0673742	-7590
AT3G03290	Adenine nucleotide alpha hydrolases-like superfamily protein	3_755869	0.00041	90	24.5289	38/T	29.8184	158/A	0.0673742	-8876
AT2G16970	maternal effect embryo arrest 15 (MEE15)	2_7380307	0.00042	91	31.6717	46/T	27.9463	149/C	0.06735	4779
AT2G16980	Major facilitator superfamily protein	2_7380307	0.00042	91	31.6717	46/T	27.9463	149/C	0.06735	Intron	✔
AT2G16990	Major facilitator superfamily protein	2_7380307	0.00042	91	31.6717	46/T	27.9463	149/C	0.06735	-728
AT2G17000	Mechanosensitive ion channel family protein	2_7380307	0.00042	91	31.6717	46/T	27.9463	149/C	0.06735	8586
AT2G14206	unknown protein	2_6011547	0.00042	92	41.55	12/C	28.0829	181/T	0.0677722	-3168	✔
AT2G14210	AGAMOUS-like 44 (AGL44)	2_6011547	0.00042	92	41.55	12/C	28.0829	181/T	0.0677722	-5011
AT5G19560	ROP uanine nucleotide exchange factor 10 (ROPGEF10)	5_6613428	0.00044	94	33.2117	60/C	26.8434	136/G	0.0666585	6980
AT5G19570	unknown protein	5_6613428	0.00044	94	33.2117	60/C	26.8434	136/G	0.0666585	6225
AT5G19580	glyoxal oxidase-related protein	5_6613428	0.00044	94	33.2117	60/C	26.8434	136/G	0.0666585	-1802
AT5G19590	unknown function	5_6613428	0.00044	94	33.2117	60/C	26.8434	136/G	0.0666585	Prom	✔
AT5G19600	sulfate transporter 3;5 (SULTR3;5)	5_6613428	0.00044	94	33.2117	60/C	26.8434	136/G	0.0666585	Intron	✔
AT5G19610	GNOM-like 2 (GNL2)	5_6613428	0.00044	94	33.2117	60/C	26.8434	136/G	0.0666585	4318
AT5G19620	outer envelope protein of 80 kDa (OEP80)	5_6613428	0.00044	94	33.2117	60/C	26.8434	136/G	0.0666585	-7776
AT4G03550	glucan synthase-like 5 (GSL05)	4_1582817	0.00044	95	38.6842	19/T	27.7608	176/G	0.0667368	3121
AT4G03560	two-pore channel 1 (TPC1)	4_1582817	0.00044	95	38.6842	19/T	27.7608	176/G	0.0667368	Intron	✔
AT4G03565	Cystatin/monellin superfamily protein	4_1582817	0.00044	95	38.6842	19/T	27.7608	176/G	0.0667368	-1930	✔
AT4G03566	unknown protein	4_1582817	0.00044	95	38.6842	19/T	27.7608	176/G	0.0667368	5747	✔
AT4G03570	Cystatin/monellin superfamily protein	4_1582817	0.00044	95	38.6842	19/T	27.7608	176/G	0.0667368	7596	✔
AT5G65980	Auxin efflux carrier family protein	5_26403264	0.00045	96	23.4731	67/C	31.5558	129/T	0.0664609	9032
AT5G65990	Transmembrane amino acid transporter family protein	5_26403264	0.00045	96	23.4731	67/C	31.5558	129/T	0.0664609	6751
AT5G66000	unknown protein	5_26403264	0.00045	96	23.4731	67/C	31.5558	129/T	0.0664609	-3764
AT5G66005	Expressed protein	5_26403264	0.00045	96	23.4731	67/C	31.5558	129/T	0.0664609	-1990
AT5G66010	RNA-binding (RRM/RBD/RNP motifs) family protein	5_26403264	0.00045	96	23.4731	67/C	31.5558	129/T	0.0664609	2265
AT5G66020	SUPPRESSOR OF ACTIN 1B (ATSAC1B)	5_26403264	0.00045	96	23.4731	67/C	31.5558	129/T	0.0664609	Exon	✔
AT5G66030	ATGRIP	5_26403264	0.00045	96	23.4731	67/C	31.5558	129/T	0.0664609	1630
AT5G66040	sulfurtransferase protein 16 (STR16)	5_26403264	0.00045	96	23.4731	67/C	31.5558	129/T	0.0664609	-5256
AT5G66045	MIR170	5_26403264	0.00045	96	23.4731	67/C	31.5558	129/T	0.0664609	8330
AT5G66050	Wound-responsive family protein	5_26403264	0.00045	96	23.4731	67/C	31.5558	129/T	0.0664609	8824
AT1G37140	MEI2 C-terminal RRM only like 1 (MCT1)	1_14174203	0.00046	97	38.0522	23/G	27.5618	173/T	0.0662086	-162	✔
AT1G37150	holocarboxylase synthetase 2 (HCS2)	1_14174203	0.00046	97	38.0522	23/G	27.5618	173/T	0.0662086	778
AT4G04180	P-loop containing nucleoside triphosphate hydrolases superfamily protein	4_2019922	0.00047	99	39.1462	13/A	28.1022	182/G	0.0662022	Prom	✔
AT4G04190	unknown protein	4_2019922	0.00047	99	39.1462	13/A	28.1022	182/G	0.0662022	-2656
AT4G04200	Microsomal signal peptidase 25 kDa subunit (SPC25)	4_2019922	0.00047	99	39.1462	13/A	28.1022	182/G	0.0662022	-5243
AT4G04210	plant UBX domain containing protein 4 (PUX4)	4_2019922	0.00047	99	39.1462	13/A	28.1022	182/G	0.0662022	-8397
AT3G03230	alpha/beta-Hydrolases superfamily protein	3_757354	0.00047	100	25.6559	68/C	30.4594	128/G	0.0659848	-9345
AT3G03240	alpha/beta-Hydrolases superfamily protein	3_757354	0.00047	100	25.6559	68/C	30.4594	128/G	0.0659848	-6754	✔
AT3G03250	UDP-GLUCOSE PYROPHOSPHORYLASE 1 (UGP1)	3_757354	0.00047	100	25.6559	68/C	30.4594	128/G	0.0659848	-1195	✔
AT3G03260	homeodomain GLABROUS 8 (HDG8)	3_757354	0.00047	100	25.6559	68/C	30.4594	128/G	0.0659848	Exon	✔
AT3G03270	Adenine nucleotide alpha hydrolases-like superfamily protein	3_757354	0.00047	100	25.6559	68/C	30.4594	128/G	0.0659848	3956
AT3G03272	unknown function	3_757354	0.00047	100	25.6559	68/C	30.4594	128/G	0.0659848	6303
AT3G03280	unknown protein	3_757354	0.00047	100	25.6559	68/C	30.4594	128/G	0.0659848	-6105
AT3G03290	Adenine nucleotide alpha hydrolases-like superfamily protein	3_757354	0.00047	100	25.6559	68/C	30.4594	128/G	0.0659848	-7391
AT3G05770	unknown protein	3_1720592	0.00048	101	23.14	20/G	29.4352	176/A	0.0658696	-6427
AT3G05780	lon protease 3 (LON3)	3_1720592	0.00048	101	23.14	20/G	29.4352	176/A	0.0658696	Prom	✔
AT3G05790	lon protease 4 (LON4)	3_1720592	0.00048	101	23.14	20/G	29.4352	176/A	0.0658696	Exon	✔
AT3G05800	AtBS1(activation-tagged BRI1 suppressor 1)-interacting factor 1 (AIF1)	3_1720592	0.00048	101	23.14	20/G	29.4352	176/A	0.0658696	-4714	✔
AT3G24490	Alcohol dehydrogenase transcription factor Myb/SANT-like family protein	3_8918322	0.00048	102	37.7241	29/T	27.2419	167/A	0.0657785	6126
AT3G24495	MUTS homolog 7 (MSH7)	3_8918322	0.00048	102	37.7241	29/T	27.2419	167/A	0.0657785	Prom	✔
AT3G24500	multiprotein bridging factor 1C (MBF1C)	3_8918322	0.00048	102	37.7241	29/T	27.2419	167/A	0.0657785	Prom	✔
AT3G24503	aldehyde dehydrogenase 2C4 (ALDH2C4)	3_8918322	0.00048	102	37.7241	29/T	27.2419	167/A	0.0657785	1238	✔
AT3G24506	unknown protein	3_8918322	0.00048	102	37.7241	29/T	27.2419	167/A	0.0657785	9847
AT3G24508	Defensin-like (DEFL) family protein	3_8918322	0.00048	102	37.7241	29/T	27.2419	167/A	0.0657785	-9834
AT2G02680	Cysteine/Histidine-rich C1 domain family protein	2_754940	0.00048	103	25.8191	94/G	31.5677	96/C	0.0690362	6367
AT2G02690	Cysteine/Histidine-rich C1 domain family protein	2_754940	0.00048	103	25.8191	94/G	31.5677	96/C	0.0690362	3040	✔
AT2G02700	Cysteine/Histidine-rich C1 domain family protein	2_754940	0.00048	103	25.8191	94/G	31.5677	96/C	0.0690362	Prom	✔
AT2G02710	PAS/LOV protein B (PLPB)	2_754940	0.00048	103	25.8191	94/G	31.5677	96/C	0.0690362	3753
AT2G02720	Pectate lyase family protein	2_754940	0.00048	103	25.8191	94/G	31.5677	96/C	0.0690362	-6071
AT2G02730	Protein of unknown function (DUF1664)	2_754940	0.00048	103	25.8191	94/G	31.5677	96/C	0.0690362	9607
AT3G03230	alpha/beta-Hydrolases superfamily protein	3_757422	0.00048	104	25.5746	67/A	30.4643	129/G	0.0657179	-9413
AT3G03240	alpha/beta-Hydrolases superfamily protein	3_757422	0.00048	104	25.5746	67/A	30.4643	129/G	0.0657179	-6822	✔
AT3G03250	UDP-GLUCOSE PYROPHOSPHORYLASE 1 (UGP1)	3_757422	0.00048	104	25.5746	67/A	30.4643	129/G	0.0657179	-1263	✔
AT3G03260	homeodomain GLABROUS 8 (HDG8)	3_757422	0.00048	104	25.5746	67/A	30.4643	129/G	0.0657179	Exon	✔
AT3G03270	Adenine nucleotide alpha hydrolases-like superfamily protein	3_757422	0.00048	104	25.5746	67/A	30.4643	129/G	0.0657179	3888
AT3G03272	unknown function	3_757422	0.00048	104	25.5746	67/A	30.4643	129/G	0.0657179	6235
AT3G03280	unknown protein	3_757422	0.00048	104	25.5746	67/A	30.4643	129/G	0.0657179	-6037
AT3G03290	Adenine nucleotide alpha hydrolases-like superfamily protein	3_757422	0.00048	104	25.5746	67/A	30.4643	129/G	0.0657179	-7323
AT4G06676	CONTAINS InterPro DOMAIN/s: Etoposide-induced 2.4 (InterPro:IPR009890)	4_3901068	0.0005	106	34.825	28/A	27.7875	168/G	0.0654075	Exon	✔
AT4G06688	FUNCTIONS IN: molecular	4_3919372	0.0005	107	34.825	28/G	27.7875	168/T	0.0654075	Prom	✔
AT4G07380	unknown protein	4_4202873	0.0005	108	34.825	28/T	27.7875	168/C	0.0654075	-7857	✔
AT4G07390	Mannose-P-dolichol utilization defect 1 protein	4_4202873	0.0005	108	34.825	28/T	27.7875	168/C	0.0654075	5302	✔
AT4G07400	VIER F-box proteine 3 (VFB3)	4_4202873	0.0005	108	34.825	28/T	27.7875	168/C	0.0654075	-1362	✔
AT4G07408	unknown protein	4_4202873	0.0005	108	34.825	28/T	27.7875	168/C	0.0654075	1680	✔
AT4G07410	Transducin family protein / WD-40 repeat family protein	4_4202873	0.0005	108	34.825	28/T	27.7875	168/C	0.0654075	Exon	✔
AT1G30825	Arp2/3 complex_ 34 kD subunit p34-Arc	1_10965403	0.0005	109	20.2769	13/T	29.3978	183/G	0.0654019	2221	✔
AT1G30840	purine permease 4 (PUP4)	1_10965403	0.0005	109	20.2769	13/T	29.3978	183/G	0.0654019	-7042
AT4G25040	Uncharacterised protein family (UPF0497)	4_12878327	0.0005	110	31.5746	71/C	27.2128	125/A	0.0653289	8870
AT4G25050	acyl carrier protein 4 (ACP4)	4_12878327	0.0005	110	31.5746	71/C	27.2128	125/A	0.0653289	7011
AT4G25070	unknown protein	4_12878327	0.0005	110	31.5746	71/C	27.2128	125/A	0.0653289	1593
AT4G25080	magnesium-protoporphyrin IX methyltransferase (CHLM)	4_12878327	0.0005	110	31.5746	71/C	27.2128	125/A	0.0653289	Intron	✔
AT4G25090	Riboflavin synthase-like superfamily protein	4_12878327	0.0005	110	31.5746	71/C	27.2128	125/A	0.0653289	444	✔
AT4G25100	Fe superoxide dismutase 1 (FSD1)	4_12878327	0.0005	110	31.5746	71/C	27.2128	125/A	0.0653289	5973
AT4G25110	metacaspase 2 (MC2)	4_12878327	0.0005	110	31.5746	71/C	27.2128	125/A	0.0653289	9191
AT3G02370	unknown protein	3_494223	0.00051	111	25.85	82/A	30.9096	114/G	0.0651585	8609
AT3G02380	CONSTANS-like 2 (COL2)	3_494223	0.00051	111	25.85	82/A	30.9096	114/G	0.0651585	-3530
AT3G02390	unknown protein	3_494223	0.00051	111	25.85	82/A	30.9096	114/G	0.0651585	4749
AT3G02400	SMAD/FHA domain-containing protein	3_494223	0.00051	111	25.85	82/A	30.9096	114/G	0.0651585	2636
AT3G02410	Isoprenylcysteine methylesterase-like 2 (ICME-LIKE2)	3_494223	0.00051	111	25.85	82/A	30.9096	114/G	0.0651585	Intron	✔
AT3G02420	unknown protein	3_494223	0.00051	111	25.85	82/A	30.9096	114/G	0.0651585	1662	✔
AT3G02430	Protein of unknown function (DUF679)	3_494223	0.00051	111	25.85	82/A	30.9096	114/G	0.0651585	-3122
AT3G02440	TRICHOME BIREFRINGENCE-LIKE 20 (TBL20)	3_494223	0.00051	111	25.85	82/A	30.9096	114/G	0.0651585	6581
AT3G02450	cell division protein ftsH	3_494223	0.00051	111	25.85	82/A	30.9096	114/G	0.0651585	8484
AT3G02460	Ypt/Rab-GAP domain of gyp1p superfamily protein	3_494223	0.00051	111	25.85	82/A	30.9096	114/G	0.0651585	-9211
AT1G08060	MORPHEUS MOLECULE (MOM)	1_2513630	0.00051	112	44.7167	12/G	27.7409	176/T	0.0664777	-546	✔
AT1G08065	alpha carbonic anhydrase 5 (ACA5)	1_2513630	0.00051	112	44.7167	12/G	27.7409	176/T	0.0664777	Prom	✔
AT1G08070	ORGANELLE TRANSCRIPT PROCESSING 82 (OTP82)	1_2513630	0.00051	112	44.7167	12/G	27.7409	176/T	0.0664777	562	✔
AT1G08080	alpha carbonic anhydrase 7 (ACA7)	1_2513630	0.00051	112	44.7167	12/G	27.7409	176/T	0.0664777	3361
AT1G08090	nitrate transporter 2:1 (NRT2:1)	1_2513630	0.00051	112	44.7167	12/G	27.7409	176/T	0.0664777	-8446
AT3G24480	Leucine-rich repeat (LRR) family protein	3_8907821	0.00052	113	33.6053	57/T	26.8507	138/G	0.0651747	-3183
AT3G24490	Alcohol dehydrogenase transcription factor Myb/SANT-like family protein	3_8907821	0.00052	113	33.6053	57/T	26.8507	138/G	0.0651747	-949	✔
AT3G24495	MUTS homolog 7 (MSH7)	3_8907821	0.00052	113	33.6053	57/T	26.8507	138/G	0.0651747	4522
AT3G24500	multiprotein bridging factor 1C (MBF1C)	3_8907821	0.00052	113	33.6053	57/T	26.8507	138/G	0.0651747	-8858
AT5G03900	Iron-sulphur cluster biosynthesis family protein	5_1060162	0.00052	114	39.4	22/G	27.4517	174/T	0.0650201	7775
AT5G03905	Iron-sulphur cluster biosynthesis family protein	5_1060162	0.00052	114	39.4	22/G	27.4517	174/T	0.0650201	5888
AT5G03910	ABC2 homolog 12 (ATH12)	5_1060162	0.00052	114	39.4	22/G	27.4517	174/T	0.0650201	-990
AT5G03920	unknown protein	5_1060162	0.00052	114	39.4	22/G	27.4517	174/T	0.0650201	1393
AT5G03930	unknown protein	5_1060162	0.00052	114	39.4	22/G	27.4517	174/T	0.0650201	8	✔
AT5G03940	chloroplast signal recognition particle 54 kDa subunit (CPSRP54)	5_1060162	0.00052	114	39.4	22/G	27.4517	174/T	0.0650201	Exon	✔
AT5G03944	unknown protein	5_1060162	0.00052	114	39.4	22/G	27.4517	174/T	0.0650201	4449
AT5G03960	IQ-domain 12 (IQD12)	5_1060162	0.00052	114	39.4	22/G	27.4517	174/T	0.0650201	8098
AT4G05000	VPS28-2	4_2573620	0.00052	115	32.3658	76/T	26.53	120/C	0.0649857	8880
AT4G05010	F-box family protein	4_2573620	0.00052	115	32.3658	76/T	26.53	120/C	0.0649857	5458
AT4G05018	unknown protein	4_2573620	0.00052	115	32.3658	76/T	26.53	120/C	0.0649857	1443
AT4G05020	NAD(P)H dehydrogenase B2 (NDB2)	4_2573620	0.00052	115	32.3658	76/T	26.53	120/C	0.0649857	Exon	✔
AT4G05030	Copper transport protein family	4_2573620	0.00052	115	32.3658	76/T	26.53	120/C	0.0649857	3170
AT4G05040	ankyrin repeat family protein	4_2573620	0.00052	115	32.3658	76/T	26.53	120/C	0.0649857	-3026
AT5G53740	unknown protein	5_21824547	0.00053	119	32.1423	52/A	27.5833	144/C	0.0646669	9639
AT5G53750	CBS domain-containing protein	5_21824547	0.00053	119	32.1423	52/A	27.5833	144/C	0.0646669	5704
AT5G53760	MILDEW RESISTANCE LOCUS O 11 (MLO11)	5_21824547	0.00053	119	32.1423	52/A	27.5833	144/C	0.0646669	Intron	✔
AT5G53770	Nucleotidyltransferase family protein	5_21824547	0.00053	119	32.1423	52/A	27.5833	144/C	0.0646669	-109	✔
AT4G14260	Protein of unknown function (DUF295)	4_8226124	0.00054	120	34.6902	41/C	27.2329	155/T	0.064648	-6553
AT4G14270	BEST Arabidopsis thaliana protein match is: dehydration-induced protein (ERD15) (TAIR:AT2G41430.5)	4_8226124	0.00054	120	34.6902	41/C	27.2329	155/T	0.064648	6802
AT4G14272	Defensin-like (DEFL) family protein	4_8226124	0.00054	120	34.6902	41/C	27.2329	155/T	0.064648	6098
AT4G14276	Defensin-like (DEFL) family protein	4_8226124	0.00054	120	34.6902	41/C	27.2329	155/T	0.064648	4931
AT4G14280	ARM repeat superfamily protein	4_8226124	0.00054	120	34.6902	41/C	27.2329	155/T	0.064648	939
AT4G14290	alpha/beta-Hydrolases superfamily protein	4_8226124	0.00054	120	34.6902	41/C	27.2329	155/T	0.064648	Exon	✔
AT4G14300	RNA-binding (RRM/RBD/RNP motifs) family protein	4_8226124	0.00054	120	34.6902	41/C	27.2329	155/T	0.064648	-2893
AT4G14301	unknown protein	4_8226124	0.00054	120	34.6902	41/C	27.2329	155/T	0.064648	7640
AT4G14305	Peroxisomal membrane 22 kDa (Mpv17/PMP22) family protein	4_8226124	0.00054	120	34.6902	41/C	27.2329	155/T	0.064648	8969
AT4G13840	HXXXD-type acyl-transferase family protein	4_8025724	0.00054	121	42.0833	12/C	27.9261	184/A	0.0646114	-7238
AT4G13850	glycine-rich RNA-binding protein 2 (GR-RBP2)	4_8025724	0.00054	121	42.0833	12/C	27.9261	184/A	0.0646114	3464
AT4G13860	RNA-binding (RRM/RBD/RNP motifs) family protein	4_8025724	0.00054	121	42.0833	12/C	27.9261	184/A	0.0646114	2562
AT4G13870	Werner syndrome-like exonuclease (WRNEXO)	4_8025724	0.00054	121	42.0833	12/C	27.9261	184/A	0.0646114	Prom	✔
AT4G13880	receptor like protein 48 (RLP48)	4_8025724	0.00054	121	42.0833	12/C	27.9261	184/A	0.0646114	Prom	✔
AT4G13885	ribonuclease H-like superfamily protein	4_8025724	0.00054	121	42.0833	12/C	27.9261	184/A	0.0646114	3187
AT4G13890	EMBRYO SAC DEVELOPMENT ARREST 37 (EDA36)	4_8025724	0.00054	121	42.0833	12/C	27.9261	184/A	0.0646114	6248
AT4G08980	F-BOX WITH WD-40 2 (FBW2)	4_5769550	0.00054	122	33.8182	11/T	28.5341	182/C	0.06562	8992
AT4G08990	DNA (cytosine-5-)-methyltransferase family protein	4_5769550	0.00054	122	33.8182	11/T	28.5341	182/C	0.06562	Exon	✔
AT4G09000	general regulatory factor 1 (GRF1)	4_5769550	0.00054	122	33.8182	11/T	28.5341	182/C	0.06562	-3660
AT4G09010	ascorbate peroxidase 4 (APX4)	4_5769550	0.00054	122	33.8182	11/T	28.5341	182/C	0.06562	7847
AT5G03650	starch branching enzyme 2.2 (SBE2.2)	5_944993	0.00054	123	33.3349	63/A	26.6656	131/G	0.0647138	7352
AT5G03660	Family of unknown function (DUF662)	5_944993	0.00054	123	33.3349	63/A	26.6656	131/G	0.0647138	4935
AT5G03670	TON1 RECRUITING MOTIF 28 (TRM28)	5_944993	0.00054	123	33.3349	63/A	26.6656	131/G	0.0647138	-153	✔
AT1G30760	FAD-binding Berberine family protein	1_10925298	0.00054	124	21.1467	15/G	29.4265	181/A	0.0645355	4621
AT1G30780	F-box associated ubiquitination effector family protein	1_10925298	0.00054	124	21.1467	15/G	29.4265	181/A	0.0645355	Exon	✔
AT1G30790	F-box and associated interaction domains-containing protein	1_10925298	0.00054	124	21.1467	15/G	29.4265	181/A	0.0645355	-5415	✔
AT1G30795	Glycine-rich protein family	1_10925298	0.00054	124	21.1467	15/G	29.4265	181/A	0.0645355	-8455
AT1G30800	Fasciclin-like arabinogalactan family protein	1_10925298	0.00054	124	21.1467	15/G	29.4265	181/A	0.0645355	-9625
AT5G28850	Calcium-binding EF-hand family protein	5_10888781	0.00055	125	43.2923	13/A	27.7628	183/G	0.0643802	-5337	✔
AT5G28885	unknown protein	5_10888781	0.00055	125	43.2923	13/A	27.7628	183/G	0.0643802	-5960
AT3G03220	expansin A13 (EXPA13)	3_752881	0.00056	126	24.5194	36/T	29.7544	160/C	0.0642794	-6834
AT3G03230	alpha/beta-Hydrolases superfamily protein	3_752881	0.00056	126	24.5194	36/T	29.7544	160/C	0.0642794	-4872
AT3G03240	alpha/beta-Hydrolases superfamily protein	3_752881	0.00056	126	24.5194	36/T	29.7544	160/C	0.0642794	-2281
AT3G03250	UDP-GLUCOSE PYROPHOSPHORYLASE 1 (UGP1)	3_752881	0.00056	126	24.5194	36/T	29.7544	160/C	0.0642794	Intron	✔
AT3G03260	homeodomain GLABROUS 8 (HDG8)	3_752881	0.00056	126	24.5194	36/T	29.7544	160/C	0.0642794	2278	✔
AT3G03270	Adenine nucleotide alpha hydrolases-like superfamily protein	3_752881	0.00056	126	24.5194	36/T	29.7544	160/C	0.0642794	8429
AT4G04180	P-loop containing nucleoside triphosphate hydrolases superfamily protein	4_2027453	0.00056	127	24.5957	23/T	29.3509	173/G	0.0642542	3461
AT4G04190	unknown protein	4_2027453	0.00056	127	24.5957	23/T	29.3509	173/G	0.0642542	993
AT4G04200	Microsomal signal peptidase 25 kDa subunit (SPC25)	4_2027453	0.00056	127	24.5957	23/T	29.3509	173/G	0.0642542	Intron	✔
AT4G04210	plant UBX domain containing protein 4 (PUX4)	4_2027453	0.00056	127	24.5957	23/T	29.3509	173/G	0.0642542	-866	✔
AT4G04220	receptor like protein 46 (RLP46)	4_2027453	0.00056	127	24.5957	23/T	29.3509	173/G	0.0642542	-3974	✔
AT4G03550	glucan synthase-like 5 (GSL05)	4_1585524	0.00057	128	36.3781	32/G	27.3128	164/A	0.0640563	5828
AT4G03560	two-pore channel 1 (TPC1)	4_1585524	0.00057	128	36.3781	32/G	27.3128	164/A	0.0640563	Intron	✔
AT4G03565	Cystatin/monellin superfamily protein	4_1585524	0.00057	128	36.3781	32/G	27.3128	164/A	0.0640563	Prom	✔
AT4G03566	unknown protein	4_1585524	0.00057	128	36.3781	32/G	27.3128	164/A	0.0640563	3040
AT4G03570	Cystatin/monellin superfamily protein	4_1585524	0.00057	128	36.3781	32/G	27.3128	164/A	0.0640563	4889
AT4G03580	BEST Arabidopsis thaliana protein match is: Cysteine proteinases superfamily protein (TAIR:AT5G17080.1)	4_1585524	0.00057	128	36.3781	32/G	27.3128	164/A	0.0640563	-9461
AT4G03550	glucan synthase-like 5 (GSL05)	4_1586147	0.00057	129	36.6655	29/T	27.5683	164/G	0.0649233	6451
AT4G03560	two-pore channel 1 (TPC1)	4_1586147	0.00057	129	36.6655	29/T	27.5683	164/G	0.0649233	181	✔
AT4G03565	Cystatin/monellin superfamily protein	4_1586147	0.00057	129	36.6655	29/T	27.5683	164/G	0.0649233	Prom	✔
AT4G03566	unknown protein	4_1586147	0.00057	129	36.6655	29/T	27.5683	164/G	0.0649233	2417
AT4G03570	Cystatin/monellin superfamily protein	4_1586147	0.00057	129	36.6655	29/T	27.5683	164/G	0.0649233	4266
AT4G03580	BEST Arabidopsis thaliana protein match is: Cysteine proteinases superfamily protein (TAIR:AT5G17080.1)	4_1586147	0.00057	129	36.6655	29/T	27.5683	164/G	0.0649233	-8838
AT3G05880	RARE-COLD-INDUCIBLE 2A (RCI2A)	3_1767960	0.00058	131	23.6636	22/T	29.4815	173/C	0.0639215	-9420
AT3G05890	RARE-COLD-INDUCIBLE 2B (RCI2B)	3_1767960	0.00058	131	23.6636	22/T	29.4815	173/C	0.0639215	-7468
AT3G05900	neurofilament protein-related	3_1767960	0.00058	131	23.6636	22/T	29.4815	173/C	0.0639215	-1976
AT3G05910	Pectinacetylesterase family protein	3_1767960	0.00058	131	23.6636	22/T	29.4815	173/C	0.0639215	Prom	✔
AT3G05920	Heavy metal transport/detoxification superfamily protein	3_1767960	0.00058	131	23.6636	22/T	29.4815	173/C	0.0639215	830	✔
AT3G05930	germin-like protein 8 (GLP8)	3_1767960	0.00058	131	23.6636	22/T	29.4815	173/C	0.0639215	-377	✔
AT3G05935	unknown protein	3_1767960	0.00058	131	23.6636	22/T	29.4815	173/C	0.0639215	4002	✔
AT3G05936	unknown protein	3_1767960	0.00058	131	23.6636	22/T	29.4815	173/C	0.0639215	5872
AT3G05937	unknown protein	3_1767960	0.00058	131	23.6636	22/T	29.4815	173/C	0.0639215	7942
AT3G05940	Protein of unknown function (DUF300)	3_1767960	0.00058	131	23.6636	22/T	29.4815	173/C	0.0639215	9404
AT3G50960	phosducin-like protein 3 homolog (PLP3a)	3_18951741	0.00059	132	33.941	78/A	25.4145	117/C	0.063863	-9313
AT3G50980	dehydrin xero 1 (XERO1)	3_18951741	0.00059	132	33.941	78/A	25.4145	117/C	0.063863	8876
AT3G50990	Peroxidase superfamily protein	3_18951741	0.00059	132	33.941	78/A	25.4145	117/C	0.063863	6930
AT3G51000	alpha/beta-Hydrolases superfamily protein	3_18951741	0.00059	132	33.941	78/A	25.4145	117/C	0.063863	-3120
AT3G51010	unknown protein	3_18951741	0.00059	132	33.941	78/A	25.4145	117/C	0.063863	-1584
AT3G51020	unknown protein	3_18951741	0.00059	132	33.941	78/A	25.4145	117/C	0.063863	1520
AT3G51030	thioredoxin H-type 1 (TRX1)	3_18951741	0.00059	132	33.941	78/A	25.4145	117/C	0.063863	Intron	✔
AT3G51040	RTE1-homolog (RTH)	3_18951741	0.00059	132	33.941	78/A	25.4145	117/C	0.063863	381	✔
AT3G51050	FG-GAP repeat-containing protein	3_18951741	0.00059	132	33.941	78/A	25.4145	117/C	0.063863	-182	✔
AT3G05520	Subunits of heterodimeric actin filament capping protein Capz superfamily	3_1610674	0.0006	135	24.8288	52/C	30.2243	144/T	0.0634875	9237
AT3G05530	regulatory particle triple-A ATPase 5A (RPT5A)	3_1610674	0.0006	135	24.8288	52/C	30.2243	144/T	0.0634875	4443
AT3G05540	Methionine sulfoxide reductase (MSS4-like) family protein	3_1610674	0.0006	135	24.8288	52/C	30.2243	144/T	0.0634875	-644
AT3G05545	RING/U-box superfamily protein	3_1610674	0.0006	135	24.8288	52/C	30.2243	144/T	0.0634875	Intron	✔
AT3G05550	Hypoxia-responsive family protein	3_1610674	0.0006	135	24.8288	52/C	30.2243	144/T	0.0634875	-186	✔
AT3G05560	Ribosomal L22e protein family	3_1610674	0.0006	135	24.8288	52/C	30.2243	144/T	0.0634875	-1504
AT3G05570	unknown protein	3_1610674	0.0006	135	24.8288	52/C	30.2243	144/T	0.0634875	5428
AT3G05580	Calcineurin-like metallo-phosphoesterase superfamily protein	3_1610674	0.0006	135	24.8288	52/C	30.2243	144/T	0.0634875	7173
AT3G05590	ribosomal protein L18 (RPL18)	3_1610674	0.0006	135	24.8288	52/C	30.2243	144/T	0.0634875	-8783
AT4G10810	unknown protein	4_6657707	0.00061	137	25.4479	94/T	31.8755	102/A	0.0633701	-9371
AT4G10820	F-box family protein	4_6657707	0.00061	137	25.4479	94/T	31.8755	102/A	0.0633701	-6798
AT4G10840	Tetratricopeptide repeat (TPR)-like superfamily protein	4_6657707	0.00061	137	25.4479	94/T	31.8755	102/A	0.0633701	Exon	✔
AT4G10845	unknown protein	4_6657707	0.00061	137	25.4479	94/T	31.8755	102/A	0.0633701	-2888
AT3G03220	expansin A13 (EXPA13)	3_755278	0.00061	138	25.4769	65/A	30.3792	130/G	0.0641984	-9231	✔
AT3G03230	alpha/beta-Hydrolases superfamily protein	3_755278	0.00061	138	25.4769	65/A	30.3792	130/G	0.0641984	-7269	✔
AT3G03240	alpha/beta-Hydrolases superfamily protein	3_755278	0.00061	138	25.4769	65/A	30.3792	130/G	0.0641984	-4678	✔
AT3G03250	UDP-GLUCOSE PYROPHOSPHORYLASE 1 (UGP1)	3_755278	0.00061	138	25.4769	65/A	30.3792	130/G	0.0641984	Prom	✔
AT3G03260	homeodomain GLABROUS 8 (HDG8)	3_755278	0.00061	138	25.4769	65/A	30.3792	130/G	0.0641984	Exon	✔
AT3G03270	Adenine nucleotide alpha hydrolases-like superfamily protein	3_755278	0.00061	138	25.4769	65/A	30.3792	130/G	0.0641984	6032
AT3G03272	unknown function	3_755278	0.00061	138	25.4769	65/A	30.3792	130/G	0.0641984	8379
AT3G03280	unknown protein	3_755278	0.00061	138	25.4769	65/A	30.3792	130/G	0.0641984	-8181
AT3G03290	Adenine nucleotide alpha hydrolases-like superfamily protein	3_755278	0.00061	138	25.4769	65/A	30.3792	130/G	0.0641984	-9467
AT4G04180	P-loop containing nucleoside triphosphate hydrolases superfamily protein	4_2026090	0.00061	139	25.5349	86/G	31.34	110/A	0.0632519	2098
AT4G04190	unknown protein	4_2026090	0.00061	139	25.5349	86/G	31.34	110/A	0.0632519	Intron	✔
AT4G04200	Microsomal signal peptidase 25 kDa subunit (SPC25)	4_2026090	0.00061	139	25.5349	86/G	31.34	110/A	0.0632519	Prom	✔
AT4G04210	plant UBX domain containing protein 4 (PUX4)	4_2026090	0.00061	139	25.5349	86/G	31.34	110/A	0.0632519	-2229
AT4G04220	receptor like protein 46 (RLP46)	4_2026090	0.00061	139	25.5349	86/G	31.34	110/A	0.0632519	-5337
AT4G23070	RHOMBOID-like protein 7 (RBL7)	4_12102830	0.00062	140	22.372	25/A	29.7316	171/T	0.0631564	-8753
AT4G23080	Protein of Unknown Function (DUF239)	4_12102830	0.00062	140	22.372	25/A	29.7316	171/T	0.0631564	3942
AT4G23090	unknown protein	4_12102830	0.00062	140	22.372	25/A	29.7316	171/T	0.0631564	Prom	✔
AT4G23100	glutamate-cysteine ligase (GSH1)	4_12102830	0.00062	140	22.372	25/A	29.7316	171/T	0.0631564	UTR	✔
AT4G23103	unknown protein	4_12102830	0.00062	140	22.372	25/A	29.7316	171/T	0.0631564	5740
AT4G23110	insulin-like growth factor binding	4_12102830	0.00062	140	22.372	25/A	29.7316	171/T	0.0631564	-6027
AT4G23120	Bromo-adjacent homology (BAH) domain-containing protein	4_12102830	0.00062	140	22.372	25/A	29.7316	171/T	0.0631564	-8478
"candidate gene" in the last colum indicates that the gene was located in LD of the GWAS detected SNP.

## Sheet: Supplementary Table S6
Supplementary Table S6 List of genes located within 10 kb of the top 160 SNPs in GWAS for proton tolerance
AGI code	Discription	SNP (Chr_position)	P-value	rank	Minor		Major		markerR2	SNP location	located within LD block
					RRL (%)	N/allele	RRL (%)	N/allele
AT4G13500	unknown protein	4_7859717	1.54605e-05	1	45.2531	32/G	40.094	168/C	0.0955538	Prom	✔
AT4G13510	ammonium transporter 1;1 (AMT1;1)	4_7859717	1.54605e-05	1	45.2531	32/G	40.094	168/C	0.0955538	Exon	✔
AT4G13520	small acidic protein 1 (SMAP1)	4_7859717	1.54605e-05	1	45.2531	32/G	40.094	168/C	0.0955538	-2677
AT4G13530	unknown protein	4_7859717	1.54605e-05	1	45.2531	32/G	40.094	168/C	0.0955538	-5002
AT4G13540	unknown protein	4_7859717	1.54605e-05	1	45.2531	32/G	40.094	168/C	0.0955538	-8157
AT2G25490	EIN3-binding F box protein 1 (EBF1)	2_10861138	2.34281e-05	2	31.97	10/C	41.3905	190/T	0.0913117	-8606
AT2G25500	Inosine triphosphate pyrophosphatase family protein	2_10861138	2.34281e-05	2	31.97	10/C	41.3905	190/T	0.0913117	-4190
AT2G25510	unknown protein	2_10861138	2.34281e-05	2	31.97	10/C	41.3905	190/T	0.0913117	3982
AT2G25520	Drug/metabolite transporter superfamily protein	2_10861138	2.34281e-05	2	31.97	10/C	41.3905	190/T	0.0913117	Exon	✔
AT2G25530	AFG1-like ATPase family protein	2_10861138	2.34281e-05	2	31.97	10/C	41.3905	190/T	0.0913117	Prom	✔
AT2G25540	cellulose synthase 10 (CESA10)	2_10861138	2.34281e-05	2	31.97	10/C	41.3905	190/T	0.0913117	5684
AT5G03290	isocitrate dehydrogenase V (IDH-V)	5_803494	2.63873e-05	3	43	64/T	39.9404	136/G	0.0901025	7312
AT5G03300	adenosine kinase 2 (ADK2)	5_803494	2.63873e-05	3	43	64/T	39.9404	136/G	0.0901025	4318
AT5G03310	SAUR-like auxin-responsive protein family	5_803494	2.63873e-05	3	43	64/T	39.9404	136/G	0.0901025	-1788
AT5G03320	PATTERN-TRIGGERED IMMUNITY COMPROMISED RECEPTOR-LIKE CYTOPLASMIC KINASE 2 (PCRK2)	5_803494	2.63873e-05	3	43	64/T	39.9404	136/G	0.0901025	Intron	✔
AT5G03330	Cysteine proteinases superfamily protein	5_803494	2.63873e-05	3	43	64/T	39.9404	136/G	0.0901025	-1470
AT5G03340	CELL DIVISION CYCLE 48C (CDC48C)	5_803494	2.63873e-05	3	43	64/T	39.9404	136/G	0.0901025	6454
AT5G03345	PSI-INTERACTING ROOT-CELL ENRICHED 2 (PRCE2)	5_803494	2.63873e-05	3	43	64/T	39.9404	136/G	0.0901025	-8591
AT1G30280	Chaperone DnaJ-domain superfamily protein	1_10669988	3.72204e-05	4	37.3323	31/C	41.5775	169/G	0.0866175	-3320
AT1G30290	Tetratricopeptide repeat (TPR)-like superfamily protein	1_10669988	3.72204e-05	4	37.3323	31/C	41.5775	169/G	0.0866175	332	✔
AT1G30300	Metallo-hydrolase/oxidoreductase superfamily protein	1_10669988	3.72204e-05	4	37.3323	31/C	41.5775	169/G	0.0866175	-1010	✔
AT1G30320	Remorin family protein	1_10669988	3.72204e-05	4	37.3323	31/C	41.5775	169/G	0.0866175	-8258
AT5G24280	GAMMA-IRRADIATION AND MITOMYCIN C INDUCED 1 (GMI1)	5_8269335	4.19293e-05	5	38.3961	51/G	41.6345	142/A	0.0873542	-5181
AT5G24290	Vacuolar iron transporter (VIT) family protein	5_8269335	4.19293e-05	5	38.3961	51/G	41.6345	142/A	0.0873542	-1594
AT5G24300	STARCH SYNTHASE 1 (SS1)	5_8269335	4.19293e-05	5	38.3961	51/G	41.6345	142/A	0.0873542	Intron	✔
AT5G24310	ABL interactor-like protein 3 (ABIL3)	5_8269335	4.19293e-05	5	38.3961	51/G	41.6345	142/A	0.0873542	-2211
AT5G24313	unknown protein	5_8269335	4.19293e-05	5	38.3961	51/G	41.6345	142/A	0.0873542	7450
AT5G24314	plastid transcriptionally active7 (PTAC7)	5_8269335	4.19293e-05	5	38.3961	51/G	41.6345	142/A	0.0873542	-6365
AT5G24316	proline-rich family protein	5_8269335	4.19293e-05	5	38.3961	51/G	41.6345	142/A	0.0873542	9844
AT1G30280	Chaperone DnaJ-domain superfamily protein	1_10673625	4.42465e-05	6	37.4258	31/G	41.5604	169/A	0.0848725	-6957
AT1G30290	Tetratricopeptide repeat (TPR)-like superfamily protein	1_10673625	4.42465e-05	6	37.4258	31/G	41.5604	169/A	0.0848725	Prom	✔
AT1G30300	Metallo-hydrolase/oxidoreductase superfamily protein	1_10673625	4.42465e-05	6	37.4258	31/G	41.5604	169/A	0.0848725	Exon	✔
AT1G30320	Remorin family protein	1_10673625	4.42465e-05	6	37.4258	31/G	41.5604	169/A	0.0848725	-4621
AT4G32660	AME3	4_15768828	4.54531e-05	7	37.7294	34/T	41.6497	165/C	0.0862441	9514
AT4G32670	RING/FYVE/PHD zinc finger superfamily protein	4_15768828	4.54531e-05	7	37.7294	34/T	41.6497	165/C	0.0862441	-3903
AT4G32680	transmembrane protein	4_15768828	4.54531e-05	7	37.7294	34/T	41.6497	165/C	0.0862441	-1714	✔
AT4G32690	hemoglobin 3 (GLB3)	4_15768828	4.54531e-05	7	37.7294	34/T	41.6497	165/C	0.0862441	1722	✔
AT4G32700	helicases	4_15768828	4.54531e-05	7	37.7294	34/T	41.6497	165/C	0.0862441	Prom	✔
AT2G25540	cellulose synthase 10 (CESA10)	2_10880831	5.76897e-05	8	34.09	20/A	41.6783	180/G	0.082204	-6754	✔
AT2G25560	DNAJ heat shock N-terminal domain-containing protein	2_10880831	5.76897e-05	8	34.09	20/A	41.6783	180/G	0.082204	Exon	✔
AT2G25565	Zinc finger	2_10880831	5.76897e-05	8	34.09	20/A	41.6783	180/G	0.082204	3231
AT2G25570	binding	2_10880831	5.76897e-05	8	34.09	20/A	41.6783	180/G	0.082204	4135
AT2G25580	Tetratricopeptide repeat (TPR)-like superfamily protein	2_10880831	5.76897e-05	8	34.09	20/A	41.6783	180/G	0.082204	-5183
AT2G25590	Plant Tudor-like protein	2_10880831	5.76897e-05	8	34.09	20/A	41.6783	180/G	0.082204	-8072
AT1G64190	6-phosphogluconate dehydrogenase family protein	1_23836564	5.85117e-05	9	39.1157	70/G	41.8984	129/A	0.0820831	-7428
AT1G64195	Defensin-like (DEFL) family protein	1_23836564	5.85117e-05	9	39.1157	70/G	41.8984	129/A	0.0820831	-6516
AT1G64200	vacuolar H+-ATPase subunit E isoform 3 (VHA-E3)	1_23836564	5.85117e-05	9	39.1157	70/G	41.8984	129/A	0.0820831	-4562
AT1G64210	Leucine-rich repeat protein kinase family protein	1_23836564	5.85117e-05	9	39.1157	70/G	41.8984	129/A	0.0820831	3701
AT1G64220	translocase of outer membrane 7 kDa subunit 2 (TOM7-2)	1_23836564	5.85117e-05	9	39.1157	70/G	41.8984	129/A	0.0820831	-1243
AT1G64230	ubiquitin-conjugating enzyme 28 (UBC28)	1_23836564	5.85117e-05	9	39.1157	70/G	41.8984	129/A	0.0820831	1028
AT1G64235	Bifunctional inhibitor/lipid-transfer protein/seed storage 2S albumin superfamily protein	1_23836564	5.85117e-05	9	39.1157	70/G	41.8984	129/A	0.0820831	Exon	✔
AT1G64255	MuDR family transposase	1_23836564	5.85117e-05	9	39.1157	70/G	41.8984	129/A	0.0820831	-6390
AT1G64260	MuDR family transposase	1_23836564	5.85117e-05	9	39.1157	70/G	41.8984	129/A	0.0820831	-9192
AT1G30280	Chaperone DnaJ-domain superfamily protein	1_10669455	7.11121e-05	10	37.4862	29/G	41.5018	171/C	0.0801077	-2787
AT1G30290	Tetratricopeptide repeat (TPR)-like superfamily protein	1_10669455	7.11121e-05	10	37.4862	29/G	41.5018	171/C	0.0801077	865	✔
AT1G30300	Metallo-hydrolase/oxidoreductase superfamily protein	1_10669455	7.11121e-05	10	37.4862	29/G	41.5018	171/C	0.0801077	-1543	✔
AT1G30320	Remorin family protein	1_10669455	7.11121e-05	10	37.4862	29/G	41.5018	171/C	0.0801077	-8791
AT2G25490	EIN3-binding F box protein 1 (EBF1)	2_10861655	7.49661e-05	11	32.56	10/G	41.3595	190/T	0.0795799	-9123
AT2G25500	Inosine triphosphate pyrophosphatase family protein	2_10861655	7.49661e-05	11	32.56	10/G	41.3595	190/T	0.0795799	-4707
AT2G25510	unknown protein	2_10861655	7.49661e-05	11	32.56	10/G	41.3595	190/T	0.0795799	4499
AT2G25520	Drug/metabolite transporter superfamily protein	2_10861655	7.49661e-05	11	32.56	10/G	41.3595	190/T	0.0795799	Exon	✔
AT2G25530	AFG1-like ATPase family protein	2_10861655	7.49661e-05	11	32.56	10/G	41.3595	190/T	0.0795799	Prom	✔
AT2G25540	cellulose synthase 10 (CESA10)	2_10861655	7.49661e-05	11	32.56	10/G	41.3595	190/T	0.0795799	5167
AT1G30270	CBL-interacting protein kinase 23 (CIPK23)	1_10668478	8.27028e-05	12	37.61	30/T	41.5035	170/G	0.0785988	9581
AT1G30280	Chaperone DnaJ-domain superfamily protein	1_10668478	8.27028e-05	12	37.61	30/T	41.5035	170/G	0.0785988	-1810	✔
AT1G30290	Tetratricopeptide repeat (TPR)-like superfamily protein	1_10668478	8.27028e-05	12	37.61	30/T	41.5035	170/G	0.0785988	1842	✔
AT1G30300	Metallo-hydrolase/oxidoreductase superfamily protein	1_10668478	8.27028e-05	12	37.61	30/T	41.5035	170/G	0.0785988	-2520	✔
AT1G30320	Remorin family protein	1_10668478	8.27028e-05	12	37.61	30/T	41.5035	170/G	0.0785988	-9768
AT1G30270	CBL-interacting protein kinase 23 (CIPK23)	1_10668655	8.27028e-05	13	37.61	30/A	41.5035	170/G	0.0785988	9758
AT1G30280	Chaperone DnaJ-domain superfamily protein	1_10668655	8.27028e-05	13	37.61	30/A	41.5035	170/G	0.0785988	-1987
AT1G30290	Tetratricopeptide repeat (TPR)-like superfamily protein	1_10668655	8.27028e-05	13	37.61	30/A	41.5035	170/G	0.0785988	1665	✔
AT1G30300	Metallo-hydrolase/oxidoreductase superfamily protein	1_10668655	8.27028e-05	13	37.61	30/A	41.5035	170/G	0.0785988	-2343	✔
AT1G30320	Remorin family protein	1_10668655	8.27028e-05	13	37.61	30/A	41.5035	170/G	0.0785988	-9591
AT1G30280	Chaperone DnaJ-domain superfamily protein	1_10670185	8.27028e-05	14	37.61	30/A	41.5035	170/G	0.0785988	-3517
AT1G30290	Tetratricopeptide repeat (TPR)-like superfamily protein	1_10670185	8.27028e-05	14	37.61	30/A	41.5035	170/G	0.0785988	135	✔
AT1G30300	Metallo-hydrolase/oxidoreductase superfamily protein	1_10670185	8.27028e-05	14	37.61	30/A	41.5035	170/G	0.0785988	-813	✔
AT1G30320	Remorin family protein	1_10670185	8.27028e-05	14	37.61	30/A	41.5035	170/G	0.0785988	-8061
AT1G30280	Chaperone DnaJ-domain superfamily protein	1_10670620	8.27028e-05	15	37.61	30/A	41.5035	170/G	0.0785988	-3952
AT1G30290	Tetratricopeptide repeat (TPR)-like superfamily protein	1_10670620	8.27028e-05	15	37.61	30/A	41.5035	170/G	0.0785988	Exon	✔
AT1G30300	Metallo-hydrolase/oxidoreductase superfamily protein	1_10670620	8.27028e-05	15	37.61	30/A	41.5035	170/G	0.0785988	-378	✔
AT1G30320	Remorin family protein	1_10670620	8.27028e-05	15	37.61	30/A	41.5035	170/G	0.0785988	-7626
AT1G30280	Chaperone DnaJ-domain superfamily protein	1_10671235	8.27028e-05	16	37.61	30/T	41.5035	170/A	0.0785988	-4567
AT1G30290	Tetratricopeptide repeat (TPR)-like superfamily protein	1_10671235	8.27028e-05	16	37.61	30/T	41.5035	170/A	0.0785988	Exon	✔
AT1G30300	Metallo-hydrolase/oxidoreductase superfamily protein	1_10671235	8.27028e-05	16	37.61	30/T	41.5035	170/A	0.0785988	Prom	✔
AT1G30320	Remorin family protein	1_10671235	8.27028e-05	16	37.61	30/T	41.5035	170/A	0.0785988	-7011
AT1G30280	Chaperone DnaJ-domain superfamily protein	1_10671772	8.27028e-05	17	37.61	30/G	41.5035	170/A	0.0785988	-5104
AT1G30290	Tetratricopeptide repeat (TPR)-like superfamily protein	1_10671772	8.27028e-05	17	37.61	30/G	41.5035	170/A	0.0785988	Exon	✔
AT1G30300	Metallo-hydrolase/oxidoreductase superfamily protein	1_10671772	8.27028e-05	17	37.61	30/G	41.5035	170/A	0.0785988	Prom	✔
AT1G30320	Remorin family protein	1_10671772	8.27028e-05	17	37.61	30/G	41.5035	170/A	0.0785988	-6474
AT1G30280	Chaperone DnaJ-domain superfamily protein	1_10672355	8.27028e-05	18	37.61	30/A	41.5035	170/G	0.0785988	-5687
AT1G30290	Tetratricopeptide repeat (TPR)-like superfamily protein	1_10672355	8.27028e-05	18	37.61	30/A	41.5035	170/G	0.0785988	Exon	✔
AT1G30300	Metallo-hydrolase/oxidoreductase superfamily protein	1_10672355	8.27028e-05	18	37.61	30/A	41.5035	170/G	0.0785988	Prom	✔
AT1G30320	Remorin family protein	1_10672355	8.27028e-05	18	37.61	30/A	41.5035	170/G	0.0785988	-5891
AT1G76700	DNAJ heat shock N-terminal domain-containing protein	1_28791009	8.51928e-05	19	37.5478	46/C	41.9266	154/T	0.0783028	-5761	✔
AT1G76705	calmodulin binding	1_28791009	8.51928e-05	19	37.5478	46/C	41.9266	154/T	0.0783028	3681	✔
AT1G76710	SET domain group 26 (SDG26)	1_28791009	8.51928e-05	19	37.5478	46/C	41.9266	154/T	0.0783028	Exon	✔
AT1G76720	eukaryotic translation initiation factor 2 (eIF-2) family protein	1_28791009	8.51928e-05	19	37.5478	46/C	41.9266	154/T	0.0783028	3135	✔
AT1G76728	unknown protein	1_28791009	8.51928e-05	19	37.5478	46/C	41.9266	154/T	0.0783028	-9624
AT1G30280	Chaperone DnaJ-domain superfamily protein	1_10669086	0.000101854	20	37.5172	29/G	41.4965	171/A	0.0765234	-2418
AT1G30290	Tetratricopeptide repeat (TPR)-like superfamily protein	1_10669086	0.000101854	20	37.5172	29/G	41.4965	171/A	0.0765234	1234	✔
AT1G30300	Metallo-hydrolase/oxidoreductase superfamily protein	1_10669086	0.000101854	20	37.5172	29/G	41.4965	171/A	0.0765234	-1912	✔
AT1G30320	Remorin family protein	1_10669086	0.000101854	20	37.5172	29/G	41.4965	171/A	0.0765234	-9160
AT1G20290	SWI-SNF-related chromatin binding protein	1_7037834	0.000133577	21	42.65	92/C	39.4454	108/G	0.0738323	-6136	✔
AT1G20300	Pentatricopeptide repeat (PPR) superfamily protein	1_7037834	0.000133577	21	42.65	92/C	39.4454	108/G	0.0738323	6299	✔
AT1G20310	unknown protein	1_7037834	0.000133577	21	42.65	92/C	39.4454	108/G	0.0738323	4626	✔
AT1G20320	Haloacid dehalogenase-like hydrolase (HAD) superfamily protein	1_7037834	0.000133577	21	42.65	92/C	39.4454	108/G	0.0738323	-960	✔
AT1G20330	sterol methyltransferase 2 (SMT2)	1_7037834	0.000133577	21	42.65	92/C	39.4454	108/G	0.0738323	854	✔
AT1G20340	DNA-DAMAGE-REPAIR/TOLERATION PROTEIN 112 (DRT112)	1_7037834	0.000133577	21	42.65	92/C	39.4454	108/G	0.0738323	4595
AT1G20350	translocase inner membrane subunit 17-1 (TIM17-1)	1_7037834	0.000133577	21	42.65	92/C	39.4454	108/G	0.0738323	-3879
AT1G20360	F-box family protein	1_7037834	0.000133577	21	42.65	92/C	39.4454	108/G	0.0738323	8670
AT2G25540	cellulose synthase 10 (CESA10)	2_10880989	0.000137481	22	35.3375	24/G	41.6807	176/C	0.0735471	-6912
AT2G25560	DNAJ heat shock N-terminal domain-containing protein	2_10880989	0.000137481	22	35.3375	24/G	41.6807	176/C	0.0735471	Intron	✔
AT2G25565	Zinc finger	2_10880989	0.000137481	22	35.3375	24/G	41.6807	176/C	0.0735471	3073
AT2G25570	binding	2_10880989	0.000137481	22	35.3375	24/G	41.6807	176/C	0.0735471	3977
AT2G25580	Tetratricopeptide repeat (TPR)-like superfamily protein	2_10880989	0.000137481	22	35.3375	24/G	41.6807	176/C	0.0735471	-5025
AT2G25590	Plant Tudor-like protein	2_10880989	0.000137481	22	35.3375	24/G	41.6807	176/C	0.0735471	-7914
AT1G20270	2-oxoglutarate (2OG) and Fe(II)-dependent oxygenase superfamily protein	1_7034116	0.000151037	23	42.7284	81/A	39.6432	118/T	0.0727353	-9049
AT1G20280	homeobox-leucine zipper protein-related	1_7034116	0.000151037	23	42.7284	81/A	39.6432	118/T	0.0727353	9904
AT1G20290	SWI-SNF-related chromatin binding protein	1_7034116	0.000151037	23	42.7284	81/A	39.6432	118/T	0.0727353	-2418	✔
AT1G20300	Pentatricopeptide repeat (PPR) superfamily protein	1_7034116	0.000151037	23	42.7284	81/A	39.6432	118/T	0.0727353	2581	✔
AT1G20310	unknown protein	1_7034116	0.000151037	23	42.7284	81/A	39.6432	118/T	0.0727353	908	✔
AT1G20320	Haloacid dehalogenase-like hydrolase (HAD) superfamily protein	1_7034116	0.000151037	23	42.7284	81/A	39.6432	118/T	0.0727353	Exon	✔
AT1G20330	sterol methyltransferase 2 (SMT2)	1_7034116	0.000151037	23	42.7284	81/A	39.6432	118/T	0.0727353	4572
AT1G20340	DNA-DAMAGE-REPAIR/TOLERATION PROTEIN 112 (DRT112)	1_7034116	0.000151037	23	42.7284	81/A	39.6432	118/T	0.0727353	8313
AT1G20350	translocase inner membrane subunit 17-1 (TIM17-1)	1_7034116	0.000151037	23	42.7284	81/A	39.6432	118/T	0.0727353	-7597
AT1G30280	Chaperone DnaJ-domain superfamily protein	1_10669811	0.000161241	24	37.5655	29/A	41.4676	170/C	0.0720884	-3143
AT1G30290	Tetratricopeptide repeat (TPR)-like superfamily protein	1_10669811	0.000161241	24	37.5655	29/A	41.4676	170/C	0.0720884	509	✔
AT1G30300	Metallo-hydrolase/oxidoreductase superfamily protein	1_10669811	0.000161241	24	37.5655	29/A	41.4676	170/C	0.0720884	-1187	✔
AT1G30320	Remorin family protein	1_10669811	0.000161241	24	37.5655	29/A	41.4676	170/C	0.0720884	-8435
AT4G17610	tRNA/rRNA methyltransferase (SpoU) family protein	4_9820560	0.000163424	25	37.4381	42/T	41.8449	158/A	0.0718384	-3650
AT4G17615	calcineurin B-like protein 1 (CBL1)	4_9820560	0.000163424	25	37.4381	42/T	41.8449	158/A	0.0718384	1248
AT4G17616	Pentatricopeptide repeat (PPR) superfamily protein	4_9820560	0.000163424	25	37.4381	42/T	41.8449	158/A	0.0718384	Exon	✔
AT4G17620	glycine-rich protein	4_9820560	0.000163424	25	37.4381	42/T	41.8449	158/A	0.0718384	Prom	✔
AT4G17640	casein kinase II beta chain 2 (CKB2)	4_9820560	0.000163424	25	37.4381	42/T	41.8449	158/A	0.0718384	-2593	✔
AT4G17650	Polyketide cyclase / dehydrase and lipid transport protein	4_9820560	0.000163424	25	37.4381	42/T	41.8449	158/A	0.0718384	-4955
AT4G17660	Protein kinase superfamily protein	4_9820560	0.000163424	25	37.4381	42/T	41.8449	158/A	0.0718384	-8799
AT3G11430	glycerol-3-phosphate acyltransferase 5 (GPAT5)	3_3606272	0.000172539	26	35.6533	30/A	41.8488	170/G	0.071303	8320
AT3G11435	MIR172C	3_3606272	0.000172539	26	35.6533	30/A	41.8488	170/G	0.071303	-4364
AT3G11440	myb domain protein 65 (MYB65)	3_3606272	0.000172539	26	35.6533	30/A	41.8488	170/G	0.071303	1168
AT3G11450	DnaJ domain	3_3606272	0.000172539	26	35.6533	30/A	41.8488	170/G	0.071303	Exon	✔
AT3G11460	Pentatricopeptide repeat (PPR) superfamily protein	3_3606272	0.000172539	26	35.6533	30/A	41.8488	170/G	0.071303	Prom	✔
AT3G11470	4'-phosphopantetheinyl transferase superfamily	3_3606272	0.000172539	26	35.6533	30/A	41.8488	170/G	0.071303	3875	✔
AT3G11480	BSMT1	3_3606272	0.000172539	26	35.6533	30/A	41.8488	170/G	0.071303	-6165
AT1G32160	Protein of unknown function (DUF760)	1_11579494	0.000178495	27	34.5833	18/A	41.5956	181/G	0.0716166	9107
AT1G32170	xyloglucan endotransglucosylase/hydrolase 30 (XTH30)	1_11579494	0.000178495	27	34.5833	18/A	41.5956	181/G	0.0716166	1567	✔
AT1G32180	cellulose synthase-like D6 (CSLD6)	1_11579494	0.000178495	27	34.5833	18/A	41.5956	181/G	0.0716166	7022
AT2G25490	EIN3-binding F box protein 1 (EBF1)	2_10861816	0.00019131	28	32.6556	9/T	41.3089	191/G	0.0702855	-9284
AT2G25500	Inosine triphosphate pyrophosphatase family protein	2_10861816	0.00019131	28	32.6556	9/T	41.3089	191/G	0.0702855	-4868
AT2G25510	unknown protein	2_10861816	0.00019131	28	32.6556	9/T	41.3089	191/G	0.0702855	4660
AT2G25520	Drug/metabolite transporter superfamily protein	2_10861816	0.00019131	28	32.6556	9/T	41.3089	191/G	0.0702855	Exon	✔
AT2G25530	AFG1-like ATPase family protein	2_10861816	0.00019131	28	32.6556	9/T	41.3089	191/G	0.0702855	Prom	✔
AT2G25540	cellulose synthase 10 (CESA10)	2_10861816	0.00019131	28	32.6556	9/T	41.3089	191/G	0.0702855	5006
AT2G25540	cellulose synthase 10 (CESA10)	2_10882000	0.000197397	29	34.1722	18/T	41.5868	182/C	0.0699773	-7923	✔
AT2G25560	DNAJ heat shock N-terminal domain-containing protein	2_10882000	0.000197397	29	34.1722	18/T	41.5868	182/C	0.0699773	Exon	✔
AT2G25565	Zinc finger	2_10882000	0.000197397	29	34.1722	18/T	41.5868	182/C	0.0699773	2062
AT2G25570	binding	2_10882000	0.000197397	29	34.1722	18/T	41.5868	182/C	0.0699773	2966
AT2G25580	Tetratricopeptide repeat (TPR)-like superfamily protein	2_10882000	0.000197397	29	34.1722	18/T	41.5868	182/C	0.0699773	-4014
AT2G25590	Plant Tudor-like protein	2_10882000	0.000197397	29	34.1722	18/T	41.5868	182/C	0.0699773	-6903
AT2G25540	cellulose synthase 10 (CESA10)	2_10883052	0.000197397	30	34.1722	18/T	41.5868	182/C	0.0699773	-8975	✔
AT2G25560	DNAJ heat shock N-terminal domain-containing protein	2_10883052	0.000197397	30	34.1722	18/T	41.5868	182/C	0.0699773	Exon	✔
AT2G25565	Zinc finger	2_10883052	0.000197397	30	34.1722	18/T	41.5868	182/C	0.0699773	1010
AT2G25570	binding	2_10883052	0.000197397	30	34.1722	18/T	41.5868	182/C	0.0699773	1914
AT2G25580	Tetratricopeptide repeat (TPR)-like superfamily protein	2_10883052	0.000197397	30	34.1722	18/T	41.5868	182/C	0.0699773	-2962
AT2G25590	Plant Tudor-like protein	2_10883052	0.000197397	30	34.1722	18/T	41.5868	182/C	0.0699773	-5851
AT2G25600	Shaker pollen inward K+ channel (SPIK)	2_10883052	0.000197397	30	34.1722	18/T	41.5868	182/C	0.0699773	-9434
AT2G25540	cellulose synthase 10 (CESA10)	2_10881188	0.00021392	31	35.3708	24/C	41.6598	174/G	0.0693996	-7111
AT2G25560	DNAJ heat shock N-terminal domain-containing protein	2_10881188	0.00021392	31	35.3708	24/C	41.6598	174/G	0.0693996	Intron	✔
AT2G25565	Zinc finger	2_10881188	0.00021392	31	35.3708	24/C	41.6598	174/G	0.0693996	2874
AT2G25570	binding	2_10881188	0.00021392	31	35.3708	24/C	41.6598	174/G	0.0693996	3778
AT2G25580	Tetratricopeptide repeat (TPR)-like superfamily protein	2_10881188	0.00021392	31	35.3708	24/C	41.6598	174/G	0.0693996	-4826
AT2G25590	Plant Tudor-like protein	2_10881188	0.00021392	31	35.3708	24/C	41.6598	174/G	0.0693996	-7715
AT4G17610	tRNA/rRNA methyltransferase (SpoU) family protein	4_9823193	0.00022134	32	37.5659	41/G	41.7843	159/A	0.0688521	-6283
AT4G17615	calcineurin B-like protein 1 (CBL1)	4_9823193	0.00022134	32	37.5659	41/G	41.7843	159/A	0.0688521	3881
AT4G17616	Pentatricopeptide repeat (PPR) superfamily protein	4_9823193	0.00022134	32	37.5659	41/G	41.7843	159/A	0.0688521	1509	✔
AT4G17620	glycine-rich protein	4_9823193	0.00022134	32	37.5659	41/G	41.7843	159/A	0.0688521	Intron	✔
AT4G17640	casein kinase II beta chain 2 (CKB2)	4_9823193	0.00022134	32	37.5659	41/G	41.7843	159/A	0.0688521	Prom	✔
AT4G17650	Polyketide cyclase / dehydrase and lipid transport protein	4_9823193	0.00022134	32	37.5659	41/G	41.7843	159/A	0.0688521	-2322
AT4G17660	Protein kinase superfamily protein	4_9823193	0.00022134	32	37.5659	41/G	41.7843	159/A	0.0688521	-6166
AT4G03560	two-pore channel 1 (TPC1)	4_1593423	0.0002348	33	37.7756	41/C	41.6503	157/T	0.0685921	7457
AT4G03565	Cystatin/monellin superfamily protein	4_1593423	0.0002348	33	37.7756	41/C	41.6503	157/T	0.0685921	5689
AT4G03566	unknown protein	4_1593423	0.0002348	33	37.7756	41/C	41.6503	157/T	0.0685921	-2193
AT4G03570	Cystatin/monellin superfamily protein	4_1593423	0.0002348	33	37.7756	41/C	41.6503	157/T	0.0685921	Intron	✔
AT4G03580	BEST Arabidopsis thaliana protein match is: Cysteine proteinases superfamily protein (TAIR:AT5G17080.1)	4_1593423	0.0002348	33	37.7756	41/C	41.6503	157/T	0.0685921	-1562
AT4G03590	Cystatin/monellin superfamily protein	4_1593423	0.0002348	33	37.7756	41/C	41.6503	157/T	0.0685921	7357
AT4G03610	Metallo-hydrolase/oxidoreductase superfamily protein	4_1593423	0.0002348	33	37.7756	41/C	41.6503	157/T	0.0685921	-9516
AT4G36520	Chaperone DnaJ-domain superfamily protein	4_17242938	0.000235552	34	38.7472	53/T	41.6153	144/C	0.0688143	-5420
AT4G36530	alpha/beta-Hydrolases superfamily protein	4_17242938	0.000235552	34	38.7472	53/T	41.6153	144/C	0.0688143	Prom	✔
AT4G36540	BR enhanced expression 2 (BEE2)	4_17242938	0.000235552	34	38.7472	53/T	41.6153	144/C	0.0688143	Prom	✔
AT4G36550	ARM repeat superfamily protein	4_17242938	0.000235552	34	38.7472	53/T	41.6153	144/C	0.0688143	2462
AT4G36560	unknown protein	4_17242938	0.000235552	34	38.7472	53/T	41.6153	144/C	0.0688143	-7719
AT4G36570	RAD-like 3 (RL3)	4_17242938	0.000235552	34	38.7472	53/T	41.6153	144/C	0.0688143	-9722
AT3G28150	TRICHOME BIREFRINGENCE-LIKE 22 (TBL22)	3_10481841	0.000242936	35	46.4773	22/T	40.0842	171/C	0.0695187	-6087
AT3G28155	BEST Arabidopsis thaliana protein match is: ARM repeat superfamily protein (TAIR:AT2G35630.1)	3_10481841	0.000242936	35	46.4773	22/T	40.0842	171/C	0.0695187	3460	✔
AT1G76640	Calcium-binding EF-hand family protein	1_28776833	0.000249382	36	37.8143	49/G	41.9272	151/A	0.0676821	-9030
AT1G76650	calmodulin-like 38 (CML38)	1_28776833	0.000249382	36	37.8143	49/G	41.9272	151/A	0.0676821	-6695
AT1G76660	FUNCTIONS IN: molecular	1_28776833	0.000249382	36	37.8143	49/G	41.9272	151/A	0.0676821	-3424	✔
AT1G76670	Nucleotide-sugar transporter family protein	1_28776833	0.000249382	36	37.8143	49/G	41.9272	151/A	0.0676821	Prom	✔
AT1G76680	12-oxophytodienoate reductase 1 (OPR1)	1_28776833	0.000249382	36	37.8143	49/G	41.9272	151/A	0.0676821	Prom	✔
AT1G76690	12-oxophytodienoate reductase 2 (OPR2)	1_28776833	0.000249382	36	37.8143	49/G	41.9272	151/A	0.0676821	-57	✔
AT1G76700	DNAJ heat shock N-terminal domain-containing protein	1_28776833	0.000249382	36	37.8143	49/G	41.9272	151/A	0.0676821	3575	✔
AT1G76705	calmodulin binding	1_28776833	0.000249382	36	37.8143	49/G	41.9272	151/A	0.0676821	-7617	✔
AT3G46910	Cullin family protein	3_17284852	0.000271396	37	43.0583	48/T	40.2441	152/C	0.0668539	5200
AT3G46920	Protein kinase superfamily protein with octicosapeptide/Phox/Bem1p domain	3_17284852	0.000271396	37	43.0583	48/T	40.2441	152/C	0.0668539	Exon	✔
AT3G46930	Protein kinase superfamily protein	3_17284852	0.000271396	37	43.0583	48/T	40.2441	152/C	0.0668539	Prom	✔
AT3G46940	DUTP-PYROPHOSPHATASE-LIKE 1 (DUT1)	3_17284852	0.000271396	37	43.0583	48/T	40.2441	152/C	0.0668539	3342
AT3G46950	Mitochondrial transcription termination factor family protein	3_17284852	0.000271396	37	43.0583	48/T	40.2441	152/C	0.0668539	-2517
AT3G46960	RNA helicase	3_17284852	0.000271396	37	43.0583	48/T	40.2441	152/C	0.0668539	6021
AT1G47390	F-box and associated interaction domains-containing protein	1_17389961	0.000275042	38	42.3802	96/G	39.5712	104/T	0.0667234	9305
AT1G47395	unknown protein	1_17389961	0.000275042	38	42.3802	96/G	39.5712	104/T	0.0667234	6553
AT1G47400	unknown protein	1_17389961	0.000275042	38	42.3802	96/G	39.5712	104/T	0.0667234	3775
AT1G47410	unknown protein	1_17389961	0.000275042	38	42.3802	96/G	39.5712	104/T	0.0667234	-2121	✔
AT1G47420	succinate dehydrogenase 5 (SDH5)	1_17389961	0.000275042	38	42.3802	96/G	39.5712	104/T	0.0667234	5557
AT4G32650	potassium channel in Arabidopsis thaliana 3 (KAT3)	4_15763440	0.000281977	39	38.7729	48/C	41.5974	152/G	0.0664799	-6586
AT4G32660	AME3	4_15763440	0.000281977	39	38.7729	48/C	41.5974	152/G	0.0664799	4126
AT4G32670	RING/FYVE/PHD zinc finger superfamily protein	4_15763440	0.000281977	39	38.7729	48/C	41.5974	152/G	0.0664799	Prom	✔
AT4G32680	transmembrane protein	4_15763440	0.000281977	39	38.7729	48/C	41.5974	152/G	0.0664799	Exon	✔
AT4G32690	hemoglobin 3 (GLB3)	4_15763440	0.000281977	39	38.7729	48/C	41.5974	152/G	0.0664799	Prom	✔
AT4G32700	helicases	4_15763440	0.000281977	39	38.7729	48/C	41.5974	152/G	0.0664799	-1877	✔
AT4G32650	potassium channel in Arabidopsis thaliana 3 (KAT3)	4_15763475	0.000281977	40	38.7729	48/G	41.5974	152/C	0.0664799	-6621
AT4G32660	AME3	4_15763475	0.000281977	40	38.7729	48/G	41.5974	152/C	0.0664799	4161
AT4G32670	RING/FYVE/PHD zinc finger superfamily protein	4_15763475	0.000281977	40	38.7729	48/G	41.5974	152/C	0.0664799	Prom	✔
AT4G32680	transmembrane protein	4_15763475	0.000281977	40	38.7729	48/G	41.5974	152/C	0.0664799	Exon	✔
AT4G32690	hemoglobin 3 (GLB3)	4_15763475	0.000281977	40	38.7729	48/G	41.5974	152/C	0.0664799	Prom	✔
AT4G32700	helicases	4_15763475	0.000281977	40	38.7729	48/G	41.5974	152/C	0.0664799	-1842	✔
AT4G18360	Aldolase-type TIM barrel family protein	4_10155032	0.000293896	41	35.9462	13/A	41.2652	187/G	0.0660753	-4350
AT4G18370	DEGP protease 5 (DEG5)	4_10155032	0.000293896	41	35.9462	13/A	41.2652	187/G	0.0660753	3814
AT4G18372	Small nuclear ribonucleoprotein family protein	4_10155032	0.000293896	41	35.9462	13/A	41.2652	187/G	0.0660753	-912
AT4G18375	RNA-binding KH domain-containing protein	4_10155032	0.000293896	41	35.9462	13/A	41.2652	187/G	0.0660753	Exon	✔
AT4G18380	F-box family protein	4_10155032	0.000293896	41	35.9462	13/A	41.2652	187/G	0.0660753	-855
AT4G18390	TEOSINTE BRANCHED 1	4_10155032	0.000293896	41	35.9462	13/A	41.2652	187/G	0.0660753	7921
AT1G30280	Chaperone DnaJ-domain superfamily protein	1_10669361	0.000300699	42	37.8548	31/A	41.4817	169/G	0.0658517	-2693
AT1G30290	Tetratricopeptide repeat (TPR)-like superfamily protein	1_10669361	0.000300699	42	37.8548	31/A	41.4817	169/G	0.0658517	959	✔
AT1G30300	Metallo-hydrolase/oxidoreductase superfamily protein	1_10669361	0.000300699	42	37.8548	31/A	41.4817	169/G	0.0658517	-1637	✔
AT1G30320	Remorin family protein	1_10669361	0.000300699	42	37.8548	31/A	41.4817	169/G	0.0658517	-8885
AT1G30280	Chaperone DnaJ-domain superfamily protein	1_10670479	0.000303343	43	37.9548	31/C	41.4633	169/T	0.0657662	-3811
AT1G30290	Tetratricopeptide repeat (TPR)-like superfamily protein	1_10670479	0.000303343	43	37.9548	31/C	41.4633	169/T	0.0657662	Exon	✔
AT1G30300	Metallo-hydrolase/oxidoreductase superfamily protein	1_10670479	0.000303343	43	37.9548	31/C	41.4633	169/T	0.0657662	-519	✔
AT1G30320	Remorin family protein	1_10670479	0.000303343	43	37.9548	31/C	41.4633	169/T	0.0657662	-7767
AT3G17690	cyclic nucleotide gated channel 19 (CNGC19)	3_6056509	0.000314718	44	36.397	33/T	41.8132	167/C	0.0654069	8021
AT3G17700	cyclic nucleotide-binding transporter 1 (CNBT1)	3_6056509	0.000314718	44	36.397	33/T	41.8132	167/C	0.0654069	3957	✔
AT3G17710	F-box and associated interaction domains-containing protein	3_6056509	0.000314718	44	36.397	33/T	41.8132	167/C	0.0654069	Exon	✔
AT3G17712	unknown protein	3_6056509	0.000314718	44	36.397	33/T	41.8132	167/C	0.0654069	Prom	✔
AT3G17720	Pyridoxal phosphate (PLP)-dependent transferases superfamily protein	3_6056509	0.000314718	44	36.397	33/T	41.8132	167/C	0.0654069	-3937
AT3G17730	NAC domain containing protein 57 (NAC057)	3_6056509	0.000314718	44	36.397	33/T	41.8132	167/C	0.0654069	-5870
AT5G45610	SENSITIVE TO UV 2 (SUV2)	5_18510587	0.000318811	45	42.6174	69/T	39.9869	130/C	0.065386	-8914
AT5G45620	Proteasome component (PCI) domain protein	5_18510587	0.000318811	45	42.6174	69/T	39.9869	130/C	0.065386	6470
AT5G45630	unknown function	5_18510587	0.000318811	45	42.6174	69/T	39.9869	130/C	0.065386	-2264
AT5G45640	Subtilisin-like serine endopeptidase family protein	5_18510587	0.000318811	45	42.6174	69/T	39.9869	130/C	0.065386	Exon	✔
AT5G45650	subtilase family protein	5_18510587	0.000318811	45	42.6174	69/T	39.9869	130/C	0.065386	2844
AT2G39570	ACT domain-containing protein	2_16518357	0.000321147	46	35.9619	21/G	41.5011	179/A	0.0652096	8159
AT2G39580	CONTAINS InterPro DOMAIN/s: Putative zinc-finger domain (InterPro:IPR019607)	2_16518357	0.000321147	46	35.9619	21/G	41.5011	179/A	0.0652096	1284
AT2G39590	Ribosomal protein S8 family protein	2_16518357	0.000321147	46	35.9619	21/G	41.5011	179/A	0.0652096	Prom	✔
AT2G39620	Pentatricopeptide repeat (PPR) superfamily protein	2_16518357	0.000321147	46	35.9619	21/G	41.5011	179/A	0.0652096	611
AT2G39630	Nucleotide-diphospho-sugar transferases superfamily protein	2_16518357	0.000321147	46	35.9619	21/G	41.5011	179/A	0.0652096	3387
AT2G39640	glycosyl hydrolase family 17 protein	2_16518357	0.000321147	46	35.9619	21/G	41.5011	179/A	0.0652096	6729
AT2G39650	Protein of unknown function (DUF506)	2_16518357	0.000321147	46	35.9619	21/G	41.5011	179/A	0.0652096	9435
AT1G20260	V-ATPASE B SUBUNIT 3 (VAB3)	1_7030354	0.000347218	47	42.5693	88/A	39.5748	111/T	0.0645525	9764
AT1G20270	2-oxoglutarate (2OG) and Fe(II)-dependent oxygenase superfamily protein	1_7030354	0.000347218	47	42.5693	88/A	39.5748	111/T	0.0645525	-5287
AT1G20280	homeobox-leucine zipper protein-related	1_7030354	0.000347218	47	42.5693	88/A	39.5748	111/T	0.0645525	6142
AT1G20290	SWI-SNF-related chromatin binding protein	1_7030354	0.000347218	47	42.5693	88/A	39.5748	111/T	0.0645525	Prom	✔
AT1G20300	Pentatricopeptide repeat (PPR) superfamily protein	1_7030354	0.000347218	47	42.5693	88/A	39.5748	111/T	0.0645525	Exon	✔
AT1G20310	unknown protein	1_7030354	0.000347218	47	42.5693	88/A	39.5748	111/T	0.0645525	Prom	✔
AT1G20320	Haloacid dehalogenase-like hydrolase (HAD) superfamily protein	1_7030354	0.000347218	47	42.5693	88/A	39.5748	111/T	0.0645525	3303	✔
AT1G20330	sterol methyltransferase 2 (SMT2)	1_7030354	0.000347218	47	42.5693	88/A	39.5748	111/T	0.0645525	8334
AT3G27730	ROCK-N-ROLLERS (RCK)	3_10290602	0.000352016	48	44.0944	18/C	40.5409	181/A	0.0648616	-8240
AT3G27740	carbamoyl phosphate synthetase A (CARA)	3_10290602	0.000352016	48	44.0944	18/C	40.5409	181/A	0.0648616	-4736
AT3G27750	FUNCTIONS IN: molecular	3_10290602	0.000352016	48	44.0944	18/C	40.5409	181/A	0.0648616	4728
AT3G27770	unknown protein	3_10290602	0.000352016	48	44.0944	18/C	40.5409	181/A	0.0648616	-827
AT3G27785	myb domain protein 118 (MYB118)	3_10290602	0.000352016	48	44.0944	18/C	40.5409	181/A	0.0648616	Exon	✔
AT1G76700	DNAJ heat shock N-terminal domain-containing protein	1_28791552	0.000355798	49	37.7489	45/A	41.84	155/G	0.0642111	-6304	✔
AT1G76705	calmodulin binding	1_28791552	0.000355798	49	37.7489	45/A	41.84	155/G	0.0642111	4224	✔
AT1G76710	SET domain group 26 (SDG26)	1_28791552	0.000355798	49	37.7489	45/A	41.84	155/G	0.0642111	Intron	✔
AT1G76720	eukaryotic translation initiation factor 2 (eIF-2) family protein	1_28791552	0.000355798	49	37.7489	45/A	41.84	155/G	0.0642111	2592	✔
AT1G76728	unknown protein	1_28791552	0.000355798	49	37.7489	45/A	41.84	155/G	0.0642111	-9081
AT2G33330	plasmodesmata-located protein 3 (PDLP3)	2_14135781	0.000368875	51	44.7526	19/A	40.5171	181/T	0.0638599	-8644
AT2G33340	MOS4-associated complex 3B (MAC3B)	2_14135781	0.000368875	51	44.7526	19/A	40.5171	181/T	0.0638599	-2628
AT2G33350	CCT motif family protein	2_14135781	0.000368875	51	44.7526	19/A	40.5171	181/T	0.0638599	Exon	✔
AT2G33360	Protein of unknown function (DUF3527)	2_14135781	0.000368875	51	44.7526	19/A	40.5171	181/T	0.0638599	-2017
AT2G33370	Ribosomal protein L14p/L23e family protein	2_14135781	0.000368875	51	44.7526	19/A	40.5171	181/T	0.0638599	7773
AT2G33380	RESPONSIVE TO DESSICATION 20 (RD20)	2_14135781	0.000368875	51	44.7526	19/A	40.5171	181/T	0.0638599	9050
AT5G03260	laccase 11 (LAC11)	5_787818	0.000370698	52	42.1274	84/G	40.0448	116/T	0.0638119	-6394
AT5G03270	lysine decarboxylase family protein	5_787818	0.000370698	52	42.1274	84/G	40.0448	116/T	0.0638119	3821
AT5G03280	ETHYLENE INSENSITIVE 2 (EIN2)	5_787818	0.000370698	52	42.1274	84/G	40.0448	116/T	0.0638119	Intron	✔
AT5G03290	isocitrate dehydrogenase V (IDH-V)	5_787818	0.000370698	52	42.1274	84/G	40.0448	116/T	0.0638119	-4156
AT5G03300	adenosine kinase 2 (ADK2)	5_787818	0.000370698	52	42.1274	84/G	40.0448	116/T	0.0638119	-6624
AT3G46910	Cullin family protein	3_17284906	0.000400479	53	42.808	50/G	40.29	150/A	0.0630607	5254
AT3G46920	Protein kinase superfamily protein with octicosapeptide/Phox/Bem1p domain	3_17284906	0.000400479	53	42.808	50/G	40.29	150/A	0.0630607	Prom	✔
AT3G46930	Protein kinase superfamily protein	3_17284906	0.000400479	53	42.808	50/G	40.29	150/A	0.0630607	Prom	✔
AT3G46940	DUTP-PYROPHOSPHATASE-LIKE 1 (DUT1)	3_17284906	0.000400479	53	42.808	50/G	40.29	150/A	0.0630607	3288
AT3G46950	Mitochondrial transcription termination factor family protein	3_17284906	0.000400479	53	42.808	50/G	40.29	150/A	0.0630607	-2463
AT3G46960	RNA helicase	3_17284906	0.000400479	53	42.808	50/G	40.29	150/A	0.0630607	5967
AT1G46696	unknown function	1_17274707	0.000405868	54	37.4917	24/C	41.3869	176/T	0.0629308	-8524
AT1G46768	related to AP2 1 (RAP2.1)	1_17274707	0.000405868	54	37.4917	24/C	41.3869	176/T	0.0629308	-6171
AT1G46840	F-box family protein	1_17274707	0.000405868	54	37.4917	24/C	41.3869	176/T	0.0629308	3001
AT1G46912	F-box associated ubiquitination effector family protein	1_17274707	0.000405868	54	37.4917	24/C	41.3869	176/T	0.0629308	1078	✔
AT1G46984	F-box family protein	1_17274707	0.000405868	54	37.4917	24/C	41.3869	176/T	0.0629308	Prom	✔
AT1G47056	VIER F-box proteine 1 (VFB1)	1_17274707	0.000405868	54	37.4917	24/C	41.3869	176/T	0.0629308	1396
AT1G47128	responsive to dehydration 21 (RD21)	1_17274707	0.000405868	54	37.4917	24/C	41.3869	176/T	0.0629308	8118
AT1G46696	unknown function	1_17274729	0.000405868	55	37.4917	24/A	41.3869	176/G	0.0629308	-8546
AT1G46768	related to AP2 1 (RAP2.1)	1_17274729	0.000405868	55	37.4917	24/A	41.3869	176/G	0.0629308	-6193
AT1G46840	F-box family protein	1_17274729	0.000405868	55	37.4917	24/A	41.3869	176/G	0.0629308	3023
AT1G46912	F-box associated ubiquitination effector family protein	1_17274729	0.000405868	55	37.4917	24/A	41.3869	176/G	0.0629308	1100	✔
AT1G46984	F-box family protein	1_17274729	0.000405868	55	37.4917	24/A	41.3869	176/G	0.0629308	Exon	✔
AT1G47056	VIER F-box proteine 1 (VFB1)	1_17274729	0.000405868	55	37.4917	24/A	41.3869	176/G	0.0629308	1374
AT1G47128	responsive to dehydration 21 (RD21)	1_17274729	0.000405868	55	37.4917	24/A	41.3869	176/G	0.0629308	8096
AT3G27070	translocase outer membrane 20-1 (TOM20-1)	3_9993837	0.000409591	56	39.6818	22/T	41.0725	178/C	0.0628422	-7093
AT3G27080	translocase of outer membrane 20 kDa subunit 3 (TOM20-3)	3_9993837	0.000409591	56	39.6818	22/T	41.0725	178/C	0.0628422	-5208
AT3G27090	DCD (Development and Cell Death) domain protein	3_9993837	0.000409591	56	39.6818	22/T	41.0725	178/C	0.0628422	2011
AT3G27100	ENY2	3_9993837	0.000409591	56	39.6818	22/T	41.0725	178/C	0.0628422	708	✔
AT3G27110	Peptidase family M48 family protein	3_9993837	0.000409591	56	39.6818	22/T	41.0725	178/C	0.0628422	-2058
AT3G27120	P-loop containing nucleoside triphosphate hydrolases superfamily protein	3_9993837	0.000409591	56	39.6818	22/T	41.0725	178/C	0.0628422	5857
AT3G27130	P-loop containing nucleoside triphosphate hydrolases superfamily protein	3_9993837	0.000409591	56	39.6818	22/T	41.0725	178/C	0.0628422	8822
AT1G30280	Chaperone DnaJ-domain superfamily protein	1_10672003	0.000422851	57	38.1375	32/C	41.4494	168/T	0.0625329	-5335
AT1G30290	Tetratricopeptide repeat (TPR)-like superfamily protein	1_10672003	0.000422851	57	38.1375	32/C	41.4494	168/T	0.0625329	Exon	✔
AT1G30300	Metallo-hydrolase/oxidoreductase superfamily protein	1_10672003	0.000422851	57	38.1375	32/C	41.4494	168/T	0.0625329	Prom	✔
AT1G30320	Remorin family protein	1_10672003	0.000422851	57	38.1375	32/C	41.4494	168/T	0.0625329	-6243
AT1G61850	phospholipases	1_22869193	0.000429783	58	39.07	80/G	42.1525	120/A	0.0623751	6834
AT1G61860	Protein kinase superfamily protein	1_22869193	0.000429783	58	39.07	80/G	42.1525	120/A	0.0623751	-2574
AT1G61870	pentatricopeptide repeat 336 (PPR336)	1_22869193	0.000429783	58	39.07	80/G	42.1525	120/A	0.0623751	-578
AT1G61890	MATE efflux family protein	1_22869193	0.000429783	58	39.07	80/G	42.1525	120/A	0.0623751	Intron	✔
AT5G59480	Haloacid dehalogenase-like hydrolase (HAD) superfamily protein	5_23991241	0.000439622	59	36.6	30/C	41.7396	169/T	0.0628177	-7651
AT5G59490	Haloacid dehalogenase-like hydrolase (HAD) superfamily protein	5_23991241	0.000439622	59	36.6	30/C	41.7396	169/T	0.0628177	-4624
AT5G59500	protein C-terminal S-isoprenylcysteine carboxyl O-methyltransferases	5_23991241	0.000439622	59	36.6	30/C	41.7396	169/T	0.0628177	3860
AT5G59505	MIR172E	5_23991241	0.000439622	59	36.6	30/C	41.7396	169/T	0.0628177	2645
AT5G59510	ROTUNDIFOLIA like 5 (RTFL5)	5_23991241	0.000439622	59	36.6	30/C	41.7396	169/T	0.0628177	545
AT5G59520	ZRT/IRT-like protein 2 (ZIP2)	5_23991241	0.000439622	59	36.6	30/C	41.7396	169/T	0.0628177	12	✔
AT5G59530	2-oxoglutarate (2OG) and Fe(II)-dependent oxygenase superfamily protein	5_23991241	0.000439622	59	36.6	30/C	41.7396	169/T	0.0628177	2929
AT5G59540	2-oxoglutarate (2OG) and Fe(II)-dependent oxygenase superfamily protein	5_23991241	0.000439622	59	36.6	30/C	41.7396	169/T	0.0628177	4832
AT5G59550	zinc finger (C3HC4-type RING finger) family protein	5_23991241	0.000439622	59	36.6	30/C	41.7396	169/T	0.0628177	7018
AT5G59560	SENSITIVITY TO RED LIGHT REDUCED 1 (SRR1)	5_23991241	0.000439622	59	36.6	30/C	41.7396	169/T	0.0628177	9315
AT4G21060	Galactosyltransferase family protein	4_11252619	0.000441355	60	35.925	20/C	41.4744	180/T	0.0621174	7570
AT4G21065	Tetratricopeptide repeat (TPR)-like superfamily protein	4_11252619	0.000441355	60	35.925	20/C	41.4744	180/T	0.0621174	4812
AT4G21070	breast cancer susceptibility1 (BRCA1)	4_11252619	0.000441355	60	35.925	20/C	41.4744	180/T	0.0621174	Exon	✔
AT4G21080	Dof-type zinc finger domain-containing protein	4_11252619	0.000441355	60	35.925	20/C	41.4744	180/T	0.0621174	1983
AT4G21090	MITOCHONDRIAL FERREDOXIN 2 (MFDX2)	4_11252619	0.000441355	60	35.925	20/C	41.4744	180/T	0.0621174	3840
AT4G21100	damaged DNA binding protein 1B (DDB1B)	4_11252619	0.000441355	60	35.925	20/C	41.4744	180/T	0.0621174	6142
AT1G62520	unknown protein	1_23151790	0.000446803	61	44.0479	48/T	39.9316	152/C	0.0619984	6281
AT1G62530	Plant protein of unknown function (DUF863)	1_23151790	0.000446803	61	44.0479	48/T	39.9316	152/C	0.0619984	-1423	✔
AT1G62540	flavin-monooxygenase glucosinolate S-oxygenase 2 (FMO GS-OX2)	1_23151790	0.000446803	61	44.0479	48/T	39.9316	152/C	0.0619984	Prom	✔
AT1G62560	flavin-monooxygenase glucosinolate S-oxygenase 3 (FMO GS-OX3)	1_23151790	0.000446803	61	44.0479	48/T	39.9316	152/C	0.0619984	-6033
AT1G60750	NAD(P)-linked oxidoreductase superfamily protein	1_22374851	0.000448932	62	38.1134	67/A	42.3331	133/G	0.0619523	-8997
AT1G60760	Plant invertase/pectin methylesterase inhibitor superfamily protein	1_22374851	0.000448932	62	38.1134	67/A	42.3331	133/G	0.0619523	8528
AT1G60770	Tetratricopeptide repeat (TPR)-like superfamily protein	1_22374851	0.000448932	62	38.1134	67/A	42.3331	133/G	0.0619523	-4137
AT1G60780	HAPLESS 13 (HAP13)	1_22374851	0.000448932	62	38.1134	67/A	42.3331	133/G	0.0619523	-692
AT1G60783	unknown protein	1_22374851	0.000448932	62	38.1134	67/A	42.3331	133/G	0.0619523	Prom	✔
AT1G60790	TRICHOME BIREFRINGENCE-LIKE 2 (TBL2)	1_22374851	0.000448932	62	38.1134	67/A	42.3331	133/G	0.0619523	5187
AT1G60800	NSP-interacting kinase 3 (NIK3)	1_22374851	0.000448932	62	38.1134	67/A	42.3331	133/G	0.0619523	8602
AT5G43440	2-oxoglutarate (2OG) and Fe(II)-dependent oxygenase superfamily protein	5_17467818	0.000458909	64	38.7529	51/A	41.6558	147/G	0.0618203	-9161
AT5G43450	2-oxoglutarate (2OG) and Fe(II)-dependent oxygenase superfamily protein	5_17467818	0.000458909	64	38.7529	51/A	41.6558	147/G	0.0618203	-7021
AT5G43460	HR-like lesion-inducing protein-related	5_17467818	0.000458909	64	38.7529	51/A	41.6558	147/G	0.0618203	6067
AT5G43470	RECOGNITION OF PERONOSPORA PARASITICA 8 (RPP8)	5_17467818	0.000458909	64	38.7529	51/A	41.6558	147/G	0.0618203	Prom	✔
AT5G43480	unknown protein	5_17467818	0.000458909	64	38.7529	51/A	41.6558	147/G	0.0618203	Prom	✔
AT5G43490	unknown protein	5_17467818	0.000458909	64	38.7529	51/A	41.6558	147/G	0.0618203	653	✔
AT5G43500	actin-related protein 9 (ARP9)	5_17467818	0.000458909	64	38.7529	51/A	41.6558	147/G	0.0618203	Prom	✔
AT5G43510	Putative membrane lipoprotein	5_17467818	0.000458909	64	38.7529	51/A	41.6558	147/G	0.0618203	-4293
AT5G43513	Putative membrane lipoprotein	5_17467818	0.000458909	64	38.7529	51/A	41.6558	147/G	0.0618203	-8181
AT1G30270	CBL-interacting protein kinase 23 (CIPK23)	1_10667980	0.000461839	65	37.8968	31/T	41.474	169/G	0.0616776	9083
AT1G30280	Chaperone DnaJ-domain superfamily protein	1_10667980	0.000461839	65	37.8968	31/T	41.474	169/G	0.0616776	-1312	✔
AT1G30290	Tetratricopeptide repeat (TPR)-like superfamily protein	1_10667980	0.000461839	65	37.8968	31/T	41.474	169/G	0.0616776	2340
AT1G30300	Metallo-hydrolase/oxidoreductase superfamily protein	1_10667980	0.000461839	65	37.8968	31/T	41.474	169/G	0.0616776	-3018
AT2G25520	Drug/metabolite transporter superfamily protein	2_10870091	0.000463303	66	38.7698	86/T	42.5412	114/G	0.061647	7734
AT2G25530	AFG1-like ATPase family protein	2_10870091	0.000463303	66	38.7698	86/T	42.5412	114/G	0.061647	3334
AT2G25540	cellulose synthase 10 (CESA10)	2_10870091	0.000463303	66	38.7698	86/T	42.5412	114/G	0.061647	Intron	✔
AT2G25560	DNAJ heat shock N-terminal domain-containing protein	2_10870091	0.000463303	66	38.7698	86/T	42.5412	114/G	0.061647	-8580
AT2G37940	Arabidopsis Inositol phosphorylceramide synthase 2 (AtIPCS2)	2_15888200	0.000481029	68	46.3333	18/G	40.3867	180/C	0.0616211	8545
AT2G37950	RING/FYVE/PHD zinc finger superfamily protein	2_15888200	0.000481029	68	46.3333	18/G	40.3867	180/C	0.0616211	-2221	✔
AT2G37960	unknown protein	2_15888200	0.000481029	68	46.3333	18/G	40.3867	180/C	0.0616211	Exon	✔
AT2G37970	SOUL-1	2_15888200	0.000481029	68	46.3333	18/G	40.3867	180/C	0.0616211	-772
AT2G37975	Yos1-like protein	2_15888200	0.000481029	68	46.3333	18/G	40.3867	180/C	0.0616211	3535
AT2G37980	O-fucosyltransferase family protein	2_15888200	0.000481029	68	46.3333	18/G	40.3867	180/C	0.0616211	5857
AT5G63630	P-loop containing nucleoside triphosphate hydrolases superfamily protein	5_25483283	0.000502464	69	43.0279	61/T	39.9942	139/C	0.0608615	-4772
AT5G63640	ENTH/VHS/GAT family protein	5_25483283	0.000502464	69	43.0279	61/T	39.9942	139/C	0.0608615	1794
AT5G63650	SNF1-related protein kinase 2.5 (SNRK2.5)	5_25483283	0.000502464	69	43.0279	61/T	39.9942	139/C	0.0608615	Intron	✔
AT5G63660	PDF2.5	5_25483283	0.000502464	69	43.0279	61/T	39.9942	139/C	0.0608615	-409	✔
AT5G63670	SPT4 homolog 2 (SPT42)	5_25483283	0.000502464	69	43.0279	61/T	39.9942	139/C	0.0608615	-2644
AT5G63680	Pyruvate kinase family protein	5_25483283	0.000502464	69	43.0279	61/T	39.9942	139/C	0.0608615	-4790
AT5G63690	Nucleic acid-binding	5_25483283	0.000502464	69	43.0279	61/T	39.9942	139/C	0.0608615	9581
AT4G17615	calcineurin B-like protein 1 (CBL1)	4_9828098	0.00050422	70	39.3957	94/C	42.2708	106/T	0.0608277	8786
AT4G17616	Pentatricopeptide repeat (PPR) superfamily protein	4_9828098	0.00050422	70	39.3957	94/C	42.2708	106/T	0.0608277	6414
AT4G17620	glycine-rich protein	4_9828098	0.00050422	70	39.3957	94/C	42.2708	106/T	0.0608277	3069
AT4G17640	casein kinase II beta chain 2 (CKB2)	4_9828098	0.00050422	70	39.3957	94/C	42.2708	106/T	0.0608277	741	✔
AT4G17650	Polyketide cyclase / dehydrase and lipid transport protein	4_9828098	0.00050422	70	39.3957	94/C	42.2708	106/T	0.0608277	Intron	✔
AT4G17660	Protein kinase superfamily protein	4_9828098	0.00050422	70	39.3957	94/C	42.2708	106/T	0.0608277	-1261
AT4G17670	Protein of unknown function (DUF581)	4_9828098	0.00050422	70	39.3957	94/C	42.2708	106/T	0.0608277	5563
AT3G30720	QUA-QUINE STARCH (QQS)	3_12344776	0.000506438	71	39.5099	91/G	42.2698	106/C	0.0622252	-2271	✔
AT3G30725	glutamine dumper 6 (GDU6)	3_12344776	0.000506438	71	39.5099	91/G	42.2698	106/C	0.0622252	-5733
AT3G28750	unknown protein	3_10803995	0.000507703	72	42.7532	94/T	39.2934	106/C	0.0607611	-9151
AT3G28760	FUNCTIONS IN: molecular	3_10803995	0.000507703	72	42.7532	94/T	39.2934	106/C	0.0607611	-6683
AT3G28770	Protein of unknown function (DUF1216)	3_10803995	0.000507703	72	42.7532	94/T	39.2934	106/C	0.0607611	758	✔
AT3G28780	Protein of unknown function (DUF1216)	3_10803995	0.000507703	72	42.7532	94/T	39.2934	106/C	0.0607611	1916
AT3G28790	Protein of unknown function (DUF1216)	3_10803995	0.000507703	72	42.7532	94/T	39.2934	106/C	0.0607611	9336
AT1G30290	Tetratricopeptide repeat (TPR)-like superfamily protein	1_10677540	0.000509182	73	36.9	25/C	41.411	173/T	0.0613495	-2800
AT1G30300	Metallo-hydrolase/oxidoreductase superfamily protein	1_10677540	0.000509182	73	36.9	25/C	41.411	173/T	0.0613495	2172
AT1G30320	Remorin family protein	1_10677540	0.000509182	73	36.9	25/C	41.411	173/T	0.0613495	-706	✔
AT1G30330	auxin response factor 6 (ARF6)	1_10677540	0.000509182	73	36.9	25/C	41.411	173/T	0.0613495	8282
AT3G44830	Lecithin:cholesterol acyltransferase family protein	3_16376614	0.00051071	74	39.2013	76/A	41.614	114/T	0.0635089	4258
AT3G44840	S-adenosyl-L-methionine-dependent methyltransferases superfamily protein	3_16376614	0.00051071	74	39.2013	76/A	41.614	114/T	0.0635089	-855
AT3G44850	Protein kinase superfamily protein	3_16376614	0.00051071	74	39.2013	76/A	41.614	114/T	0.0635089	Intron	✔
AT3G44860	farnesoic acid carboxyl-O-methyltransferase (FAMT)	3_16376614	0.00051071	74	39.2013	76/A	41.614	114/T	0.0635089	-1019
AT3G44870	S-adenosyl-L-methionine-dependent methyltransferases superfamily protein	3_16376614	0.00051071	74	39.2013	76/A	41.614	114/T	0.0635089	-3605
AT3G44880	ACCELERATED CELL DEATH 1 (ACD1)	3_16376614	0.00051071	74	39.2013	76/A	41.614	114/T	0.0635089	-4981
AT3G44890	ribosomal protein L9 (RPL9)	3_16376614	0.00051071	74	39.2013	76/A	41.614	114/T	0.0635089	-7820
AT5G08695	RNA-binding (RRM/RBD/RNP motifs) family protein	5_2843910	0.00052266	75	45.7968	31/C	40.0249	169/A	0.0604804	9215
AT5G08710	Regulator of chromosome condensation (RCC1) family protein	5_2843910	0.00052266	75	45.7968	31/C	40.0249	169/A	0.0604804	-3820	✔
AT5G08712	MIR166	5_2843910	0.00052266	75	45.7968	31/C	40.0249	169/A	0.0604804	5153	✔
AT5G08717	MIR166	5_2843910	0.00052266	75	45.7968	31/C	40.0249	169/A	0.0604804	3182	✔
AT5G08720	HIGH CHLOROPHYLL FLUORESCENCE 145 (HCF145)	5_2843910	0.00052266	75	45.7968	31/C	40.0249	169/A	0.0604804	Intron	✔
AT5G08730	ARIADNE 16 (ARI16)	5_2843910	0.00052266	75	45.7968	31/C	40.0249	169/A	0.0604804	1914
AT5G08740	NAD(P)H dehydrogenase C1 (NDC1)	5_2843910	0.00052266	75	45.7968	31/C	40.0249	169/A	0.0604804	4596
AT5G08750	RING/FYVE/PHD zinc finger superfamily protein	5_2843910	0.00052266	75	45.7968	31/C	40.0249	169/A	0.0604804	-6069
AT5G08760	unknown protein	5_2843910	0.00052266	75	45.7968	31/C	40.0249	169/A	0.0604804	-9030
AT5G10030	TGACG motif-binding factor 4 (TGA4)	5_3152652	0.000525882	76	40.0205	78/T	41.4943	122/C	0.060421	-6383
AT5G10040	unknown protein	5_3152652	0.000525882	76	40.0205	78/T	41.4943	122/C	0.060421	8495
AT5G10050	NAD(P)-binding Rossmann-fold superfamily protein	5_3152652	0.000525882	76	40.0205	78/T	41.4943	122/C	0.060421	6922
AT5G10060	ENTH/VHS family protein	5_3152652	0.000525882	76	40.0205	78/T	41.4943	122/C	0.060421	-2273
AT5G10070	RNase L inhibitor protein-related	5_3152652	0.000525882	76	40.0205	78/T	41.4943	122/C	0.060421	-218	✔
AT5G10080	Eukaryotic aspartyl protease family protein	5_3152652	0.000525882	76	40.0205	78/T	41.4943	122/C	0.060421	Exon	✔
AT5G10090	Tetratricopeptide repeat (TPR)-like superfamily protein	5_3152652	0.000525882	76	40.0205	78/T	41.4943	122/C	0.060421	1070
AT5G10100	Haloacid dehalogenase-like hydrolase (HAD) superfamily protein	5_3152652	0.000525882	76	40.0205	78/T	41.4943	122/C	0.060421	-3328
AT1G30280	Chaperone DnaJ-domain superfamily protein	1_10675689	0.000529759	77	36.7812	16/T	41.3083	180/C	0.0626774	-9021
AT1G30290	Tetratricopeptide repeat (TPR)-like superfamily protein	1_10675689	0.000529759	77	36.7812	16/T	41.3083	180/C	0.0626774	-949
AT1G30300	Metallo-hydrolase/oxidoreductase superfamily protein	1_10675689	0.000529759	77	36.7812	16/T	41.3083	180/C	0.0626774	321	✔
AT1G30320	Remorin family protein	1_10675689	0.000529759	77	36.7812	16/T	41.3083	180/C	0.0626774	-2557
AT4G22660	CONTAINS InterPro DOMAIN/s: F-box domain	4_11926809	0.000551502	78	36.52	15/A	41.256	184/G	0.0600572	-8638
AT4G22666	Bifunctional inhibitor/lipid-transfer protein/seed storage 2S albumin superfamily protein	4_11926809	0.000551502	78	36.52	15/A	41.256	184/G	0.0600572	8930
AT4G22670	HSP70-interacting protein 1 (HIP1)	4_11926809	0.000551502	78	36.52	15/A	41.256	184/G	0.0600572	5899
AT4G22680	myb domain protein 85 (MYB85)	4_11926809	0.000551502	78	36.52	15/A	41.256	184/G	0.0600572	-593
AT4G22690	cytochrome P450_family 706	4_11926809	0.000551502	78	36.52	15/A	41.256	184/G	0.0600572	-550	✔
AT4G22700	LOB domain-containing protein 32 (LBD32)	4_11926809	0.000551502	78	36.52	15/A	41.256	184/G	0.0600572	-4488
AT4G22710	cytochrome P450_family 706	4_11926809	0.000551502	78	36.52	15/A	41.256	184/G	0.0600572	-6160
AT4G22720	Actin-like ATPase superfamily protein	4_11926809	0.000551502	78	36.52	15/A	41.256	184/G	0.0600572	-8133
AT3G25500	formin homology 1 (AFH1)	3_9263196	0.000556964	80	42.1179	95/G	39.8352	105/A	0.0598663	-6194
AT3G25510	disease resistance protein (TIR-NBS-LRR class)	3_9263196	0.000556964	80	42.1179	95/G	39.8352	105/A	0.0598663	Exon	✔
AT3G25520	ribosomal protein L5 (ATL5)	3_9263196	0.000556964	80	42.1179	95/G	39.8352	105/A	0.0598663	6097
AT3G25530	glyoxylate reductase 1 (GLYR1)	3_9263196	0.000556964	80	42.1179	95/G	39.8352	105/A	0.0598663	8604
AT3G25540	LAG1 and CLN8 (TLC) lipid-sensing domain containing protein	3_9263196	0.000556964	80	42.1179	95/G	39.8352	105/A	0.0598663	-9139
AT2G05786	unknown protein	2_2196487	0.00057004	81	45.0067	15/G	40.5881	185/A	0.0596424	1784
AT2G05790	O-Glycosyl hydrolases family 17 protein	2_2196487	0.00057004	81	45.0067	15/G	40.5881	185/A	0.0596424	-732	✔
AT1G60690	NAD(P)-linked oxidoreductase superfamily protein	1_22361861	0.000578271	82	37.7136	44/A	41.9361	155/G	0.0612406	-8193
AT1G60700	SMAD/FHA domain-containing protein	1_22361861	0.000578271	82	37.7136	44/A	41.9361	155/G	0.0612406	-5389
AT1G60710	ATB2	1_22361861	0.000578271	82	37.7136	44/A	41.9361	155/G	0.0612406	-3100
AT1G60720	RNA-directed DNA polymerase (reverse transcriptase)-related family protein	1_22361861	0.000578271	82	37.7136	44/A	41.9361	155/G	0.0612406	3920
AT1G60730	NAD(P)-linked oxidoreductase superfamily protein	1_22361861	0.000578271	82	37.7136	44/A	41.9361	155/G	0.0612406	Prom	✔
AT1G60740	Thioredoxin superfamily protein	1_22361861	0.000578271	82	37.7136	44/A	41.9361	155/G	0.0612406	Exon	✔
AT1G60750	NAD(P)-linked oxidoreductase superfamily protein	1_22361861	0.000578271	82	37.7136	44/A	41.9361	155/G	0.0612406	432
AT1G60760	Plant invertase/pectin methylesterase inhibitor superfamily protein	1_22361861	0.000578271	82	37.7136	44/A	41.9361	155/G	0.0612406	-1971
AT1G60770	Tetratricopeptide repeat (TPR)-like superfamily protein	1_22361861	0.000578271	82	37.7136	44/A	41.9361	155/G	0.0612406	4840
AT1G60780	HAPLESS 13 (HAP13)	1_22361861	0.000578271	82	37.7136	44/A	41.9361	155/G	0.0612406	7092
AT3G29570	unknown protein	3_11375043	0.000593597	83	45.2786	28/C	40.2345	165/G	0.0605994	-8254
AT3G29575	ABI five binding protein 3 (AFP3)	3_11375043	0.000593597	83	45.2786	28/C	40.2345	165/G	0.0605994	7171	✔
AT3G25570	Adenosylmethionine decarboxylase family protein	3_9301038	0.000599065	84	45.6633	30/T	40.0886	166/G	0.0603501	-9700
AT3G25572	conserved peptide upstream open reading frame 11 (CPuORF11)	3_9301038	0.000599065	84	45.6633	30/T	40.0886	166/G	0.0603501	-9700
AT3G25577	unknown protein	3_9301038	0.000599065	84	45.6633	30/T	40.0886	166/G	0.0603501	8946
AT3G25580	Thioredoxin superfamily protein	3_9301038	0.000599065	84	45.6633	30/T	40.0886	166/G	0.0603501	6691
AT3G25585	aminoalcoholphosphotransferase (AAPT2)	3_9301038	0.000599065	84	45.6633	30/T	40.0886	166/G	0.0603501	2292
AT3G25590	unknown protein	3_9301038	0.000599065	84	45.6633	30/T	40.0886	166/G	0.0603501	Prom	✔
AT3G25597	unknown protein	3_9301038	0.000599065	84	45.6633	30/T	40.0886	166/G	0.0603501	-2884
AT3G25600	Calcium-binding EF-hand family protein	3_9301038	0.000599065	84	45.6633	30/T	40.0886	166/G	0.0603501	-4216
AT3G25610	ATPase E1-E2 type family protein / haloacid dehalogenase-like hydrolase family protein	3_9301038	0.000599065	84	45.6633	30/T	40.0886	166/G	0.0603501	7904
AT4G32670	RING/FYVE/PHD zinc finger superfamily protein	4_15772964	0.000599946	85	38.8116	43/G	41.4968	157/A	0.0591492	-8039	✔
AT4G32680	transmembrane protein	4_15772964	0.000599946	85	38.8116	43/G	41.4968	157/A	0.0591492	-5850	✔
AT4G32690	hemoglobin 3 (GLB3)	4_15772964	0.000599946	85	38.8116	43/G	41.4968	157/A	0.0591492	5858	✔
AT4G32700	helicases	4_15772964	0.000599946	85	38.8116	43/G	41.4968	157/A	0.0591492	Prom	✔
AT4G32710	Protein kinase superfamily protein	4_15772964	0.000599946	85	38.8116	43/G	41.4968	157/A	0.0591492	-6081
AT4G32714	SCR-like 25 (SCRL25)	4_15772964	0.000599946	85	38.8116	43/G	41.4968	157/A	0.0591492	-9710
AT2G37950	RING/FYVE/PHD zinc finger superfamily protein	2_15891608	0.000608501	86	40.2844	90/G	41.4391	110/T	0.0590127	-5629
AT2G37960	unknown protein	2_15891608	0.000608501	86	40.2844	90/G	41.4391	110/T	0.0590127	-388	✔
AT2G37970	SOUL-1	2_15891608	0.000608501	86	40.2844	90/G	41.4391	110/T	0.0590127	Exon	✔
AT2G37975	Yos1-like protein	2_15891608	0.000608501	86	40.2844	90/G	41.4391	110/T	0.0590127	127	✔
AT2G37980	O-fucosyltransferase family protein	2_15891608	0.000608501	86	40.2844	90/G	41.4391	110/T	0.0590127	2449
AT2G37990	ribosome biogenesis regulatory protein (RRS1) family protein	2_15891608	0.000608501	86	40.2844	90/G	41.4391	110/T	0.0590127	-7027
AT2G37950	RING/FYVE/PHD zinc finger superfamily protein	2_15891844	0.000608501	87	40.2844	90/A	41.4391	110/T	0.0590127	-5865
AT2G37960	unknown protein	2_15891844	0.000608501	87	40.2844	90/A	41.4391	110/T	0.0590127	-624	✔
AT2G37970	SOUL-1	2_15891844	0.000608501	87	40.2844	90/A	41.4391	110/T	0.0590127	1	✔
AT2G37975	Yos1-like protein	2_15891844	0.000608501	87	40.2844	90/A	41.4391	110/T	0.0590127	Exon	✔
AT2G37980	O-fucosyltransferase family protein	2_15891844	0.000608501	87	40.2844	90/A	41.4391	110/T	0.0590127	2213
AT2G37990	ribosome biogenesis regulatory protein (RRS1) family protein	2_15891844	0.000608501	87	40.2844	90/A	41.4391	110/T	0.0590127	-6791
AT3G30580	unknown protein	3_12176640	0.000608594	88	42.9915	82/T	39.4838	117/C	0.0592378	-6487	✔
AT5G52580	RabGAP/TBC domain-containing protein	5_21350957	0.000616523	89	44.5067	45/T	39.8781	155/A	0.0588865	7972
AT5G52600	myb domain protein 82 (MYB82)	5_21350957	0.000616523	89	44.5067	45/T	39.8781	155/A	0.0588865	-4989
AT5G52605	Defensin-like (DEFL) family protein	5_21350957	0.000616523	89	44.5067	45/T	39.8781	155/A	0.0588865	-3357
AT5G52610	F-box and associated interaction domains-containing protein	5_21350957	0.000616523	89	44.5067	45/T	39.8781	155/A	0.0588865	-1479
AT5G52620	F-box associated ubiquitination effector family protein	5_21350957	0.000616523	89	44.5067	45/T	39.8781	155/A	0.0588865	Prom	✔
AT5G52630	mitochondrial RNAediting factor 1 (MEF1)	5_21350957	0.000616523	89	44.5067	45/T	39.8781	155/A	0.0588865	Exon	✔
AT5G52640	heat shock protein 90.1 (HSP90.1)	5_21350957	0.000616523	89	44.5067	45/T	39.8781	155/A	0.0588865	Prom	✔
AT5G52650	RNA binding Plectin/S10 domain-containing protein	5_21350957	0.000616523	89	44.5067	45/T	39.8781	155/A	0.0588865	4598
AT5G52660	Homeodomain-like superfamily protein	5_21350957	0.000616523	89	44.5067	45/T	39.8781	155/A	0.0588865	8102
AT3G61182	low-molecular-weight cysteine-rich 54 (LCR54)	3_22658178	0.000621471	90	35.89	30/C	41.8071	170/G	0.0588095	-8010
AT3G61190	BON association protein 1 (BAP1)	3_22658178	0.000621471	90	35.89	30/C	41.8071	170/G	0.0588095	-4690
AT3G61200	Thioesterase superfamily protein	3_22658178	0.000621471	90	35.89	30/C	41.8071	170/G	0.0588095	Exon	✔
AT3G61210	S-adenosyl-L-methionine-dependent methyltransferases superfamily protein	3_22658178	0.000621471	90	35.89	30/C	41.8071	170/G	0.0588095	500	✔
AT3G61220	NAD(P)-binding Rossmann-fold superfamily protein	3_22658178	0.000621471	90	35.89	30/C	41.8071	170/G	0.0588095	-2775
AT3G61230	GATA type zinc finger transcription factor family protein	3_22658178	0.000621471	90	35.89	30/C	41.8071	170/G	0.0588095	6247
AT3G61240	DEA(D/H)-box RNA helicase family protein	3_22658178	0.000621471	90	35.89	30/C	41.8071	170/G	0.0588095	-6005
AT1G76670	Nucleotide-sugar transporter family protein	1_28784398	0.0006247	91	37.9244	45/A	41.8279	154/C	0.0589507	-7497	✔
AT1G76680	12-oxophytodienoate reductase 1 (OPR1)	1_28784398	0.0006247	91	37.9244	45/A	41.8279	154/C	0.0589507	5931	✔
AT1G76690	12-oxophytodienoate reductase 2 (OPR2)	1_28784398	0.0006247	91	37.9244	45/A	41.8279	154/C	0.0589507	3915	✔
AT1G76700	DNAJ heat shock N-terminal domain-containing protein	1_28784398	0.0006247	91	37.9244	45/A	41.8279	154/C	0.0589507	Prom	✔
AT1G76705	calmodulin binding	1_28784398	0.0006247	91	37.9244	45/A	41.8279	154/C	0.0589507	-52	✔
AT1G76710	SET domain group 26 (SDG26)	1_28784398	0.0006247	91	37.9244	45/A	41.8279	154/C	0.0589507	5331	✔
AT1G76720	eukaryotic translation initiation factor 2 (eIF-2) family protein	1_28784398	0.0006247	91	37.9244	45/A	41.8279	154/C	0.0589507	9746	✔
AT1G70750	unknown function	1_26688642	0.000628259	92	38.6274	73/A	42.237	127/T	0.0587049	-3438
AT1G70760	CHLORORESPIRATORY REDUCTION 23 (CRR23)	1_26688642	0.000628259	92	38.6274	73/A	42.237	127/T	0.0587049	258	✔
AT1G70770	unknown function	1_26688642	0.000628259	92	38.6274	73/A	42.237	127/T	0.0587049	Exon	✔
AT1G70780	unknown protein	1_26688642	0.000628259	92	38.6274	73/A	42.237	127/T	0.0587049	6524
AT1G70782	conserved peptide upstream open reading frame 28 (CPuORF28)	1_26688642	0.000628259	92	38.6274	73/A	42.237	127/T	0.0587049	6524
AT1G70790	Calcium-dependent lipid-binding (CaLB domain) family protein	1_26688642	0.000628259	92	38.6274	73/A	42.237	127/T	0.0587049	-9770
AT1G47530	MATE efflux family protein	1_17454051	0.000657808	94	37.8333	51/A	41.9758	149/T	0.0582624	Intron	✔
AT1G47540	Scorpion toxin-like knottin superfamily protein	1_17454051	0.000657808	94	37.8333	51/A	41.9758	149/T	0.0582624	1482
AT1G47550	exocyst complex component sec3A (SEC3A)	1_17454051	0.000657808	94	37.8333	51/A	41.9758	149/T	0.0582624	-1071
AT1G01550	BYPASS 1 (BPS1)	1_208903	0.000659709	95	39.0316	98/G	42.7333	102/C	0.0582346	7128
AT1G01560	MAP kinase 11 (MPK11)	1_208903	0.000659709	95	39.0316	98/G	42.7333	102/C	0.0582346	4568
AT1G01570	FUNCTIONS IN: transferase activity	1_208903	0.000659709	95	39.0316	98/G	42.7333	102/C	0.0582346	1468
AT1G01580	ferric reduction oxidase 2 (FRO2)	1_208903	0.000659709	95	39.0316	98/G	42.7333	102/C	0.0582346	Prom	✔
AT1G01590	ferric reduction oxidase 1 (FRO1)	1_208903	0.000659709	95	39.0316	98/G	42.7333	102/C	0.0582346	-3326
AT1G01600	cytochrome P450_family 86	1_208903	0.000659709	95	39.0316	98/G	42.7333	102/C	0.0582346	-8091
AT5G51750	subtilase 1.3 (SBT1.3)	5_21031544	0.000664986	97	37.7024	41/T	41.7491	159/A	0.058158	8763
AT5G51760	ABA-hypersensitive germination 1 (AHG1)	5_21031544	0.000664986	97	37.7024	41/T	41.7491	159/A	0.058158	2356
AT5G51770	Protein kinase superfamily protein	5_21031544	0.000664986	97	37.7024	41/T	41.7491	159/A	0.058158	Exon	✔
AT5G51780	basic helix-loop-helix (bHLH) DNA-binding superfamily protein	5_21031544	0.000664986	97	37.7024	41/T	41.7491	159/A	0.058158	-1279
AT5G51790	basic helix-loop-helix (bHLH) DNA-binding superfamily protein	5_21031544	0.000664986	97	37.7024	41/T	41.7491	159/A	0.058158	-6218
AT4G13400	2-oxoglutarate (2OG) and Fe(II)-dependent oxygenase superfamily protein	4_7801095	0.000676061	98	43.8318	44/C	39.9162	148/T	0.0595663	-7811
AT4G13410	ATCSLA15	4_7801095	0.000676061	98	43.8318	44/C	39.9162	148/T	0.0595663	-3271
AT4G13420	high affinity K+ transporter 5 (HAK5)	4_7801095	0.000676061	98	43.8318	44/C	39.9162	148/T	0.0595663	Intron	✔
AT4G13430	isopropyl malate isomerase large subunit 1 (IIL1)	4_7801095	0.000676061	98	43.8318	44/C	39.9162	148/T	0.0595663	2838
AT4G13440	Calcium-binding EF-hand family protein	4_7801095	0.000676061	98	43.8318	44/C	39.9162	148/T	0.0595663	-7120
AT3G29410	Terpenoid cyclases/Protein prenyltransferases superfamily protein	3_11313868	0.000676656	99	45.8762	21/T	40.2931	175/A	0.0585893	-6732
AT3G29420	pseudogene of geranylgeranyl pyrophosphate synthase 3	3_11313868	0.000676656	99	45.8762	21/T	40.2931	175/A	0.0585893	5790
AT3G29430	Terpenoid synthases superfamily protein	3_11313868	0.000676656	99	45.8762	21/T	40.2931	175/A	0.0585893	1076
AT3G29431	unknown protein	3_11313868	0.000676656	99	45.8762	21/T	40.2931	175/A	0.0585893	Prom	✔
AT3G29450	General transcription factor 2-related zinc finger protein	3_11313868	0.000676656	99	45.8762	21/T	40.2931	175/A	0.0585893	-6801	✔
AT4G17610	tRNA/rRNA methyltransferase (SpoU) family protein	4_9823745	0.000679282	100	39.2019	54/A	41.5548	146/G	0.0579534	-6835
AT4G17615	calcineurin B-like protein 1 (CBL1)	4_9823745	0.000679282	100	39.2019	54/A	41.5548	146/G	0.0579534	4433
AT4G17616	Pentatricopeptide repeat (PPR) superfamily protein	4_9823745	0.000679282	100	39.2019	54/A	41.5548	146/G	0.0579534	2061
AT4G17620	glycine-rich protein	4_9823745	0.000679282	100	39.2019	54/A	41.5548	146/G	0.0579534	Intron	✔
AT4G17640	casein kinase II beta chain 2 (CKB2)	4_9823745	0.000679282	100	39.2019	54/A	41.5548	146/G	0.0579534	Prom	✔
AT4G17650	Polyketide cyclase / dehydrase and lipid transport protein	4_9823745	0.000679282	100	39.2019	54/A	41.5548	146/G	0.0579534	-1770
AT4G17660	Protein kinase superfamily protein	4_9823745	0.000679282	100	39.2019	54/A	41.5548	146/G	0.0579534	-5614
AT4G17670	Protein of unknown function (DUF581)	4_9823745	0.000679282	100	39.2019	54/A	41.5548	146/G	0.0579534	9916
AT2G25520	Drug/metabolite transporter superfamily protein	2_10869468	0.000685161	101	38.8505	97/G	42.868	103/A	0.0578705	7111
AT2G25530	AFG1-like ATPase family protein	2_10869468	0.000685161	101	38.8505	97/G	42.868	103/A	0.0578705	2711
AT2G25540	cellulose synthase 10 (CESA10)	2_10869468	0.000685161	101	38.8505	97/G	42.868	103/A	0.0578705	Exon	✔
AT2G25560	DNAJ heat shock N-terminal domain-containing protein	2_10869468	0.000685161	101	38.8505	97/G	42.868	103/A	0.0578705	-9203
AT1G64180	intracellular protein transport protein USO1-related	1_23834091	0.000687698	102	38.532	50/T	41.615	147/C	0.0583189	9732
AT1G64185	Lactoylglutathione lyase / glyoxalase I family protein	1_23834091	0.000687698	102	38.532	50/T	41.615	147/C	0.0583189	8708
AT1G64190	6-phosphogluconate dehydrogenase family protein	1_23834091	0.000687698	102	38.532	50/T	41.615	147/C	0.0583189	-4955
AT1G64195	Defensin-like (DEFL) family protein	1_23834091	0.000687698	102	38.532	50/T	41.615	147/C	0.0583189	-4043
AT1G64200	vacuolar H+-ATPase subunit E isoform 3 (VHA-E3)	1_23834091	0.000687698	102	38.532	50/T	41.615	147/C	0.0583189	-2089
AT1G64210	Leucine-rich repeat protein kinase family protein	1_23834091	0.000687698	102	38.532	50/T	41.615	147/C	0.0583189	1228
AT1G64220	translocase of outer membrane 7 kDa subunit 2 (TOM7-2)	1_23834091	0.000687698	102	38.532	50/T	41.615	147/C	0.0583189	Prom	✔
AT1G64230	ubiquitin-conjugating enzyme 28 (UBC28)	1_23834091	0.000687698	102	38.532	50/T	41.615	147/C	0.0583189	Intron	✔
AT1G64235	Bifunctional inhibitor/lipid-transfer protein/seed storage 2S albumin superfamily protein	1_23834091	0.000687698	102	38.532	50/T	41.615	147/C	0.0583189	-158
AT1G64255	MuDR family transposase	1_23834091	0.000687698	102	38.532	50/T	41.615	147/C	0.0583189	-8863
AT1G54000	GDSL-like Lipase/Acylhydrolase superfamily protein	1_20168358	0.000702309	103	38.2049	82/C	42.7202	114/T	0.0578023	-9939
AT1G54010	GDSL-like Lipase/Acylhydrolase superfamily protein	1_20168358	0.000702309	103	38.2049	82/C	42.7202	114/T	0.0578023	-5543
AT1G54020	GDSL-like Lipase/Acylhydrolase superfamily protein	1_20168358	0.000702309	103	38.2049	82/C	42.7202	114/T	0.0578023	-2610
AT1G54030	MODIFIED VACUOLE PHENOTYPE 1 (MVP1)	1_20168358	0.000702309	103	38.2049	82/C	42.7202	114/T	0.0578023	Intron	✔
AT1G54040	epithiospecifier protein (ESP)	1_20168358	0.000702309	103	38.2049	82/C	42.7202	114/T	0.0578023	2357
AT3G13670	Protein kinase family protein	3_4482317	0.00070849	104	39.9967	92/A	41.6377	106/G	0.0576628	8770
AT3G13672	TRAF-like superfamily protein	3_4482317	0.00070849	104	39.9967	92/A	41.6377	106/G	0.0576628	-5939
AT3G13674	unknown protein	3_4482317	0.00070849	104	39.9967	92/A	41.6377	106/G	0.0576628	-4409
AT3G13677	unknown protein	3_4482317	0.00070849	104	39.9967	92/A	41.6377	106/G	0.0576628	5225
AT3G13680	F-box and associated interaction domains-containing protein	3_4482317	0.00070849	104	39.9967	92/A	41.6377	106/G	0.0576628	-1596
AT3G13682	LSD1-like2 (LDL2)	3_4482317	0.00070849	104	39.9967	92/A	41.6377	106/G	0.0576628	Prom	✔
AT3G13686	unknown protein	3_4482317	0.00070849	104	39.9967	92/A	41.6377	106/G	0.0576628	Prom	✔
AT3G13690	Protein kinase protein with adenine nucleotide alpha hydrolases-like domain	3_4482317	0.00070849	104	39.9967	92/A	41.6377	106/G	0.0576628	-1418
AT3G13700	RNA-binding (RRM/RBD/RNP motifs) family protein	3_4482317	0.00070849	104	39.9967	92/A	41.6377	106/G	0.0576628	8311
AT3G13710	prenylated RAB acceptor 1.F4 (PRA1.F4)	3_4482317	0.00070849	104	39.9967	92/A	41.6377	106/G	0.0576628	8311
AT2G21950	SKP1 interacting partner 6 (SKIP6)	2_9364426	0.000714405	105	35.9923	13/G	41.262	187/C	0.0574688	-7781
AT2G21960	unknown protein	2_9364426	0.000714405	105	35.9923	13/G	41.262	187/C	0.0574688	7335
AT2G21970	stress enhanced protein 2 (SEP2)	2_9364426	0.000714405	105	35.9923	13/G	41.262	187/C	0.0574688	-4510
AT2G21980	unknown protein	2_9364426	0.000714405	105	35.9923	13/G	41.262	187/C	0.0574688	-3365
AT2G21990	unknown function	2_9364426	0.000714405	105	35.9923	13/G	41.262	187/C	0.0574688	-1762
AT2G22000	elicitor peptide 6 precursor (PROPEP6)	2_9364426	0.000714405	105	35.9923	13/G	41.262	187/C	0.0574688	1223
AT2G22010	related to KPC1 (RKP)	2_9364426	0.000714405	105	35.9923	13/G	41.262	187/C	0.0574688	Exon	✔
AT2G22030	Galactose oxidase/kelch repeat superfamily protein	2_9364426	0.000714405	105	35.9923	13/G	41.262	187/C	0.0574688	-6104
AT4G08520	SNARE-like superfamily protein	4_5424962	0.000717029	106	44.6269	52/A	39.5187	144/C	0.0579624	4432
AT4G08530	Bifunctional inhibitor/lipid-transfer protein/seed storage 2S albumin superfamily protein	4_5424962	0.000717029	106	44.6269	52/A	39.5187	144/C	0.0579624	2606	✔
AT4G08540	DNA-directed RNA polymerase II protein	4_5424962	0.000717029	106	44.6269	52/A	39.5187	144/C	0.0579624	-6683
AT2G35730	Heavy metal transport/detoxification superfamily protein	2_15030653	0.000719925	107	43.44	35/C	40.3567	164/T	0.0574861	-7097
AT2G35733	unknown protein	2_15030653	0.000719925	107	43.44	35/C	40.3567	164/T	0.0574861	-5786
AT2G35736	unknown protein	2_15030653	0.000719925	107	43.44	35/C	40.3567	164/T	0.0574861	-5289
AT2G35740	nositol transporter 3 (INT3)	2_15030653	0.000719925	107	43.44	35/C	40.3567	164/T	0.0574861	-2239
AT2G35750	unknown protein	2_15030653	0.000719925	107	43.44	35/C	40.3567	164/T	0.0574861	Prom	✔
AT2G35760	Uncharacterised protein family (UPF0497)	2_15030653	0.000719925	107	43.44	35/C	40.3567	164/T	0.0574861	Prom	✔
AT2G35765	unknown protein	2_15030653	0.000719925	107	43.44	35/C	40.3567	164/T	0.0574861	-942
AT2G35770	serine carboxypeptidase-like 28 (scpl28)	2_15030653	0.000719925	107	43.44	35/C	40.3567	164/T	0.0574861	3384
AT2G35780	serine carboxypeptidase-like 26 (scpl26)	2_15030653	0.000719925	107	43.44	35/C	40.3567	164/T	0.0574861	7009
AT2G35790	unknown protein	2_15030653	0.000719925	107	43.44	35/C	40.3567	164/T	0.0574861	-8026
AT2G35795	Chaperone DnaJ-domain superfamily protein	2_15030653	0.000719925	107	43.44	35/C	40.3567	164/T	0.0574861	-9522
AT3G07790	DGCR14-related	3_2497708	0.000723959	108	45.2174	23/C	40.361	177/G	0.0573412	8488
AT3G07800	Thymidine kinase	3_2497708	0.000723959	108	45.2174	23/C	40.361	177/G	0.0573412	-4621
AT3G07810	RNA-binding (RRM/RBD/RNP motifs) family protein	3_2497708	0.000723959	108	45.2174	23/C	40.361	177/G	0.0573412	1958	✔
AT3G07820	Pectin lyase-like superfamily protein	3_2497708	0.000723959	108	45.2174	23/C	40.361	177/G	0.0573412	Exon	✔
AT3G07830	Pectin lyase-like superfamily protein	3_2497708	0.000723959	108	45.2174	23/C	40.361	177/G	0.0573412	1535
AT3G07840	Pectin lyase-like superfamily protein	3_2497708	0.000723959	108	45.2174	23/C	40.361	177/G	0.0573412	4185
AT3G07850	Pectin lyase-like superfamily protein	3_2497708	0.000723959	108	45.2174	23/C	40.361	177/G	0.0573412	7839
AT3G07860	Ubiquitin-like superfamily protein	3_2497708	0.000723959	108	45.2174	23/C	40.361	177/G	0.0573412	-8172
AT2G25520	Drug/metabolite transporter superfamily protein	2_10869952	0.000727746	109	35.9267	15/T	41.3243	185/C	0.0572911	7595
AT2G25530	AFG1-like ATPase family protein	2_10869952	0.000727746	109	35.9267	15/T	41.3243	185/C	0.0572911	3195
AT2G25540	cellulose synthase 10 (CESA10)	2_10869952	0.000727746	109	35.9267	15/T	41.3243	185/C	0.0572911	Exon	✔
AT2G25560	DNAJ heat shock N-terminal domain-containing protein	2_10869952	0.000727746	109	35.9267	15/T	41.3243	185/C	0.0572911	-8719
AT3G61620	RRP41	3_22813840	0.000737683	110	44.875	20/C	40.48	180/A	0.0571608	-7736
AT3G61630	cytokinin response factor 6 (CRF6)	3_22813840	0.000737683	110	44.875	20/C	40.48	180/A	0.0571608	7313
AT3G61640	arabinogalactan protein 20 (AGP20)	3_22813840	0.000737683	110	44.875	20/C	40.48	180/A	0.0571608	-1093
AT3G61650	gamma-tubulin (TUBG1)	3_22813840	0.000737683	110	44.875	20/C	40.48	180/A	0.0571608	Intron	✔
AT3G61660	unknown protein	3_22813840	0.000737683	110	44.875	20/C	40.48	180/A	0.0571608	-312
AT3G61670	Protein of unknown function (DUF3133)	3_22813840	0.000737683	110	44.875	20/C	40.48	180/A	0.0571608	-2749
AT3G61678	unknown protein	3_22813840	0.000737683	110	44.875	20/C	40.48	180/A	0.0571608	9403
AT3G61680	alpha/beta-Hydrolases superfamily protein	3_22813840	0.000737683	110	44.875	20/C	40.48	180/A	0.0571608	-7641
AT2G34660	multidrug resistance-associated protein 2 (MRP2)	2_14614515	0.000748571	111	43.3179	56/T	39.9868	144/G	0.0570202	1950	✔
AT2G34670	Protein of unknown function (DUF630 and DUF632)	2_14614515	0.000748571	111	43.3179	56/T	39.9868	144/G	0.0570202	Exon	✔
AT2G34680	AUXIN-INDUCED IN ROOT CULTURES 9 (AIR9)	2_14614515	0.000748571	111	43.3179	56/T	39.9868	144/G	0.0570202	2107
AT5G59580	UDP-glucosyl transferase 76E1 (UGT76E1)	5_24016719	0.000765448	112	39.4032	94/T	42.3257	105/C	0.0569907	-7030
AT5G59590	UDP-glucosyl transferase 76E2 (UGT76E2)	5_24016719	0.000765448	112	39.4032	94/T	42.3257	105/C	0.0569907	-4070
AT5G59600	Tetratricopeptide repeat (TPR)-like superfamily protein	5_24016719	0.000765448	112	39.4032	94/T	42.3257	105/C	0.0569907	-1694
AT5G59610	Chaperone DnaJ-domain superfamily protein	5_24016719	0.000765448	112	39.4032	94/T	42.3257	105/C	0.0569907	1648
AT5G59613	ATP synthase	5_24016719	0.000765448	112	39.4032	94/T	42.3257	105/C	0.0569907	Prom	✔
AT5G59616	Interleukin-1 receptor-associated kinase 4 protein	5_24016719	0.000765448	112	39.4032	94/T	42.3257	105/C	0.0569907	Prom	✔
AT5G40740	unknown protein	5_16317759	0.000768089	113	42.6853	95/G	39.2738	103/A	0.0570958	-9346
AT5G40750	FBD / Leucine Rich Repeat domains containing protein	5_16317759	0.000768089	113	42.6853	95/G	39.2738	103/A	0.0570958	7940
AT5G40760	glucose-6-phosphate dehydrogenase 6 (G6PD6)	5_16317759	0.000768089	113	42.6853	95/G	39.2738	103/A	0.0570958	2985
AT5G40770	prohibitin 3 (PHB3)	5_16317759	0.000768089	113	42.6853	95/G	39.2738	103/A	0.0570958	Prom	✔
AT5G40780	lysine histidine transporter 1 (LHT1)	5_16317759	0.000768089	113	42.6853	95/G	39.2738	103/A	0.0570958	-3892
AT1G27750	nucleic acid binding	1_9669731	0.000776364	114	42.9033	60/A	40.0693	140/T	0.0566704	7773
AT1G27752	Ubiquitin system component Cue protein	1_9669731	0.000776364	114	42.9033	60/A	40.0693	140/T	0.0566704	2192
AT1G27760	SALT-TOLERANCE 32 (SAT32)	1_9669731	0.000776364	114	42.9033	60/A	40.0693	140/T	0.0566704	Exon	✔
AT1G27770	autoinhibited Ca2+-ATPase 1 (ACA1)	1_9669731	0.000776364	114	42.9033	60/A	40.0693	140/T	0.0566704	1907	✔
AT3G11500	Small nuclear ribonucleoprotein family protein	3_3633887	0.000782934	115	43.6949	79/A	39.1074	121/T	0.0565896	-9281
AT3G11510	Ribosomal protein S11 family protein	3_3633887	0.000782934	115	43.6949	79/A	39.1074	121/T	0.0565896	-6947
AT3G11520	CYCLIN B1	3_3633887	0.000782934	115	43.6949	79/A	39.1074	121/T	0.0565896	-4614
AT3G11530	Vacuolar protein sorting 55 (VPS55) family protein	3_3633887	0.000782934	115	43.6949	79/A	39.1074	121/T	0.0565896	-1351	✔
AT3G11540	SPINDLY (SPY)	3_3633887	0.000782934	115	43.6949	79/A	39.1074	121/T	0.0565896	Intron	✔
AT3G11550	Uncharacterised protein family (UPF0497)	3_3633887	0.000782934	115	43.6949	79/A	39.1074	121/T	0.0565896	-2308
AT3G11560	LETM1-like protein	3_3633887	0.000782934	115	43.6949	79/A	39.1074	121/T	0.0565896	-3548
AT1G60700	SMAD/FHA domain-containing protein	1_22363675	0.000786606	116	39.0682	88/G	42.3741	112/A	0.0565447	-7203
AT1G60710	ATB2	1_22363675	0.000786606	116	39.0682	88/G	42.3741	112/A	0.0565447	-4914
AT1G60720	RNA-directed DNA polymerase (reverse transcriptase)-related family protein	1_22363675	0.000786606	116	39.0682	88/G	42.3741	112/A	0.0565447	5734
AT1G60730	NAD(P)-linked oxidoreductase superfamily protein	1_22363675	0.000786606	116	39.0682	88/G	42.3741	112/A	0.0565447	-1491
AT1G60740	Thioredoxin superfamily protein	1_22363675	0.000786606	116	39.0682	88/G	42.3741	112/A	0.0565447	1723
AT1G60750	NAD(P)-linked oxidoreductase superfamily protein	1_22363675	0.000786606	116	39.0682	88/G	42.3741	112/A	0.0565447	Exon	✔
AT1G60760	Plant invertase/pectin methylesterase inhibitor superfamily protein	1_22363675	0.000786606	116	39.0682	88/G	42.3741	112/A	0.0565447	-157
AT1G60770	Tetratricopeptide repeat (TPR)-like superfamily protein	1_22363675	0.000786606	116	39.0682	88/G	42.3741	112/A	0.0565447	3026
AT1G60780	HAPLESS 13 (HAP13)	1_22363675	0.000786606	116	39.0682	88/G	42.3741	112/A	0.0565447	5278
AT1G60783	unknown protein	1_22363675	0.000786606	116	39.0682	88/G	42.3741	112/A	0.0565447	-9234
AT5G03280	ETHYLENE INSENSITIVE 2 (EIN2)	5_802667	0.000799566	117	42.2908	65/T	40.2593	135/A	0.0563881	9311
AT5G03290	isocitrate dehydrogenase V (IDH-V)	5_802667	0.000799566	117	42.2908	65/T	40.2593	135/A	0.0563881	6485
AT5G03300	adenosine kinase 2 (ADK2)	5_802667	0.000799566	117	42.2908	65/T	40.2593	135/A	0.0563881	3491
AT5G03310	SAUR-like auxin-responsive protein family	5_802667	0.000799566	117	42.2908	65/T	40.2593	135/A	0.0563881	-961
AT5G03320	PATTERN-TRIGGERED IMMUNITY COMPROMISED RECEPTOR-LIKE CYTOPLASMIC KINASE 2 (PCRK2)	5_802667	0.000799566	117	42.2908	65/T	40.2593	135/A	0.0563881	Intron	✔
AT5G03330	Cysteine proteinases superfamily protein	5_802667	0.000799566	117	42.2908	65/T	40.2593	135/A	0.0563881	-2297
AT5G03340	CELL DIVISION CYCLE 48C (CDC48C)	5_802667	0.000799566	117	42.2908	65/T	40.2593	135/A	0.0563881	7281
AT5G03345	PSI-INTERACTING ROOT-CELL ENRICHED 2 (PRCE2)	5_802667	0.000799566	117	42.2908	65/T	40.2593	135/A	0.0563881	-9418
AT1G61230	Mannose-binding lectin superfamily protein	1_22589956	0.000801848	118	39.8736	87/G	41.6955	112/A	0.0564502	9175
AT1G61240	Protein of unknown function (DUF707)	1_22589956	0.000801848	118	39.8736	87/G	41.6955	112/A	0.0564502	4744
AT1G61250	secretory carrier 3 (SC3)	1_22589956	0.000801848	118	39.8736	87/G	41.6955	112/A	0.0564502	987
AT1G61255	BEST Arabidopsis thaliana protein match is: glycine-rich protein (TAIR:AT4G21620.2)	1_22589956	0.000801848	118	39.8736	87/G	41.6955	112/A	0.0564502	Prom	✔
AT1G61260	Protein of unknown function (DUF761)	1_22589956	0.000801848	118	39.8736	87/G	41.6955	112/A	0.0564502	3509
AT1G61270	Transmembrane amino acid transporter family protein	1_22589956	0.000801848	118	39.8736	87/G	41.6955	112/A	0.0564502	9709
AT4G07820	CAP (Cysteine-rich secretory proteins, Antigen 5, and Pathogenesis-related 1 protein)	4_4642158	0.000811162	119	38.3449	69/T	42.1835	127/C	0.0567897	-2708	✔
AT4G07825	unknown protein	4_4642158	0.000811162	119	38.3449	69/T	42.1835	127/C	0.0567897	Prom	✔
AT4G11860	unknown function	4_7148836	0.000822778	120	39.5831	89/C	41.991	111/T	0.0561138	-8333
AT4G11870	unknown protein	4_7148836	0.000822778	120	39.5831	89/C	41.991	111/T	0.0561138	-6117
AT4G11876	unknown protein	4_7148836	0.000822778	120	39.5831	89/C	41.991	111/T	0.0561138	6402
AT4G11880	AGAMOUS-like 14 (AGL14)	4_7148836	0.000822778	120	39.5831	89/C	41.991	111/T	0.0561138	1445
AT4G11890	Protein kinase superfamily protein	4_7148836	0.000822778	120	39.5831	89/C	41.991	111/T	0.0561138	Intron	✔
AT4G11900	S-locus lectin protein kinase family protein	4_7148836	0.000822778	120	39.5831	89/C	41.991	111/T	0.0561138	1405
AT4G11910	NONYELLOWING 2 (NYE2)	4_7148836	0.000822778	120	39.5831	89/C	41.991	111/T	0.0561138	-5416
AT4G11911	unknown protein	4_7148836	0.000822778	120	39.5831	89/C	41.991	111/T	0.0561138	-7314
AT3G46910	Cullin family protein	3_17284516	0.00082751	121	42.7443	70/T	39.8977	129/C	0.0561478	4864
AT3G46920	Protein kinase superfamily protein with octicosapeptide/Phox/Bem1p domain	3_17284516	0.00082751	121	42.7443	70/T	39.8977	129/C	0.0561478	Exon	✔
AT3G46930	Protein kinase superfamily protein	3_17284516	0.00082751	121	42.7443	70/T	39.8977	129/C	0.0561478	Prom	✔
AT3G46940	DUTP-PYROPHOSPHATASE-LIKE 1 (DUT1)	3_17284516	0.00082751	121	42.7443	70/T	39.8977	129/C	0.0561478	3678
AT3G46950	Mitochondrial transcription termination factor family protein	3_17284516	0.00082751	121	42.7443	70/T	39.8977	129/C	0.0561478	-2853
AT3G46960	RNA helicase	3_17284516	0.00082751	121	42.7443	70/T	39.8977	129/C	0.0561478	6357
AT3G29570	unknown protein	3_11372333	0.000829057	122	44.9903	31/T	40.1283	166/C	0.0563244	-5544	✔
AT3G29575	ABI five binding protein 3 (AFP3)	3_11372333	0.000829057	122	44.9903	31/T	40.1283	166/C	0.0563244	9881
AT4G10700	BEST Arabidopsis thaliana protein match is: CDC68-related (TAIR:AT4G10660.1)	4_6608854	0.000837015	123	39.3333	45/C	41.38	155/G	0.0559495	-8196
AT4G10710	global transcription factor C (SPT16)	4_6608854	0.000837015	123	39.3333	45/C	41.38	155/G	0.0559495	-500	✔
AT4G10720	Ankyrin repeat family protein	4_6608854	0.000837015	123	39.3333	45/C	41.38	155/G	0.0559495	Exon	✔
AT4G10730	Protein kinase superfamily protein	4_6608854	0.000837015	123	39.3333	45/C	41.38	155/G	0.0559495	564	✔
AT4G10740	F-box and associated interaction domains-containing protein	4_6608854	0.000837015	123	39.3333	45/C	41.38	155/G	0.0559495	8289
AT4G10750	Phosphoenolpyruvate carboxylase family protein	4_6608854	0.000837015	123	39.3333	45/C	41.38	155/G	0.0559495	-7822
AT3G60420	Phosphoglycerate mutase family protein	3_22345467	0.000842436	124	43.1463	54/A	40.0959	146/C	0.0558877	7850
AT3G60440	Phosphoglycerate mutase family protein	3_22345467	0.000842436	124	43.1463	54/A	40.0959	146/C	0.0558877	6021
AT3G60450	Phosphoglycerate mutase family protein	3_22345467	0.000842436	124	43.1463	54/A	40.0959	146/C	0.0558877	3152
AT3G60460	DUO POLLEN 1 (DUO1)	3_22345467	0.000842436	124	43.1463	54/A	40.0959	146/C	0.0558877	Prom	✔
AT3G60470	Plant protein of unknown function (DUF247)	3_22345467	0.000842436	124	43.1463	54/A	40.0959	146/C	0.0558877	Exon	✔
AT3G60480	unknown protein	3_22345467	0.000842436	124	43.1463	54/A	40.0959	146/C	0.0558877	1984
AT3G60490	Integrase-type DNA-binding superfamily protein	3_22345467	0.000842436	124	43.1463	54/A	40.0959	146/C	0.0558877	-2060
AT3G60500	ECERIFERUM 7 (CER7)	3_22345467	0.000842436	124	43.1463	54/A	40.0959	146/C	0.0558877	-6416
AT4G13400	2-oxoglutarate (2OG) and Fe(II)-dependent oxygenase superfamily protein	4_7801250	0.000848209	125	43.922	41/G	40.1453	159/A	0.0558223	-7966
AT4G13410	ATCSLA15	4_7801250	0.000848209	125	43.922	41/G	40.1453	159/A	0.0558223	-3426
AT4G13420	high affinity K+ transporter 5 (HAK5)	4_7801250	0.000848209	125	43.922	41/G	40.1453	159/A	0.0558223	Exon	✔
AT4G13430	isopropyl malate isomerase large subunit 1 (IIL1)	4_7801250	0.000848209	125	43.922	41/G	40.1453	159/A	0.0558223	2683
AT4G13440	Calcium-binding EF-hand family protein	4_7801250	0.000848209	125	43.922	41/G	40.1453	159/A	0.0558223	-6965
AT2G01680	Ankyrin repeat family protein	2_311554	0.000848968	126	42.2919	62/T	40.3029	138/G	0.0558138	2895
AT2G01690	ARM repeat superfamily protein	2_311554	0.000848968	126	42.2919	62/T	40.3029	138/G	0.0558138	Exon	✔
AT2G01710	Chaperone DnaJ-domain superfamily protein	2_311554	0.000848968	126	42.2919	62/T	40.3029	138/G	0.0558138	-2172	✔
AT2G01720	Ribophorin I	2_311554	0.000848968	126	42.2919	62/T	40.3029	138/G	0.0558138	5476
AT2G01730	cleavage and polyadenylation specificity factor 73 kDa subunit-II (CPSF73-II)	2_311554	0.000848968	126	42.2919	62/T	40.3029	138/G	0.0558138	-6924
AT5G24310	ABL interactor-like protein 3 (ABIL3)	5_8284711	0.000849224	127	40.9571	14/A	40.9167	186/G	0.0558109	8185
AT5G24313	unknown protein	5_8284711	0.000849224	127	40.9571	14/A	40.9167	186/G	0.0558109	-5309
AT5G24314	plastid transcriptionally active7 (PTAC7)	5_8284711	0.000849224	127	40.9571	14/A	40.9167	186/G	0.0558109	5471
AT5G24316	proline-rich family protein	5_8284711	0.000849224	127	40.9571	14/A	40.9167	186/G	0.0558109	-2747
AT5G24318	O-Glycosyl hydrolases family 17 protein	5_8284711	0.000849224	127	40.9571	14/A	40.9167	186/G	0.0558109	Prom	✔
AT5G24320	Transducin/WD40 repeat-like superfamily protein	5_8284711	0.000849224	127	40.9571	14/A	40.9167	186/G	0.0558109	Prom	✔
AT3G46450	SEC14 cytosolic factor family protein / phosphoglyceride transfer family protein	3_17106024	0.000852966	128	43.0433	30/G	40.5171	164/A	0.0583665	-8385
AT3G46460	ubiquitin-conjugating enzyme 13 (UBC13)	3_17106024	0.000852966	128	43.0433	30/G	40.5171	164/A	0.0583665	-6572
AT3G46470	RNA-binding (RRM/RBD/RNP motifs) family protein	3_17106024	0.000852966	128	43.0433	30/G	40.5171	164/A	0.0583665	-3051
AT3G46480	2-oxoglutarate (2OG) and Fe(II)-dependent oxygenase superfamily protein	3_17106024	0.000852966	128	43.0433	30/G	40.5171	164/A	0.0583665	430	✔
AT3G46490	2-oxoglutarate (2OG) and Fe(II)-dependent oxygenase superfamily protein	3_17106024	0.000852966	128	43.0433	30/G	40.5171	164/A	0.0583665	-7605	✔
AT3G49990	unknown protein	3_18543518	0.000855781	129	43.3217	46/A	40.2131	153/G	0.0557873	-7244
AT3G50000	CASEIN KINASE II, ALPHA CHAIN 2	3_18543518	0.000855781	129	43.3217	46/A	40.2131	153/G	0.0557873	6548
AT3G50010	Cysteine/Histidine-rich C1 domain family protein	3_18543518	0.000855781	129	43.3217	46/A	40.2131	153/G	0.0557873	-1917
AT3G50020	potato inhibitor I-type family protein	3_18543518	0.000855781	129	43.3217	46/A	40.2131	153/G	0.0557873	Prom	✔
AT3G50022	unknown protein	3_18543518	0.000855781	129	43.3217	46/A	40.2131	153/G	0.0557873	42	✔
AT3G50030	ARM-repeat/Tetratricopeptide repeat (TPR)-like protein	3_18543518	0.000855781	129	43.3217	46/A	40.2131	153/G	0.0557873	2972
AT3G50040	unknown protein	3_18543518	0.000855781	129	43.3217	46/A	40.2131	153/G	0.0557873	5750
AT3G46910	Cullin family protein	3_17284719	0.000864415	130	42.7345	55/G	40.231	145/T	0.0556412	5067
AT3G46920	Protein kinase superfamily protein with octicosapeptide/Phox/Bem1p domain	3_17284719	0.000864415	130	42.7345	55/G	40.231	145/T	0.0556412	Exon	✔
AT3G46930	Protein kinase superfamily protein	3_17284719	0.000864415	130	42.7345	55/G	40.231	145/T	0.0556412	Prom	✔
AT3G46940	DUTP-PYROPHOSPHATASE-LIKE 1 (DUT1)	3_17284719	0.000864415	130	42.7345	55/G	40.231	145/T	0.0556412	3475
AT3G46950	Mitochondrial transcription termination factor family protein	3_17284719	0.000864415	130	42.7345	55/G	40.231	145/T	0.0556412	-2650
AT3G46960	RNA helicase	3_17284719	0.000864415	130	42.7345	55/G	40.231	145/T	0.0556412	6154
AT1G54210	AUTOPHAGY 12 A (ATG12A)	1_20251460	0.000871026	131	47.0462	13/C	40.4936	187/T	0.0555683	8845
AT1G54215	proline-rich family protein	1_20251460	0.000871026	131	47.0462	13/C	40.4936	187/T	0.0555683	7833
AT1G54217	Ribosomal protein L18ae family	1_20251460	0.000871026	131	47.0462	13/C	40.4936	187/T	0.0555683	-3933
AT1G54220	long form protein	1_20251460	0.000871026	131	47.0462	13/C	40.4936	187/T	0.0555683	Prom	✔
AT1G54230	Winged helix-turn-helix transcription repressor DNA-binding	1_20251460	0.000871026	131	47.0462	13/C	40.4936	187/T	0.0555683	Intron	✔
AT1G54240	winged-helix DNA-binding transcription factor family protein	1_20251460	0.000871026	131	47.0462	13/C	40.4936	187/T	0.0555683	Prom	✔
AT1G54250	NRPB8A	1_20251460	0.000871026	131	47.0462	13/C	40.4936	187/T	0.0555683	-1478
AT1G54260	winged-helix DNA-binding transcription factor family protein	1_20251460	0.000871026	131	47.0462	13/C	40.4936	187/T	0.0555683	-3476
AT1G54270	eif4a-2 (EIF4A-2)	1_20251460	0.000871026	131	47.0462	13/C	40.4936	187/T	0.0555683	-6232
AT2G40490	HEME2	2_16924912	0.000885219	132	43.5551	49/G	40.0642	151/T	0.0554136	9735
AT2G40500	Protein kinase superfamily protein	2_16924912	0.000885219	132	43.5551	49/G	40.0642	151/T	0.0554136	7695
AT2G40510	Ribosomal protein S26e family protein	2_16924912	0.000885219	132	43.5551	49/G	40.0642	151/T	0.0554136	5024
AT2G40520	Nucleotidyltransferase family protein	2_16924912	0.000885219	132	43.5551	49/G	40.0642	151/T	0.0554136	Exon	✔
AT2G40530	unknown protein	2_16924912	0.000885219	132	43.5551	49/G	40.0642	151/T	0.0554136	-590	✔
AT2G40540	potassium transporter 2 (KT2)	2_16924912	0.000885219	132	43.5551	49/G	40.0642	151/T	0.0554136	-3952
AT2G40550	E2F target gene 1 (ETG1)	2_16924912	0.000885219	132	43.5551	49/G	40.0642	151/T	0.0554136	-7922
AT1G30280	Chaperone DnaJ-domain superfamily protein	1_10673375	0.000886196	133	37.6607	28/C	41.4257	171/G	0.0554241	-6707
AT1G30290	Tetratricopeptide repeat (TPR)-like superfamily protein	1_10673375	0.000886196	133	37.6607	28/C	41.4257	171/G	0.0554241	Prom	✔
AT1G30300	Metallo-hydrolase/oxidoreductase superfamily protein	1_10673375	0.000886196	133	37.6607	28/C	41.4257	171/G	0.0554241	Intron	✔
AT1G30320	Remorin family protein	1_10673375	0.000886196	133	37.6607	28/C	41.4257	171/G	0.0554241	-4871
AT2G25560	DNAJ heat shock N-terminal domain-containing protein	2_10884178	0.000886919	134	37.7205	44/T	41.8218	156/C	0.0553953	310	✔
AT2G25565	Zinc finger	2_10884178	0.000886919	134	37.7205	44/T	41.8218	156/C	0.0553953	Exon	✔
AT2G25570	binding	2_10884178	0.000886919	134	37.7205	44/T	41.8218	156/C	0.0553953	788	✔
AT2G25580	Tetratricopeptide repeat (TPR)-like superfamily protein	2_10884178	0.000886919	134	37.7205	44/T	41.8218	156/C	0.0553953	-1836
AT2G25590	Plant Tudor-like protein	2_10884178	0.000886919	134	37.7205	44/T	41.8218	156/C	0.0553953	-4725
AT2G25600	Shaker pollen inward K+ channel (SPIK)	2_10884178	0.000886919	134	37.7205	44/T	41.8218	156/C	0.0553953	-8308
AT5G26820	iron-regulated protein 3 (IREG3)	5_9445925	0.000893824	135	38.9534	73/G	42.0992	126/A	0.0555005	8820
AT5G26830	Threonyl-tRNA synthetase	5_9445925	0.000893824	135	38.9534	73/G	42.0992	126/A	0.0555005	4146
AT5G26840	unknown protein	5_9445925	0.000893824	135	38.9534	73/G	42.0992	126/A	0.0555005	-1320
AT5G26848	unknown protein	5_9445925	0.000893824	135	38.9534	73/G	42.0992	126/A	0.0555005	Prom	✔
AT5G26850	Uncharacterized protein	5_9445925	0.000893824	135	38.9534	73/G	42.0992	126/A	0.0555005	Intron	✔
AT5G26860	lon protease 1 (LON1)	5_9445925	0.000893824	135	38.9534	73/G	42.0992	126/A	0.0555005	-3123	✔
AT1G34630	BEST Arabidopsis thaliana protein match is: Mitochondrial import inner membrane translocase subunit Tim17/Tim22/Tim23 family protein (TAIR:AT5G51150.1)	1_12685001	0.000925579	136	43.2432	74/C	39.4556	124/T	0.0551151	Prom	✔
AT1G34640	peptidases	1_12685001	0.000925579	136	43.2432	74/C	39.4556	124/T	0.0551151	2551
AT1G34650	homeodomain GLABROUS 10 (HDG10)	1_12685001	0.000925579	136	43.2432	74/C	39.4556	124/T	0.0551151	-5994
AT2G39470	PsbP-like protein 2 (PPL2)	2_16487513	0.00092724	137	38.5692	13/T	41.0829	187/C	0.0549702	9670
AT2G39480	P-glycoprotein 6 (PGP6)	2_16487513	0.00092724	137	38.5692	13/T	41.0829	187/C	0.0549702	-474	✔
AT2G39490	F-box family protein	2_16487513	0.00092724	137	38.5692	13/T	41.0829	187/C	0.0549702	Exon	✔
AT2G39500	unknown protein	2_16487513	0.00092724	137	38.5692	13/T	41.0829	187/C	0.0549702	Prom	✔
AT2G39510	nodulin MtN21 /EamA-like transporter family protein	2_16487513	0.00092724	137	38.5692	13/T	41.0829	187/C	0.0549702	3630
AT2G39518	Uncharacterised protein family (UPF0497)	2_16487513	0.00092724	137	38.5692	13/T	41.0829	187/C	0.0549702	8362
AT2G39520	unknown protein	2_16487513	0.00092724	137	38.5692	13/T	41.0829	187/C	0.0549702	-7300
AT2G32540	cellulose synthase-like B4 (CSLB04)	2_13824725	0.000943571	138	45.0395	38/C	39.9531	162/T	0.0548034	6436
AT2G32550	Rcd1-like protein	2_13824725	0.000943571	138	45.0395	38/C	39.9531	162/T	0.0548034	1886
AT2G32560	F-box family protein	2_13824725	0.000943571	138	45.0395	38/C	39.9531	162/T	0.0548034	Prom	✔
AT2G32580	unknown function	2_13824725	0.000943571	138	45.0395	38/C	39.9531	162/T	0.0548034	-711	✔
AT2G32590	EMBRYO DEFECTIVE 2795 (EMB2795)	2_13824725	0.000943571	138	45.0395	38/C	39.9531	162/T	0.0548034	4695
AT2G32600	hydroxyproline-rich glycoprotein family protein	2_13824725	0.000943571	138	45.0395	38/C	39.9531	162/T	0.0548034	8820
AT2G32610	cellulose synthase-like B1 (CSLB01)	2_13824725	0.000943571	138	45.0395	38/C	39.9531	162/T	0.0548034	-9509
AT5G37474	Putative membrane lipoprotein	5_14887006	0.000955294	139	38.7	43/A	41.3953	149/G	0.0571193	-9479
AT5G37478	TPX2 (targeting protein for Xklp2) protein family	5_14887006	0.000955294	139	38.7	43/A	41.3953	149/G	0.0571193	3017
AT5G37480	unknown protein	5_14887006	0.000955294	139	38.7	43/A	41.3953	149/G	0.0571193	Prom	✔
AT5G37490	ARM repeat superfamily protein	5_14887006	0.000955294	139	38.7	43/A	41.3953	149/G	0.0571193	Prom	✔
AT5G37500	gated outwardly-rectifying K+ channel (GORK)	5_14887006	0.000955294	139	38.7	43/A	41.3953	149/G	0.0571193	2686
AT5G37510	mitochondrial	5_14887006	0.000955294	139	38.7	43/A	41.3953	149/G	0.0571193	-8404
AT1G43780	serine carboxypeptidase-like 44 (scpl44)	1_16565175	0.000956041	140	41.7105	86/T	40.2814	113/C	0.0547645	Exon	✔
AT1G43790	tracheary element differentiation-related 6 (TED6)	1_16565175	0.000956041	140	41.7105	86/T	40.2814	113/C	0.0547645	-8720
AT2G25540	cellulose synthase 10 (CESA10)	2_10883217	0.000961836	141	35.365	20/A	41.5367	180/G	0.0546203	-9140	✔
AT2G25560	DNAJ heat shock N-terminal domain-containing protein	2_10883217	0.000961836	141	35.365	20/A	41.5367	180/G	0.0546203	Exon	✔
AT2G25565	Zinc finger	2_10883217	0.000961836	141	35.365	20/A	41.5367	180/G	0.0546203	845
AT2G25570	binding	2_10883217	0.000961836	141	35.365	20/A	41.5367	180/G	0.0546203	1749
AT2G25580	Tetratricopeptide repeat (TPR)-like superfamily protein	2_10883217	0.000961836	141	35.365	20/A	41.5367	180/G	0.0546203	-2797
AT2G25590	Plant Tudor-like protein	2_10883217	0.000961836	141	35.365	20/A	41.5367	180/G	0.0546203	-5686
AT2G25600	Shaker pollen inward K+ channel (SPIK)	2_10883217	0.000961836	141	35.365	20/A	41.5367	180/G	0.0546203	-9269
AT1G60710	ATB2	1_22367408	0.000973757	143	37.6854	41/G	41.7535	159/C	0.0545027	-8647
AT1G60720	RNA-directed DNA polymerase (reverse transcriptase)-related family protein	1_22367408	0.000973757	143	37.6854	41/G	41.7535	159/C	0.0545027	9467
AT1G60730	NAD(P)-linked oxidoreductase superfamily protein	1_22367408	0.000973757	143	37.6854	41/G	41.7535	159/C	0.0545027	-5224
AT1G60740	Thioredoxin superfamily protein	1_22367408	0.000973757	143	37.6854	41/G	41.7535	159/C	0.0545027	5456
AT1G60750	NAD(P)-linked oxidoreductase superfamily protein	1_22367408	0.000973757	143	37.6854	41/G	41.7535	159/C	0.0545027	-1554
AT1G60760	Plant invertase/pectin methylesterase inhibitor superfamily protein	1_22367408	0.000973757	143	37.6854	41/G	41.7535	159/C	0.0545027	1085
AT1G60770	Tetratricopeptide repeat (TPR)-like superfamily protein	1_22367408	0.000973757	143	37.6854	41/G	41.7535	159/C	0.0545027	Exon	✔
AT1G60780	HAPLESS 13 (HAP13)	1_22367408	0.000973757	143	37.6854	41/G	41.7535	159/C	0.0545027	1545
AT1G60783	unknown protein	1_22367408	0.000973757	143	37.6854	41/G	41.7535	159/C	0.0545027	-5501
AT5G20290	Ribosomal protein S8e family protein	5_6864236	0.000977675	144	42.9175	57/C	40.1231	143/A	0.0544644	-9170
AT5G20300	Avirulence induced gene (AIG1) family protein	5_6864236	0.000977675	144	42.9175	57/C	40.1231	143/A	0.0544644	-5259
AT5G20310	Adenine nucleotide alpha hydrolases-like superfamily protein	5_6864236	0.000977675	144	42.9175	57/C	40.1231	143/A	0.0544644	5091
AT5G20320	dicer-like 4 (DCL4)	5_6864236	0.000977675	144	42.9175	57/C	40.1231	143/A	0.0544644	Intron	✔
AT5G20330	BETA-1,3-GLUCANASE 4	5_6864236	0.000977675	144	42.9175	57/C	40.1231	143/A	0.0544644	-5325
AT5G20340	BETA-1,3-GLUCANASE 5	5_6864236	0.000977675	144	42.9175	57/C	40.1231	143/A	0.0544644	-8551
AT5G38800	basic leucine-zipper 43 (bZIP43)	5_15547680	0.000998792	145	36.9717	46/G	42.0987	154/A	0.0542604	-6878
AT5G38810	F-box and associated interaction domains-containing protein	5_15547680	0.000998792	145	36.9717	46/G	42.0987	154/A	0.0542604	-4140
AT5G38820	Transmembrane amino acid transporter family protein	5_15547680	0.000998792	145	36.9717	46/G	42.0987	154/A	0.0542604	2498
AT5G38830	Cysteinyl-tRNA synthetase	5_15547680	0.000998792	145	36.9717	46/G	42.0987	154/A	0.0542604	Intron	✔
AT5G38840	SMAD/FHA domain-containing protein	5_15547680	0.000998792	145	36.9717	46/G	42.0987	154/A	0.0542604	-1616	✔
AT5G38850	Disease resistance protein (TIR-NBS-LRR class)	5_15547680	0.000998792	145	36.9717	46/G	42.0987	154/A	0.0542604	-5476	✔
AT5G38860	BES1-interacting Myc-like protein 3 (BIM3)	5_15547680	0.000998792	145	36.9717	46/G	42.0987	154/A	0.0542604	-9276
AT5G60660	plasma membrane intrinsic protein 2	5_24388081	0.00100514	146	43.524	75/A	39.3113	124/G	0.0542856	-9092
AT5G60670	Ribosomal protein L11 family protein	5_24388081	0.00100514	146	43.524	75/A	39.3113	124/G	0.0542856	-4488
AT5G60680	unknown function	5_24388081	0.00100514	146	43.524	75/A	39.3113	124/G	0.0542856	1105	✔
AT5G60690	REVOLUTA (REV)	5_24388081	0.00100514	146	43.524	75/A	39.3113	124/G	0.0542856	-6942
AT3G25440	RNA-binding CRS1 / YhbY (CRM) domain protein	3_9235700	0.00100588	147	43.4886	35/T	40.3745	165/A	0.054193	9990
AT3G25460	F-box and associated interaction domains-containing protein	3_9235700	0.00100588	147	43.4886	35/T	40.3745	165/A	0.054193	-1034
AT3G25470	bacterial hemolysin-related	3_9235700	0.00100588	147	43.4886	35/T	40.3745	165/A	0.054193	487
AT3G25480	Rhodanese/Cell cycle control phosphatase superfamily protein	3_9235700	0.00100588	147	43.4886	35/T	40.3745	165/A	0.054193	Intron	✔
AT3G25490	Protein kinase family protein	3_9235700	0.00100588	147	43.4886	35/T	40.3745	165/A	0.054193	-4025
AT5G41840	F-box/RNI-like superfamily protein	5_16758860	0.00101634	148	39.6761	92/C	41.9787	108/G	0.0540942	-597
AT5G41850	alpha/beta-Hydrolases superfamily protein	5_16758860	0.00101634	148	39.6761	92/C	41.9787	108/G	0.0540942	Prom	✔
AT5G41860	unknown protein	5_16758860	0.00101634	148	39.6761	92/C	41.9787	108/G	0.0540942	142	✔
AT5G41870	Pectin lyase-like superfamily protein	5_16758860	0.00101634	148	39.6761	92/C	41.9787	108/G	0.0540942	Exon	✔
AT5G41880	POLA3	5_16758860	0.00101634	148	39.6761	92/C	41.9787	108/G	0.0540942	-48	✔
AT5G41890	GDSL-like Lipase/Acylhydrolase superfamily protein	5_16758860	0.00101634	148	39.6761	92/C	41.9787	108/G	0.0540942	5351
AT5G41900	alpha/beta-Hydrolases superfamily protein	5_16758860	0.00101634	148	39.6761	92/C	41.9787	108/G	0.0540942	-8093
AT3G30720	QUA-QUINE STARCH (QQS)	3_12337404	0.00101992	149	39.4714	84/A	41.9184	114/G	0.0541462	-9643	✔
AT3G11510	Ribosomal protein S11 family protein	3_3635997	0.00102279	150	44.3328	64/G	39.3132	136/A	0.0540339	-9057
AT3G11520	CYCLIN B1	3_3635997	0.00102279	150	44.3328	64/G	39.3132	136/A	0.0540339	-6724
AT3G11530	Vacuolar protein sorting 55 (VPS55) family protein	3_3635997	0.00102279	150	44.3328	64/G	39.3132	136/A	0.0540339	-3461
AT3G11540	SPINDLY (SPY)	3_3635997	0.00102279	150	44.3328	64/G	39.3132	136/A	0.0540339	Exon	✔
AT3G11550	Uncharacterised protein family (UPF0497)	3_3635997	0.00102279	150	44.3328	64/G	39.3132	136/A	0.0540339	-198	✔
AT3G11560	LETM1-like protein	3_3635997	0.00102279	150	44.3328	64/G	39.3132	136/A	0.0540339	-1438	✔
AT3G11570	TRICHOME BIREFRINGENCE-LIKE 8 (TBL8)	3_3635997	0.00102279	150	44.3328	64/G	39.3132	136/A	0.0540339	9025
AT1G47395	unknown protein	1_17391206	0.00102403	151	42.327	74/G	39.6883	120/C	0.0554392	7798
AT1G47400	unknown protein	1_17391206	0.00102403	151	42.327	74/G	39.6883	120/C	0.0554392	5020
AT1G47410	unknown protein	1_17391206	0.00102403	151	42.327	74/G	39.6883	120/C	0.0554392	-876	✔
AT1G47420	succinate dehydrogenase 5 (SDH5)	1_17391206	0.00102403	151	42.327	74/G	39.6883	120/C	0.0554392	4312
AT1G67640	Transmembrane amino acid transporter family protein	1_25363220	0.00103804	152	36.0063	16/C	41.3268	183/T	0.053978	-7312
AT1G67650	SRP72 RNA-binding domain	1_25363220	0.00103804	152	36.0063	16/C	41.3268	183/T	0.053978	Prom	✔
AT1G67660	Restriction endonuclease_type II-like superfamily protein	1_25363220	0.00103804	152	36.0063	16/C	41.3268	183/T	0.053978	Prom	✔
AT1G67670	unknown protein	1_25363220	0.00103804	152	36.0063	16/C	41.3268	183/T	0.053978	-253	✔
AT1G67680	SRP72 RNA-binding domain	1_25363220	0.00103804	152	36.0063	16/C	41.3268	183/T	0.053978	2536
AT1G67690	Zincin-like metalloproteases family protein	1_25363220	0.00103804	152	36.0063	16/C	41.3268	183/T	0.053978	-3866
AT1G67700	unknown protein	1_25363220	0.00103804	152	36.0063	16/C	41.3268	183/T	0.053978	-9002
AT1G48110	evolutionarily conserved C-terminal region 7 (ECT7)	1_17781134	0.00104128	153	40.3515	33/C	41.0317	167/T	0.0538631	-5641
AT1G48120	hydrolases	1_17781134	0.00104128	153	40.3515	33/C	41.0317	167/T	0.0538631	Prom	✔
AT1G48130	1-cysteine peroxiredoxin 1 (PER1)	1_17781134	0.00104128	153	40.3515	33/C	41.0317	167/T	0.0538631	Exon	✔
AT1G48140	dolichol-phosphate mannosyltransferase-related	1_17781134	0.00104128	153	40.3515	33/C	41.0317	167/T	0.0538631	Prom	✔
AT1G48145	BEST Arabidopsis thaliana protein match is: Plant mobile domain protein family (TAIR:AT1G50790.1)	1_17781134	0.00104128	153	40.3515	33/C	41.0317	167/T	0.0538631	3373
AT1G48150	MADS-box transcription factor family protein	1_17781134	0.00104128	153	40.3515	33/C	41.0317	167/T	0.0538631	-2263
AT1G48160	SRP19	1_17781134	0.00104128	153	40.3515	33/C	41.0317	167/T	0.0538631	5411
AT1G48170	unknown protein	1_17781134	0.00104128	153	40.3515	33/C	41.0317	167/T	0.0538631	-5652
AT1G48175	embryo defective 2191 (emb2191)	1_17781134	0.00104128	153	40.3515	33/C	41.0317	167/T	0.0538631	-7373
AT2G23300	Leucine-rich repeat protein kinase family protein	2_9924726	0.00104166	154	36.5786	14/T	41.2259	185/A	0.0539447	7596
AT2G23310	ATRER1C1	2_9924726	0.00104166	154	36.5786	14/T	41.2259	185/A	0.0539447	5468
AT2G23320	WRKY DNA-binding protein 15 (WRKY15)	2_9924726	0.00104166	154	36.5786	14/T	41.2259	185/A	0.0539447	Prom	✔
AT2G23321	unknown protein	2_9924726	0.00104166	154	36.5786	14/T	41.2259	185/A	0.0539447	Prom	✔
AT3G17668	ENHANCER OF ATNSI ACTIVITY (ENA)	3_6049897	0.00104377	155	38.01	50/T	41.8893	150/G	0.0538403	9408
AT3G17670	tetratricopeptide repeat (TPR)-containing protein	3_6049897	0.00104377	155	38.01	50/T	41.8893	150/G	0.0538403	7309
AT3G17675	Cupredoxin superfamily protein	3_6049897	0.00104377	155	38.01	50/T	41.8893	150/G	0.0538403	-5047
AT3G17680	Kinase interacting (KIP1-like) family protein	3_6049897	0.00104377	155	38.01	50/T	41.8893	150/G	0.0538403	-3393
AT3G17690	cyclic nucleotide gated channel 19 (CNGC19)	3_6049897	0.00104377	155	38.01	50/T	41.8893	150/G	0.0538403	1409
AT3G17700	cyclic nucleotide-binding transporter 1 (CNBT1)	3_6049897	0.00104377	155	38.01	50/T	41.8893	150/G	0.0538403	Intron	✔
AT3G17710	F-box and associated interaction domains-containing protein	3_6049897	0.00104377	155	38.01	50/T	41.8893	150/G	0.0538403	-3651
AT3G17712	unknown protein	3_6049897	0.00104377	155	38.01	50/T	41.8893	150/G	0.0538403	-4973
AT2G29050	RHOMBOID-like 1 (RBL1)	2_12489922	0.0010466	157	44.0746	71/T	39.1375	128/C	0.0538995	9550
AT2G29060	GRAS family transcription factor	2_12489922	0.0010466	157	44.0746	71/T	39.1375	128/C	0.0538995	5835
AT2G29070	Ubiquitin fusion degradation UFD1 family protein	2_12489922	0.0010466	157	44.0746	71/T	39.1375	128/C	0.0538995	404	✔
AT2G29080	FTSH protease 3 (ftsh3)	2_12489922	0.0010466	157	44.0746	71/T	39.1375	128/C	0.0538995	Exon	✔
AT2G29090	cytochrome P450_family 707	2_12489922	0.0010466	157	44.0746	71/T	39.1375	128/C	0.0538995	4929
AT3G42473	low-molecular-weight cysteine-rich 47 (LCR47)	3_14599396	0.00105648	159	35.5333	15/G	41.2569	181/T	0.0546343	-5722	✔
AT1G23200	Plant invertase/pectin methylesterase inhibitor superfamily	1_8235322	0.00106018	160	37.4262	42/G	41.8321	156/A	0.0538521	5740
AT1G23201	FUNCTIONS IN: molecular	1_8235322	0.00106018	160	37.4262	42/G	41.8321	156/A	0.0538521	4547
AT1G23205	Plant invertase/pectin methylesterase inhibitor superfamily protein	1_8235322	0.00106018	160	37.4262	42/G	41.8321	156/A	0.0538521	Prom	✔
AT1G23210	glycosyl hydrolase 9B6 (GH9B6)	1_8235322	0.00106018	160	37.4262	42/G	41.8321	156/A	0.0538521	-2852
AT1G23220	Dynein light chain type 1 family protein	1_8235322	0.00106018	160	37.4262	42/G	41.8321	156/A	0.0538521	-5101
AT1G23230	CONTAINS InterPro DOMAIN/s: Mediator complex subunit Med23 (InterPro:IPR021629)	1_8235322	0.00106018	160	37.4262	42/G	41.8321	156/A	0.0538521	-7118
"candidate gene" in the last colum indicates that the gene was located in LD of the GWAS detected SNP.

## Sheet: Supplementary Table S7
Supplementary Table S7 Correlation between amino acid substitution of AtALMT1 and AtTRX1 and GWAS detected SNPs on the loci
		ID	6909	CS76392	CS76397	CS76399	CS76412	CS76404	CS76373	CS76423	CS76367	CS76363	CS76384	CS76383	CS76426	CS76379	CS76380	CS76381	CS76353	CS76370	CS76419	CS76372	CS76347	CS76377	CS76378	CS76420	CS76371	CS76421	CS76375	CS76374	CS76376	CS76422	CS76352	CS76362	CS76368	CS76359	CS76360	CS76389	CS76395	CS76396	CS76390	CS76388	CS76398	CS76416	CS76417	CS76406	CS76400	CS76403	CS76401
		Name	Col-0	Bak-2	Del-10	Ey15-2	Fei-0	HKT2.4	Bolin-1	Galdo-1	Lago-1	Moran-1	Kly4	Koz2	Leb-3	Sij1	Sij2	Sij4	Altenb-2	Petro-1	Slavi-1	Jablo-1	Aitba-2	Stepn-2	Stepn-1	Copac-1	Lecho-1	Borsk-2	Shigu-1	Shigu-2	Kidr-1	Krazo-2	Voeran-1	Angel-1	Apost-1	Ciste-1	Ciste-2	Istisu-1	Kastel-1	Koch-1	Lag2.2	Lerik1-3	Nemrut-1	Pra-6	Qui-0	Rue3-1-31	Star-8	TueSB30-3	Tuescha9
AtALMT1	Amino acid polymorphim	8	V	V	V	M	V	V	V	V	V	V	V	V	V	V	V	V	V	V	V	V	V	V	V	V	V	V	V	V	V	V	V	V	V	V	V	V	V	V	V	V	V	V	V	V	V	V	V
		16	N	N	K	N	N	N	N	N	N	N	N	N	N	K	K	N	N	N	N	N	N	N	N	N	N	N	K	K	N	N	N	N	N	N	N	N	N	N	N	N	N	N	N	N	N	N	N
		36	S	S	S	S	S	S	S	S	S	S	S	S	S	S	S	S	S	S	S	S	S	S	S	S	S	S	S	S	S	S	S	S	S	S	S	S	S	S	S	S	S	S	S	S	S	S	S
		78	L	L	L	L	L	L	L	L	L	L	L	L	L	L	L	L	L	L	L	L	L	L	L	L	L	L	L	L	L	L	X	L	L	L	L	L	L	L	L	L	L	L	L	L	L	L	L
		112	M	M	M	M	M	M	M	M	M	M	M	M	M	M	M	M	M	M	M	M	M	M	M	M	M	M	M	M	M	M	M	M	M	M	M	M	I	M	M	M	M	M	M	M	M	M	M
		121	S	S	S	S	S	S	S	S	L	L	S	S	S	S	S	S	S	S	S	S	S	S	S	S	S	S	S	S	S	S	S	L	L	S	S	S	S	S	S	S	S	S	S	S	S	S	S
		202	T	T	T	T	T	T	T	T	T	T	I	I	I	T	T	T	T	T	I	T	T	T	T	T	I	T	T	T	T	T	T	T	T	T	T	T	T	T	T	T	T	T	T	T	T	T	T
		375	V	V	V	V	V	V	V	V	V	V	V	V	V	V	V	V	V	V	V	V	I	V	V	V	V	V	V	V	V	V	V	V	V	V	V	V	V	V	V	V	V	V	V	V	V	V	V
		383	N	N	N	N	N	N	N	N	N	N	N	N	N	N	N	K	N	N	N	N	N	N	N	N	N	N	N	N	N	N	N	N	N	N	N	N	N	N	N	N	N	N	N	N	N	N	N
		404	K	K	K	K	K	K	K	K	K	K	K	K	K	K	K	K	K	K	K	K	K	K	K	K	K	K	K	K	K	K	K	K	K	K	K	K	K	K	K	K	K	K	K	K	K	K	K
	GWAS detected SNP	Chr.1_2657131	T	C	C	C	C	C	C	C	C	C	C	C	C	C	C	C	C	C	C	C	C	C	C	C	C	C	C	C	C	C	C	C	C	C	C	C	C	C	C	C	C	C	C	C	T	C	C
		Chr.1_2658099	C	T	T	T	T	T	T	T	T	T	T	T	T	T	T	T	T	T	T	T	T	T	T	T	T	T	T	T	T	T	T	T	T	T	T	T	T	T	T	T	T	T	T	T	C	T	T
		ID	6909	CS76392	CS76397	CS76399	CS76412	CS76404	CS76373	CS76423	CS76367	CS76363	CS76384	CS76383	CS76426	CS76379	CS76380	CS76381	CS76353	CS76370	CS76419	CS76372	CS76347	CS76377	CS76378	CS76420	CS76371	CS76421	CS76375	CS76374	CS76376	CS76422	CS76352	CS76362	CS76368	CS76359	CS76360	CS76389	CS76395	CS76396	CS76390	CS76388	CS76398	CS76416	CS76417	CS76406	CS76400	CS76403	CS76401
		Name	Col-0	Bak-2	Del-10	Ey15-2	Fei-0	HKT2.4	Bolin-1	Galdo-1	Lago-1	Moran-1	Kly4	Koz2	Leb-3	Sij1	Sij2	Sij4	Altenb-2	Petro-1	Slavi-1	Jablo-1	Aitba-2	Stepn-2	Stepn-1	Copac-1	Lecho-1	Borsk-2	Shigu-1	Shigu-2	Kidr-1	Krazo-2	Voeran-1	Angel-1	Apost-1	Ciste-1	Ciste-2	Istisu-1	Kastel-1	Koch-1	Lag2.2	Lerik1-3	Nemrut-1	Pra-6	Qui-0	Rue3-1-31	Star-8	TueSB30-3	Tuescha9
AtTRX1	Amino acid polymorphim	12	H	H	H	H	H	H	H	H	H	H	H	H	H	H	H	H	H	H	H	H	H	H	H	H	H	H	H	H	H	H	H	H	H	H	H	H	H	H	H	H	H	H	H	H	H	H	H
		27	S	S	S	S	S	S	S	S	S	S	S	S	S	S	S	S	S	S	S	S	S	S	S	S	S	S	S	S	S	S	S	S	S	S	S	S	S	S	S	S	S	S	S	S	S	S	S
		34	D	D	D	D	D	D	D	D	D	D	D	D	D	D	D	D	D	D	D	D	D	D	D	D	D	D	D	D	D	D	D	D	D	D	D	D	D	D	D	D	D	D	D	D	D	D	D
		81	A	A	A	A	A	A	A	A	V	A	A	A	A	A	A	A	V	A	A	A	A	A	A	A	A	A	A	A	A	A	A	A	A	A	A	A	A	A	A	A	A	A	A	A	A	A	A
		100	A	A	A	A	A	A	A	A	A	A	A	A	A	A	A	A	A	A	A	A	G	A	A	A	A	A	A	A	A	A	A	A	A	A	A	A	A	A	A	A	A	A	A	A	A	A	A
	GWAS detected SNP	Chr.3_18951741	A	C	C	C	C	C	A	C	A	C	A	C	C	C	C	C	A	A	C	C	C	C	A	C	A	C	A	A	C	C	C	A	A	C	A	C	A	A	A	C	A	C	C	C	A	C	C
[truncated: 59 more columns]

## Sheet: Supplementary Table S8
Supplementary Table S8 DDBJ accession numbers for AtALMT1 promoter sequence of accessions.
EcoID	Name	Accession number
6901	Bil-7	LC528883
6904	Br-0	LC528884
8270	Bs-1	LC528885
8271	Bu-0	LC528886
7094	Da-0	LC528887
7100	Db-0	LC528888
7176	Is-1	LC528889
7206	Kro-0	LC528890
6939	Mt-0	LC528891
6940	Mz-0	LC528892
CS76374	Shigu-2	LC528893
7378	Uk-1	LC528894
7033	Buckhorn_Pass	LC528895
6906	C24	LC528896
7104	Dra-1	LC528897
7105	Dra-2	LC528898
6009	Eden-1	LC528899
6916	Est-1	LC528900
7135	Fr-4	LC528901
8300	Gr-1	LC528902
6922	Gu-0	LC528903
7150	Gu-1	LC528904
8314	Ka-0	LC528905
7199	Kl-5	LC528906
CS76384	Kly4	LC528907
CS76383	Koz2	LC528908
CS76426	Leb-3	LC528909
CS76371	Lecho-1	LC528910
6932	Ler-1	LC528911
8329	Lm-2	LC528912
7520	Lp2-2	LC528913
8366	Rd-0	LC528914
CS76419	Slavi-1	LC528915
CS76400	Star-8	LC528916
6979	Wei-0	LC528917
6984	Zdr-1	LC528918
6910	Ct-1	LC528919
6980	Ws-0	LC528920
8274	Can-0	LC528921
7029	Bch-3	LC528922
8395	Tu-0	LC528923
8374	Rsch-4	LC528924
7373	Tsu-0	LC528925
7030	Bch-4	LC528926
7078	Co-2	LC528927
7004	Bs-2	LC528928
